# Supplementary material
Source: PubMed Central journal article supplement (PMC2040024)
Supplement: NIHMS29626-supplement-02.pdf [file NIHMS29626-supplement-02.pdf]

| probe.set     | Gene Title                                                                                    | Gene Symbol    | DD rank | LD rank | Phase (CT) | Biological Process I          | Biological Process II            |
|---------------|-----------------------------------------------------------------------------------------------|----------------|---------|---------|------------|-------------------------------|----------------------------------|
| 1415779_s_at  | actin, gamma, cytoplasmic 1                                                                   | Actg1          | 1       | 3       | 4.5        | development                   | cell organization and biogenesis |
| 1415984_at    | acyl-Coenzyme A dehydrogenase, medium chain                                                   | Acadm#         | 2       | 6       | 4.5        | metabolism                    |                                  |
| 1416178_a_at  | pleckstrin homology domain containing, family B (evectins) member 1                           | Plekhp1#       | 3       | 9       | 16.5       |                               |                                  |
| 1416203_at    | aquaporin 1                                                                                   | Aqp1#          | 4       | 10      | 16.5       | transport                     |                                  |
| 1416953_at    | connective tissue growth factor                                                               | Ctgf#          | 5       | 16      | 12.5       | cell adhesion                 | DNA metabolism                   |
| 1417602_at    | period homolog 2 (Drosophila)                                                                 | Per2#          | 6       | 23      | 12.5       | RNA metabolism-transcription  | signal transduction              |
| 1418174_at    | D site albumin promoter binding protein                                                       | Dbp            | 7       | 26      | 8.5        | RNA metabolism-transcription  | metabolism                       |
| 1418829_a_at  | enolase 2, gamma neuronal                                                                     | Eno2           | 8       | 31      | 16.5       | metabolism                    |                                  |
| 1418839_at    | glomulin, FKBP associated protein                                                             | Glim#          | 9       | 32      | 8.5        | cell proliferation-cell cycle | development                      |
| 1419025_at    | retinal S-antigen                                                                             | Saq#           | 10      | 33      | 8.5        | signal transduction           |                                  |
| 1419740_at    | phosphodiesterase 6B, cGMP, rod receptor, beta polypeptide                                    | Pde6b          | 11      | 37      | 4.5        | signal transduction           |                                  |
| 1420147_at    | expressed sequence AA407331                                                                   | AA407331       | 12      | 38      | 4.5        |                               |                                  |
| 1420505_a_at  | syntaxin binding protein 1                                                                    | Stxbp1#        | 13      | 39      | 8.5        | transport                     | development                      |
| 1420772_a_at  | TSC22 domain family 3                                                                         | Tsc22d3#       | 14      | 41      | 12.5       | death                         | RNA metabolism-transcription     |
| 1421061_at    | guanylate cyclase activator 1a (retina)                                                       | Guca1a         | 15      | 43      | 8.5        |                               |                                  |
| 1421096_at    | transient receptor potential cation channel, subfamily C, member 1                            | Trpc1          | 16      | 45      | 8.5        | transport                     |                                  |
| 1424175_at    | thyrotroph embryonic factor                                                                   | Tef            | 17      | 58      | 8.5        | RNA metabolism-transcription  | metabolism                       |
| 1425281_a_at  | TSC22 domain family 3                                                                         | Tsc22d3        | 18      | 63      | 12.5       | death                         | RNA metabolism-transcription     |
| 1425557_x_at  | TSC22 domain family 3                                                                         | Tsc22d3        | 19      | 67      | 12.5       | death                         | RNA metabolism-transcription     |
| 1427075_s_at  | protein-L-isopartate (D-aspartate) O-methyltransferase domain containing 2                    | Pomt2          | 20      | 76      | 8.5        | protein metabolism            | metabolism                       |
| 1438009_at    | similar to histone 2a                                                                         | MGCT3635       | 21      | 91      | 20.5       | DNA metabolism                | cell organization and biogenesis |
| 1438211_s_at  | D site albumin promoter binding protein                                                       | Dbp#           | 22      | 92      | 8.5        | RNA metabolism-transcription  | metabolism                       |
| 1450215_at    | recoverin                                                                                     | Rcvn           | 23      | 111     | 16.5       | transport                     | signal transduction              |
| 1434603_at    | thyroid hormone receptor associated protein 2                                                 | Thrap2#        | 24      | 137     | 4.5        | RNA metabolism-transcription  | metabolism                       |
| 1444472_at    | SNF1-like kinase 2                                                                            | Snf1lk2#       | 25      | 154     | 12.5       | signal transduction           | protein metabolism               |
| 1456487_at    | adenylate cyclase 1                                                                           | Adcy1#         | 26      | 162     | 8.5        | signal transduction           | metabolism                       |
| 1455140_at    | PITPNM family member 3                                                                        | Pitpnm3        | 27      | 170     | 20.5       | transport                     | metabolism                       |
| 1439862_at    | Visual cortex cDNA, RIKEN full-length enriched library, clone:K530032J01 product:unclassified | ---            | 28      | 175     | 16.5       |                               |                                  |
| 1448383_at    | matrix metalloproteinase 14 (membrane-inserted)                                               | Mmp14#         | 29      | 194     | 0.5        | protein metabolism            | metabolism                       |
| 1427074_at    | protein-L-isopartate (D-aspartate) O-methyltransferase domain containing 2                    | Pomt2          | 30      | 201     | 8.5        | protein metabolism            | metabolism                       |
| 1425138_at    | guanylate cyclase activator 1B                                                                | Guca1b         | 31      | 206     | 4.5        | cell-cell signaling           | signal transduction              |
| AFFX-b-ActinM | actin, beta, cytoplasmic                                                                      | Actb           | 32      | 224     | 4.5        |                               |                                  |
| 1435453_at    | RIKEN cDNA A930011O12 gene                                                                    | A930011O12Rik  | 33      | 263     | 16.5       |                               |                                  |
| 1422660_at    | similar to Putative RNA-binding protein 3 (RNA-binding motif protein 3)                       | LOC671237      | 34      | 281     | 8.5        | RNA metabolism-transcription  | stress response                  |
| 1434150_a_at  | methyltransferase like 7A                                                                     | Mettl7a#       | 35      | 308     | 12.5       |                               |                                  |
| 1426310_at    | zinc finger, DHHC domain containing 5                                                         | Zdhhc5#        | 36      | 488     | 16.5       |                               |                                  |
| 1454714_x_at  | 3-phosphoglycerate dehydrogenase                                                              | Phgdh          | 37      | 2125    | 4.5        | metabolism                    |                                  |
| 1438954_x_at  | ---                                                                                           | ---            | 38      | 4950    | 12.5       |                               |                                  |
| 1444347_at    | mannoside acetylglucosaminyltransferase 4, isoenzyme A                                        | Mgat4a         | 39      | 5362    | 20.5       | metabolism                    |                                  |
| 1444317_at    | protocadherin 15                                                                              | Pcdh15#        | 40      | 153     | 12.5       | cell adhesion                 | development                      |
| 1450706_a_at  | ADP-ribosylation factor-like 3                                                                | Ari3           | 41      | 187     | 8.5        | signal transduction           |                                  |
| 1438040_a_at  | heat shock protein 90kDa beta (Grp94), member 1                                               | Hsp90b1        | 42      | 2014    | 16.5       | DNA metabolism                | stress response                  |
| 1426645_at    | heat shock protein 90kDa alpha (cytosolic), class A member 1                                  | Hsp90aa1       | 43      | 74      | 16.5       | stress response               | development                      |
| 1425306_at    | cDNA sequence BC027072                                                                        | BC027072       | 44      | 64      | 8.5        |                               |                                  |
| 1423126_at    | ATPase, Na+/K+ transporting, beta 3 polypeptide                                               | Atp1b3         | 45      | 2365    | 0.5        | transport                     |                                  |
| 1421007_at    | procollagen, type IV, alpha 6                                                                 | Col4a6         | 46      | 17528   | 8.5        | transport                     |                                  |
| 1420817_at    | 3-monooxygenase/tryptophan 5-monooxygenase activation protein, gamma polypeptide              | Ywhag          | 47      | 29176   | 12.5       | cell-cell signaling           | transport                        |
| 1420623_x_at  | heat shock protein 8                                                                          | Hspa8          | 48      | 40      | 16.5       | cell proliferation-cell cycle | stress response                  |
| 1416958_at    | nuclear receptor subfamily 1, group D, member 2                                               | Nr1d2#         | 49      | 18      | 8.5        | RNA metabolism-transcription  | metabolism                       |
| 1453509_at    | Ly6/Plaur domain containing 2                                                                 | Lypd2          | 50      | 1831    | 8.5        |                               |                                  |
| 1444172_at    | Transcribed locus                                                                             | ---            | 51      | 152     | 20.5       |                               |                                  |
| 1443952_at    | thyroid hormone receptor alpha                                                                | Thra           | 52      | 8554    | 4.5        | RNA metabolism-transcription  | development                      |
| 1434572_at    | histone deacetylase 9                                                                         | Hdac9          | 53      | 136     | 4.5        | cell proliferation-cell cycle | DNA metabolism                   |
| 1452499_a_at  | kinesin family member 2A                                                                      | Kif2a          | 54      | 123     | 20.5       | transport                     | cell organization and biogenesis |
| 1450953_at    | cytosolic iron-sulfur protein assembly 1 homolog (S. cerevisiae)                              | Ciao1          | 55      | 10989   | 16.5       | cell proliferation-cell cycle | RNA metabolism-transcription     |
| 1450391_a_at  | monoglyceride lipase                                                                          | Mgll           | 56      | 360     | 20.5       | stress response               | protein metabolism               |
| 1450377_at    | similar to thrombospondin 1                                                                   | LOC640441      | 57      | 407     | 20.5       | cell adhesion                 | stress response                  |
| 1438902_a_at  | heat shock protein 90kDa alpha (cytosolic), class A member 1                                  | Hsp90aa1       | 58      | 563     | 16.5       | stress response               | development                      |
| 1437711_x_at  | ornithine decarboxylase, structural 1                                                         | Odc1           | 59      | 90      | 8.5        | cell proliferation-cell cycle | development                      |
| 1423933_a_at  | RIKEN cDNA 1600029D21 gene                                                                    | 1600029D21Rik  | 60      | 277     | 20.5       |                               |                                  |
| 1423862_at    | pleckstrin homology domain containing, family F (with FYVE domain) member 2                   | Plekfh2        | 61      | 1460    | 0.5        |                               |                                  |
| 1422230_s_at  | cytochrome P450, family 2, subfamily a, polypeptide 4                                         | Cyp2a4         | 62      | 446     | 8.5        | metabolism                    |                                  |
| 1420376_a_at  | H3 histone, family 3B                                                                         | H3f3b          | 63      | 215     | 8.5        | DNA metabolism                | cell organization and biogenesis |
| 1418022_at    | NMDA receptor-regulated gene 1                                                                | Narg1          | 64      | 22686   | 8.5        | RNA metabolism-transcription  | development                      |
| 1415993_at    | squalene epoxidase                                                                            | Sqle           | 65      | 7       | 4.5        | metabolism                    |                                  |
| 1434867_at    | solute carrier family 4, sodium bicarbonate transporter-like, member 11                       | Slc4a11        | 66      | 876     | 6.5        | transport                     |                                  |
| 1434800_at    | synaptic vesicle glycoprotein 2 b                                                             | Sv2b           | 67      | 788     | 4.5        | cell-cell signaling           | transport                        |
| 1451285_at    | fusion, derived from t(12;16) malignant liposarcoma (human)                                   | Fus            | 68      | 301     | 4.5        | RNA metabolism-transcription  | metabolism                       |
| 1438761_a_at  | ornithine decarboxylase, structural 1                                                         | Odc1           | 69      | 241     | 4.5        | cell proliferation-cell cycle | development                      |
| 1433444_at    | 3-hydroxy-3-methylglutaryl-Coenzyme A synthase 1                                              | Hmgcs1         | 70      | 274     | 4.5        | metabolism                    |                                  |
| 1419070_at    | cystin 1                                                                                      | Cys1           | 71      | 219     | 12.5       |                               |                                  |
| 1417457_at    | CDC28 protein kinase regulatory subunit 2                                                     | Cks2           | 72      | 286     | 0.5        | cell proliferation-cell cycle | signal transduction              |
| 1417429_at    | flavin containing monooxygenase 1                                                             | Fmo1           | 73      | 22      | 12.5       | transport                     | metabolism                       |
| 1416332_at    | cold inducible RNA binding protein                                                            | Cirbp          | 74      | 12      | 8.5        | stress response               |                                  |
| 1454991_at    | solute carrier family 7 (cationic amino acid transporter, y+ system), member 1                | Slc7a1         | 75      | 1405    | 8.5        | transport                     | metabolism                       |
| 1436470_at    | regulating synaptic membrane exocytosis 2                                                     | Rims2          | 76      | 146     | 12.5       | cell-cell signaling           | transport                        |
| 1455725_a_at  | H3 histone, family 3B                                                                         | H3f3b          | 77      | 183     | 8.5        | DNA metabolism                | cell organization and biogenesis |
| 1449434_at    | carbonic anhydrase 3                                                                          | Car3           | 78      | 107     | 8.5        | metabolism                    |                                  |
| 1428082_at    | acyl-CoA synthetase long-chain family member 5                                                | Acs15          | 79      | 7259    | 4.5        | metabolism                    |                                  |
| 1426517_at    | guanine nucleotide binding protein, alpha z subunit                                           | Gnaz           | 80      | 71      | 16.5       | signal transduction           |                                  |
| 1426268_at    | RIKEN cDNA C130090K23 gene                                                                    | C130090K23Rik  | 81      | 14527   | 4.5        |                               |                                  |
| 1425441_at    | ---                                                                                           | ---            | 82      | 204     | 0.5        |                               |                                  |
| 1425408_a_at  | RIKEN cDNA 2610034M16 gene                                                                    | 2610034M16Rik# | 83      | 66      | 4.5        | transport                     | cell organization and biogenesis |
| 1425100_a_at  | phosphodiesterase 6C, cGMP-specific, rod, gamma                                               | Pde6g          | 84      | 276     | 16.5       | signal transduction           |                                  |
| 1423861_at    | pleckstrin homology domain containing, family F (with FYVE domain) member 2                   | Plekfh2        | 85      | 458     | 0.5        |                               |                                  |
| 1420622_a_at  | heat shock protein 8                                                                          | Hspa8          | 86      | 728     | 16.5       | cell proliferation-cell cycle | stress response                  |
| 1418705_at    | cone-rod homeobox containing gene                                                             | Crx            | 87      | 29      | 20.5       | RNA metabolism-transcription  | development                      |
| 1443694_at    | Regulator of G-protein signaling 20                                                           | Rgs20#         | 88      | 151     | 8.5        | signal transduction           |                                  |
| 1418649_at    | EGL nine homolog 3 (C. elegans)                                                               | Egln3          | 89      | 675     | 0.5        | death                         | protein metabolism               |
| 1437989_at    | phosphodiesterase 8B                                                                          | Pde8b          | 90      | 292     | 20.5       | RNA metabolism-transcription  | signal transduction              |
| 1416256_a_at  | tubulin, beta 5                                                                               | Tubb5          | 91      | 11      | 16.5       | cell proliferation-cell cycle | death                            |
| 1435440_at    | PDZ domain containing 8                                                                       | Pdzd8          | 92      | 178     | 0.5        | signal transduction           |                                  |
| 1456471_x_at  | 3-phosphoglycerate dehydrogenase                                                              | Phgdh          | 93      | 1697    | 4.5        | metabolism                    |                                  |
| 1449821_a_at  | RIKEN cDNA 0610016J10 gene                                                                    | 0610016J10Rik  | 94      | 562     | 4.5        |                               |                                  |
| 1437277_x_at  | transglutaminase 2, C polypeptide                                                             | Tgm2           | 95      | 936     | 0.5        | cell adhesion                 | signal transduction              |
| 1434799_x_at  | aldolase 1, A isoform                                                                         | Aldoa          | 96      | 84      | 20.5       | metabolism                    |                                  |
| 1422082_a_at  | nuclear transcription factor-Y alpha                                                          | Nfy            | 97      | 20722   | 8.5        | RNA metabolism-transcription  | metabolism                       |
| 1448657_a_at  | DnaJ (Hsp40) homolog, subfamily B, member 10                                                  | Dnajb10        | 98      | 475     | 20.5       | protein metabolism            | metabolism                       |
| 1419638_at    | ephrin B2                                                                                     | Efnb2          | 99      | 23236   | 4.5        | development                   |                                  |
| 1417663_a_at  | N-myc downstream regulated gene 3                                                             | Ndrg3          | 100     | 1477    | 16.5       | development                   | cell organization and biogenesis |
| 1416572_at    | matrix metalloproteinase 14 (membrane-inserted)                                               | Mmp14          | 101     | 3839    | 0.5        | protein metabolism            | metabolism                       |
| 1435741_at    | phosphodiesterase 8B                                                                          | Pde8b          | 102     | 418     | 20.5       | RNA metabolism-transcription  | signal transduction              |
| 1435319_at    | inositol hexaphosphate kinase 2                                                               | Ihpk2          | 103     | 264     | 8.5        | death                         | development                      |
| 1434769_at    | BTB (POZ) domain containing 9                                                                 | Btd9           | 104     | 10063   | 20.5       | cell adhesion                 |                                  |
| 1456510_x_at  | UbiE protein                                                                                  | Ubie           | 105     | 2896    | 12.5       |                               |                                  |

|              |                                                                                  |               |     |       |      |                                  |                                  |
|--------------|----------------------------------------------------------------------------------|---------------|-----|-------|------|----------------------------------|----------------------------------|
| 1452927_x_at | triosephosphate isomerase 1                                                      | Tpi1          | 106 | 125   | 16.5 | metabolism                       |                                  |
| 1426311_s_at | zinc finger, DHHC domain containing 5                                            | Zdhhc5        | 107 | 202   | 16.5 |                                  |                                  |
| 1423784_at   | glycyl-tRNA synthetase                                                           | Gars          | 108 | 672   | 8.5  | RNA metabolism-transcription     | transport                        |
| 1420093_s_at | heterogeneous nuclear ribonucleoprotein D-like                                   | Hnrpdl        | 109 | 336   | 8.5  | RNA metabolism-transcription     | metabolism                       |
| 1417664_a_at | N-myc downstream regulated gene 3                                                | Ndrp3         | 110 | 721   | 20.5 | development                      | cell organization and biogenesis |
| 1453782_at   | RIKEN cDNA 3021401C12 gene                                                       | 3021401C12Rik | 111 | 157   | 8.5  |                                  |                                  |
| 1435189_at   | FERM and PDZ domain containing 1                                                 | Frmppd1       | 112 | 139   | 16.5 | signal transduction              |                                  |
| 1455464_x_at | ---                                                                              | ---           | 113 | 1130  | 4.5  |                                  |                                  |
| 1436338_at   | ---                                                                              | ---           | 114 | 145   | 16.5 |                                  |                                  |
| 1433728_at   | cDNA sequence BC038479                                                           | BC038479      | 115 | 510   | 0.5  | metabolism                       |                                  |
| 1451895_a_at | 24-dehydrocholesterol reductase                                                  | Dhcr24        | 116 | 405   | 4.5  | cell proliferation-cell cycle    | death                            |
| 1450329_a_at | arrestin 3, retinal                                                              | Arr3#         | 117 | 112   | 12.5 | transport                        | signal transduction              |
| 1449039_a_at | heterogeneous nuclear ribonucleoprotein D-like                                   | Hnrpdl        | 118 | 1363  | 8.5  | RNA metabolism-transcription     | metabolism                       |
| 1448797_at   | ELK3, member of ETS oncogene family                                              | Elk3          | 119 | 5944  | 0.5  | cell proliferation-cell cycle    | RNA metabolism-transcription     |
| 1426464_at   | nuclear receptor subfamily 1, group D, member 1                                  | Nr1d1#        | 120 | 250   | 4.5  | RNA metabolism-transcription     | metabolism                       |
| 1424251_a_at | heterogeneous nuclear ribonucleoprotein D-like                                   | Hnrpdl        | 121 | 1577  | 8.5  | RNA metabolism-transcription     | metabolism                       |
| 1423631_at   | nuclear receptor subfamily 2, group E, member 3                                  | Nr2e3         | 122 | 55    | 0.5  | cell proliferation-cell cycle    | RNA metabolism-transcription     |
| 1420846_at   | mitochondrial ribosomal protein S2                                               | Mrps2         | 123 | 1893  | 8.5  | protein metabolism               | metabolism                       |
| 1418892_at   | ras homolog gene family, member J                                                | Rhoj          | 124 | 568   | 0.5  | development                      | signal transduction              |
| 1433742_at   | ankyrin repeat domain 15                                                         | Ankrd15       | 125 | 3392  | 20.5 | RNA metabolism-transcription     | metabolism                       |
| 1452534_a_at | high mobility group box 2                                                        | Hmgb2         | 126 | 298   | 4.5  | DNA metabolism                   | RNA metabolism-transcription     |
| 1450193_at   | hyperpolarization-activated, cyclic nucleotide-gated K+ 1                        | Hcn1          | 127 | 189   | 8.5  | transport                        |                                  |
| 1427743_at   | Gene model 672, (NCBI)                                                           | Gm672         | 128 | 19355 | 20.5 |                                  |                                  |
| 1455537_at   | RIKEN cDNA 6430547I21 gene                                                       | 6430547I21Rik | 129 | 227   | 20.5 |                                  |                                  |
| 1422842_at   | 5'-3' exoribonuclease 2                                                          | Xrn2          | 130 | 2669  | 12.5 | DNA metabolism                   | RNA metabolism-transcription     |
| 1455033_at   | RIKEN cDNA B430201A12 gene                                                       | B430201A12Rik | 131 | 159   | 8.5  |                                  |                                  |
| 1442180_at   | deleted in lymphocytic leukemia, 7                                               | Dleu7         | 132 | 1749  | 4.5  |                                  |                                  |
| 1429791_at   | RIKEN cDNA A930004D18 gene                                                       | A930004D18Rik | 133 | 453   | 0.5  |                                  |                                  |
| 1451478_at   | angiopoietin-like 7                                                              | Angptl7       | 134 | 184   | 12.5 | stress response                  | signal transduction              |
| 1426785_s_at | monoglyceride lipase                                                             | Mql#          | 135 | 249   | 0.5  | stress response                  | protein metabolism               |
| 1422830_s_at | dopamine receptor 4                                                              | Drd4#         | 136 | 50    | 20.5 | signal transduction              |                                  |
| 1417458_s_at | CDC28 protein kinase regulatory subunit 2                                        | Cks2          | 137 | 448   | 0.5  | cell proliferation-cell cycle    | signal transduction              |
| 1440683_at   | RIKEN cDNA A930004D18 gene                                                       | A930004D18Rik | 138 | 607   | 4.5  |                                  |                                  |
| 1435436_at   | endothelial PAS domain protein 1                                                 | Epas1         | 139 | 1694  | 12.5 | RNA metabolism-transcription     | stress response                  |
| 1450892_a_at | ubiquitin specific peptidase 4 (proto-oncogene)                                  | Usp4          | 140 | 9817  | 0.5  | protein metabolism               | metabolism                       |
| 1425974_a_at | tripartite motif protein 25                                                      | Trim25        | 141 | 682   | 20.5 |                                  |                                  |
| 1449364_at   | aurora kinase C                                                                  | Aurkc         | 142 | 24072 | 16.5 | cell proliferation-cell cycle    | protein metabolism               |
| 1421095_a_at | transient receptor potential cation channel, subfamily C, member 1               | Trpc1         | 143 | 213   | 4.5  | transport                        |                                  |
| 1433819_s_at | 1-acylglycerol-3-phosphate O-acyltransferase 3                                   | Agpat3        | 144 | 133   | 20.5 | metabolism                       |                                  |
| 1450725_s_at | carbonic anhydrase 14                                                            | Car14         | 145 | 7955  | 12.5 | metabolism                       |                                  |
| 1448276_at   | tetraspanin 4                                                                    | Tspan4        | 146 | 325   | 8.5  | protein metabolism               | metabolism                       |
| 1426621_a_at | protein phosphatase 2 (formerly 2A), regulatory subunit B (PR 52), beta isoform  | Ppp2r2b       | 147 | 73    | 4.5  | signal transduction              |                                  |
| 1424638_at   | cyclin-dependent kinase inhibitor 1A (P21)                                       | Cdkn1a        | 148 | 1675  | 0.5  | cell proliferation-cell cycle    | death                            |
| 1416828_at   | synaptosomal-associated protein 25                                               | Snap25        | 149 | 4376  | 16.5 | cell-cell signaling              | transport                        |
| 1452964_at   | tubulin tyrosine ligase-like family, member 11                                   | Ttl11         | 150 | 7718  | 8.5  | protein metabolism               | metabolism                       |
| 1450923_at   | transforming growth factor, beta 2                                               | Tgfb2         | 151 | 1482  | 4.5  | cell-cell signaling              | cell proliferation-cell cycle    |
| 1417932_at   | interleukin 18                                                                   | Il18          | 152 | 757   | 20.5 | cell adhesion                    | cell-cell signaling              |
| 1415918_a_at | triosephosphate isomerase 1                                                      | Tpi1          | 153 | 5     | 16.5 | metabolism                       |                                  |
| 1429251_at   | PR domain containing 2, with ZNF domain                                          | Prdm2         | 154 | 8448  | 4.5  |                                  |                                  |
| 1434487_at   | myocyte enhancer factor 2D                                                       | Mef2d         | 155 | 328   | 16.5 | RNA metabolism-transcription     | development                      |
| 1423078_a_at | sterol-C4-methyl oxidase-like                                                    | Sc4mol        | 156 | 280   | 4.5  | metabolism                       |                                  |
| 1422809_at   | regulating synaptic membrane exocytosis 2                                        | Rims2         | 157 | 48    | 8.5  | cell-cell signaling              | transport                        |
| 1454752_at   | similar to RNA binding motif protein 24                                          | LOC380843     | 158 | 6993  | 16.5 |                                  |                                  |
| 1437445_at   | transient receptor potential cation channel, subfamily M, member 1               | Trpm1         | 159 | 2021  | 8.5  | transport                        | metabolism                       |
| 1427612_at   | defensin beta 9                                                                  | Defb9         | 160 | 248   | 4.5  |                                  |                                  |
| 1422506_a_at | cystatin B                                                                       | Cstb          | 161 | 6542  | 4.5  |                                  |                                  |
| 1444487_at   | lecithin-retinol acyltransferase (phosphatidylcholine-retinol-O-acyltransferase) | Lrat#         | 162 | 597   | 12.5 | metabolism                       |                                  |
| 1448393_at   | claudin 7                                                                        | Cldn7         | 163 | 2301  | 4.5  | cell adhesion                    |                                  |
| 1439150_x_at | GH regulated TBC protein 1                                                       | Grtp1         | 164 | 94    | 4.5  |                                  |                                  |
| 1421087_at   | period homolog 3 (Drosophila)                                                    | Per3          | 165 | 44    | 8.5  | RNA metabolism-transcription     | signal transduction              |
| 1436818_a_at | Musashi homolog 2 (Drosophila)                                                   | Msi2          | 166 | 1458  | 4.5  |                                  |                                  |
| 1428763_at   | single-strand selective monofunctional uracil DNA glycosylase                    | Smug1         | 167 | 343   | 20.5 | DNA metabolism                   | stress response                  |
| 1443335_at   | PDZ domain containing RING finger 3                                              | Pdzr3         | 168 | 31876 | 16.5 | signal transduction              |                                  |
| 1450851_at   | WD repeat domain 1                                                               | Wdr1          | 169 | 1072  | 4.5  |                                  |                                  |
| 1448904_at   | DNA segment, Chr 6, Wayne State University 176, expressed                        | D6Wsu176e     | 170 | 346   | 8.5  |                                  |                                  |
| 1423145_a_at | titin-cap                                                                        | Tcap#         | 171 | 212   | 12.5 | development                      | cell organization and biogenesis |
| 1417168_a_at | ubiquitin specific peptidase 2                                                   | Usp2          | 172 | 506   | 12.5 | protein metabolism               | metabolism                       |
| 1453287_at   | RIKEN cDNA 5730557B15 gene                                                       | 5730557B15Rik | 173 | 297   | 4.5  |                                  |                                  |
| 1434034_at   | ceramide kinase                                                                  | Cerk          | 174 | 245   | 20.5 | signal transduction              | metabolism                       |
| 1455643_s_at | TSR1, 20S rRNA accumulation, homolog (yeast)                                     | Tsr1          | 175 | 1828  | 8.5  |                                  |                                  |
| 1435459_at   | flavin containing monooxygenase 2                                                | Fmo2          | 176 | 4359  | 12.5 | metabolism                       |                                  |
| 1426813_at   | LTV1 homolog (S. cerevisiae)                                                     | Ltv1          | 177 | 10906 | 4.5  |                                  |                                  |
| 1434096_at   | solute carrier family 4 (anion exchanger), member 4                              | Slc4a4        | 178 | 1833  | 12.5 | transport                        |                                  |
| 1451310_a_at | cathepsin L                                                                      | Ctsl          | 179 | 1999  | 0.5  | protein metabolism               | metabolism                       |
| 1449335_at   | tissue inhibitor of metalloproteinase 3                                          | Timp3         | 180 | 1819  | 12.5 | signal transduction              |                                  |
| 1449214_a_at | optic atrophy 1 homolog (human)                                                  | Opa1          | 181 | 32135 | 12.5 | death                            | transport                        |
| 1434376_at   | CD44 antigen                                                                     | Cd44          | 182 | 3048  | 0.5  | cell adhesion                    | development                      |
| 1434151_at   | methyltransferase like 7A                                                        | Mettl7a       | 183 | 10197 | 12.5 |                                  |                                  |
| 1417802_at   | RIKEN cDNA 1110032A04 gene                                                       | 1110032A04Rik | 184 | 23568 | 16.5 |                                  |                                  |
| 1417420_at   | cyclin D1                                                                        | Ccn1          | 185 | 442   | 12.5 | cell proliferation-cell cycle    | stress response                  |
| 1417324_at   | microtubule associated serine/threonine kinase 2                                 | Mast2         | 186 | 221   | 4.5  | development                      | signal transduction              |
| 1433761_at   | phosphodiesterase 4D interacting protein (myomegalin)                            | Pde4dip       | 187 | 580   | 16.5 |                                  |                                  |
| 1452732_at   | aspartic peptidase, retroviral-like 1                                            | Asprv1        | 188 | 19540 | 0.5  | development                      | protein metabolism               |
| 1419273_at   | expressed sequence C80913                                                        | C80913        | 189 | 216   | 8.5  | protein metabolism               | metabolism                       |
| 1457306_at   | Transcribed locus                                                                | ---           | 190 | 10072 | 20.5 |                                  |                                  |
| 1425933_a_at | 5'-nucleotidase, cytosolic II                                                    | Nt5c2         | 191 | 4956  | 8.5  |                                  |                                  |
| 1417841_at   | peroxisomal membrane protein 2                                                   | Pxmp2         | 192 | 24    | 8.5  | cell organization and biogenesis |                                  |
| 1434132_at   | RIKEN cDNA E430025E21 gene                                                       | E430025E21Rik | 193 | 8028  | 20.5 |                                  |                                  |
| 1450376_at   | Max interacting protein 1                                                        | Mxi1          | 194 | 188   | 12.5 | RNA metabolism-transcription     | metabolism                       |
| 1427482_a_at | carbonic anhydrase 8                                                             | Car8          | 195 | 540   | 12.5 | signal transduction              | metabolism                       |
| 1433913_at   | expressed sequence C80913                                                        | C80913        | 196 | 12836 | 4.5  | protein metabolism               | metabolism                       |
| 1435896_at   | sideroflexin 2                                                                   | Sfxn2         | 197 | 895   | 12.5 | transport                        |                                  |
| 1450387_s_at | adenylate kinase 3 alpha-like 1                                                  | Ak3l1         | 198 | 113   | 12.5 | metabolism                       |                                  |
| 1417244_a_at | interferon regulatory factor 7                                                   | Irf7          | 199 | 20    | 16.5 | RNA metabolism-transcription     | protein metabolism               |
| 1440605_at   | fascin homolog 2, actin-binding protein, retinal (Strongylocentrotus purpuratus) | Fscn2         | 200 | 174   | 8.5  | development                      | cell organization and biogenesis |
| 1417169_at   | ubiquitin specific peptidase 2                                                   | Usp2          | 201 | 287   | 8.5  | protein metabolism               | metabolism                       |
| 1418300_a_at | MAP kinase-interacting serine/threonine kinase 2                                 | Mknk2         | 202 | 430   | 8.5  | stress response                  | signal transduction              |
| 1416468_at   | aldehyde dehydrogenase family 1, subfamily A1                                    | Aldha1a1      | 203 | 354   | 12.5 | death                            | development                      |
| 1428375_at   | RIKEN cDNA 4932415G12 gene                                                       | 4932415G12Rik | 204 | 9591  | 8.5  |                                  |                                  |
| 1456542_s_at | glutamyl-tRNA synthase (glutamine-hydrolyzing)-like 1                            | Qrs1          | 205 | 421   | 4.5  | protein metabolism               | metabolism                       |
| 1450672_a_at | three prime repair exonuclease 1                                                 | Trex1         | 206 | 1859  | 20.5 | DNA metabolism                   | stress response                  |
| 1449181_at   | ferrochelatase                                                                   | Fech          | 207 | 13574 | 8.5  | metabolism                       |                                  |
| 1423804_a_at | isopentenyl-diphosphate delta isomerase                                          | Idi1          | 208 | 369   | 4.5  | metabolism                       |                                  |
| 1420655_at   | patatin-like phospholipase domain containing 3                                   | Pnplp3        | 209 | 491   | 20.5 | metabolism                       |                                  |
| 1450771_at   | fucosyltransferase 9                                                             | Fut9          | 210 | 18262 | 4.5  | protein metabolism               | metabolism                       |
| 1430170_at   | Bardet-Biedl syndrome 10 (human)                                                 | Bbs10         | 211 | 40978 | 4.5  | protein metabolism               | metabolism                       |

|              |                                                                                         |               |     |       |      |                               |                                  |
|--------------|-----------------------------------------------------------------------------------------|---------------|-----|-------|------|-------------------------------|----------------------------------|
| 1420106_at   | DNA Segment, Chr 9, Mouse Genome Informatics 7                                          | D9Mgi7        | 212 | 13356 | 16.5 |                               |                                  |
| 1452796_at   | differentially expressed in FDCCP 6                                                     | Def6          | 213 | 21434 | 0.5  |                               |                                  |
| 1418934_at   | mab-21-like 2 (C. elegans)                                                              | Mab21I2       | 214 | 6633  | 0.5  | cell proliferation-cell cycle | development                      |
| 1434019_at   | PDGFA associated protein 1                                                              | Pdap1         | 215 | 25639 | 8.5  | cell proliferation-cell cycle | signal transduction              |
| 1455180_at   | expressed sequence AA407270                                                             | AA407270      | 216 | 3890  | 20.5 |                               |                                  |
| 1453317_a_at | KH domain containing, RNA binding, signal transduction associated 3                     | Khdrbs3       | 217 | 994   | 16.5 | RNA metabolism-transcription  | metabolism                       |
| 1417860_a_at | spondin 2, extracellular matrix protein                                                 | Spon2         | 218 | 220   | 0.5  | cell adhesion                 | development                      |
| 1425891_a_at | GH regulated TBC protein 1                                                              | Grtp1         | 219 | 664   | 4.5  |                               |                                  |
| 1449324_at   | ERO1-like (S. cerevisiae)                                                               | Ero1l         | 220 | 104   | 12.5 | stress response               | transport                        |
| 1420820_at   | RIKEN cDNA 2900073G15 gene                                                              | 2900073G15Rik | 221 | 1556  | 12.5 |                               |                                  |
| 1450522_a_at | H1 histone family, member 0                                                             | H1f0          | 222 | 708   | 8.5  | DNA metabolism                | cell organization and biogenesis |
| 1457254_x_at | RIKEN cDNA 6330442E10 gene                                                              | 6330442E10Rik | 223 | 226   | 16.5 |                               |                                  |
| 1449628_s_at | START domain containing 7                                                               | Stard7        | 224 | 324   | 0.5  |                               |                                  |
| 1418025_at   | basic helix-loop-helix domain containing, class B2                                      | Bhlhb2        | 225 | 1234  | 8.5  | RNA metabolism-transcription  | metabolism                       |
| 1449733_s_at | seven in absentia 1A                                                                    | Siah1a        | 226 | 5998  | 8.5  | cell proliferation-cell cycle | death                            |
| 1449046_a_at | Josephin domain containing 2                                                            | Josd2         | 227 | 5223  | 16.5 |                               |                                  |
| 1435392_at   | WD repeat domain 17                                                                     | Wdr17         | 228 | 142   | 8.5  |                               |                                  |
| 1420562_at   | secreted Ly6/Plaur domain containing 1                                                  | Slurp1        | 229 | 492   | 12.5 | cell adhesion                 |                                  |
| 1415889_a_at | heat shock protein 90kDa beta (Grp94), member 1                                         | Hsp90b1       | 230 | 655   | 16.5 | DNA metabolism                | stress response                  |
| 1416407_at   | phosphoprotein enriched in astrocytes 15                                                | Pea15         | 231 | 633   | 0.5  | death                         | transport                        |
| 1433445_x_at | 3-hydroxy-3-methylglutaryl-Coenzyme A synthase 1                                        | Hmgcs1        | 232 | 81    | 4.5  | metabolism                    |                                  |
| 1448705_at   | zinc finger and BTB domain containing 22                                                | Zbtb22        | 233 | 2236  | 0.5  | RNA metabolism-transcription  | metabolism                       |
| 1417864_at   | phosphoglycerate kinase 1                                                               | Pgk1          | 234 | 25    | 16.5 | metabolism                    |                                  |
| 1448698_at   | cyclin D1                                                                               | Cnd1          | 235 | 2118  | 12.5 | cell proliferation-cell cycle | stress response                  |
| 1438033_at   | thyrotroph embryonic factor                                                             | Tef           | 236 | 1692  | 8.5  | RNA metabolism-transcription  | metabolism                       |
| 1423684_at   | heterogeneous nuclear ribonucleoprotein K                                               | Hnrpk         | 237 | 9446  | 8.5  | RNA metabolism-transcription  | metabolism                       |
| 1458506_at   | gene model 1582, (NCBI)                                                                 | Gm1582        | 238 | 167   | 16.5 |                               |                                  |
| 1428889_at   | alkB, alkylation repair homolog 3 (E. coli)                                             | Alkbh3        | 239 | 357   | 0.5  |                               |                                  |
| 1425729_at   | bestrophin 2                                                                            | Best2         | 240 | 40677 | 12.5 | transport                     |                                  |
| 1423108_at   | solute carrier family 25 (mitochondrial carnitine/acylcarnitine translocase), member 20 | Slc25a20      | 241 | 13165 | 0.5  | transport                     |                                  |
| 1460458_at   | cysteine-rich secretory protein LCCL domain containing 2                                | Crispld2      | 242 | 7209  | 0.5  |                               |                                  |
| 1436432_at   | RIKEN cDNA B230343J05 gene                                                              | B230343J05Rik | 243 | 13330 | 4.5  |                               |                                  |
| 1423707_at   | transmembrane protein 50B                                                               | Tmem50b       | 244 | 8020  | 16.5 |                               |                                  |
| 1419029_at   | ERO1-like (S. cerevisiae)                                                               | Ero1l         | 245 | 1930  | 16.5 | stress response               | transport                        |
| 1428095_a_at | transmembrane protein 24                                                                | Tmem24        | 246 | 791   | 12.5 |                               |                                  |
| 1418932_at   | nuclear factor, interleukin 3, regulated                                                | NfiI3         | 247 | 866   | 20.5 | RNA metabolism-transcription  | metabolism                       |
| 1437302_at   | adrenergic receptor, beta 2                                                             | Adrb2         | 248 | 273   | 12.5 | RNA metabolism-transcription  | stress response                  |
| 1455821_x_at | complement component 1, q subcomponent binding protein                                  | C1qbp         | 249 | 2563  | 8.5  | stress response               | protein metabolism               |
| 1431327_at   | vacuolar protein sorting 13A (yeast)                                                    | Vps13a        | 250 | 41011 | 8.5  | development                   |                                  |
| 1425728_at   | ---                                                                                     | ---           | 251 | 26046 | 16.5 |                               |                                  |
| 1416933_at   | P450 (cytochrome) oxidoreductase                                                        | Por           | 252 | 15720 | 8.5  | metabolism                    |                                  |
| 1430147_a_at | Josephin domain containing 3                                                            | Josd3         | 253 | 26960 | 12.5 |                               |                                  |
| 1448816_at   | prostaglandin I2 (prostacyclin) synthase                                                | Ptgis         | 254 | 5738  | 8.5  | metabolism                    |                                  |
| 1450110_at   | alcohol dehydrogenase 7 (class IV), mu or sigma polypeptide                             | Adh7          | 255 | 10101 | 16.5 | metabolism                    |                                  |
| 1418894_s_at | pre B-cell leukemia transcription factor 2                                              | Pbx2          | 256 | 4599  | 20.5 | RNA metabolism-transcription  | development                      |
| 1426684_at   | CCR4-NOT transcription complex, subunit 6                                               | Cnot6         | 257 | 3076  | 16.5 | RNA metabolism-transcription  | protein metabolism               |
| 1455789_x_at | heat shock protein 8                                                                    | Hspa8         | 258 | 3315  | 16.5 | cell proliferation-cell cycle | stress response                  |
| 1431788_at   | RIKEN cDNA 1700008G05 gene                                                              | 1700008G05Rik | 259 | 131   | 20.5 | transport                     |                                  |
| 1431692_a_at | Casitas B-lineage lymphoma c                                                            | Cblc          | 260 | 5172  | 0.5  | signal transduction           | protein metabolism               |
| 1425142_a_at | heterogeneous nuclear ribonucleoprotein D                                               | Hnrpd         | 261 | 16399 | 4.5  | RNA metabolism-transcription  | metabolism                       |
| 1451862_a_at | perforin 1 (pore forming protein)                                                       | Prf1          | 262 | 8540  | 16.5 | death                         |                                  |
| 1425041_at   | LIM homeobox protein 3                                                                  | Lhx3          | 263 | 32229 | 4.5  | RNA metabolism-transcription  | metabolism                       |
| 1448830_at   | dual specificity phosphatase 1                                                          | Dusp1         | 264 | 767   | 12.5 | cell proliferation-cell cycle | stress response                  |
| 1421811_at   | thrombospondin 1                                                                        | Thbs1         | 265 | 501   | 12.5 | cell adhesion                 | stress response                  |
| 1429139_at   | OTU domain containing 7B                                                                | Otd7b         | 266 | 2886  | 20.5 | protein metabolism            | metabolism                       |
| 1435866_s_at | histone cluster 3, H2a                                                                  | Hist3h2a      | 267 | 2595  | 12.5 | DNA metabolism                | cell organization and biogenesis |
| 1437313_x_at | high mobility group box 2                                                               | Hmgb2         | 268 | 197   | 4.5  | DNA metabolism                | RNA metabolism-transcription     |
| 1454841_at   | RIKEN cDNA 4921511H13 gene                                                              | 4921511H13Rik | 269 | 21758 | 8.5  |                               |                                  |
| 1421084_at   | retinoschisis (X-linked, juvenile) 1 (human)                                            | Rs1           | 270 | 214   | 12.5 | cell adhesion                 | development                      |
| 1419340_at   | Moloney leukemia virus 10-like 1                                                        | Mov10l1       | 271 | 9862  | 20.5 | cell proliferation-cell cycle | development                      |
| 1439098_at   | RIKEN cDNA E230013L22 gene                                                              | E230013L22Rik | 272 | 41166 | 12.5 |                               |                                  |
| 1444403_at   | Core-binding factor, runt domain, alpha subunit 2, translocated to, 2 (human)           | Cbfa2l2       | 273 | 20484 | 20.5 | RNA metabolism-transcription  | development                      |
| 1417010_at   | zinc finger protein 238                                                                 | Zfp238        | 274 | 1352  | 4.5  | RNA metabolism-transcription  | transport                        |
| 1428891_at   | ---                                                                                     | ---           | 275 | 2184  | 4.5  |                               |                                  |
| 1446068_at   | adenosine kinase                                                                        | Adk           | 276 | 31469 | 8.5  | metabolism                    |                                  |
| 1424118_a_at | spindle pole body component 25 homolog (S. cerevisiae)                                  | Spbc25        | 277 | 57    | 20.5 | cell proliferation-cell cycle |                                  |
