# Supplementary material
Source: PubMed Central journal article supplement (PMC2040024)
Supplement: NIHMS29626-supplement-03.pdf [file NIHMS29626-supplement-03.pdf]

| probe.set    | Gene Title                                                                      | Gene Symbol    | LD rank | DD rank | Phase (ZT) | Biological process I             | Biological process II            |
|--------------|---------------------------------------------------------------------------------|----------------|---------|---------|------------|----------------------------------|----------------------------------|
| AFFX-GapdhM  | similar to glyceraldehyde-3-phosphate dehydrogenase                             | Gapd           | 1       | 404     | 20.5       |                                  | metabolism                       |
| 1415696_at   | SAR1 gene homolog A (S. cerevisiae)                                             | Sar1a          | 2       | 31692   | 20.5       | transport                        | development                      |
| 1415779_s_at | actin, gamma, cytoplasmic 1                                                     | Act1           | 3       | 1       | 4.5        | development                      | cell organization and biogenesis |
| 1415822_at   | stearoyl-Coenzyme A desaturase 2                                                | Scd2           | 4       | 1578    | 4.5        | metabolism                       |                                  |
| 1415918_a_at | triosephosphate isomerase 1                                                     | Tpi1           | 5       | 153     | 16.5       | metabolism                       |                                  |
| 1415984_at   | acyl-Coenzyme A dehydrogenase, medium chain                                     | Acadm          | 6       | 2       | 12.5       | metabolism                       |                                  |
| 1415993_at   | squalene epoxidase                                                              | Sqle           | 7       | 65      | 4.5        | metabolism                       |                                  |
| 1416069_at   | phosphofructokinase, platelet                                                   | Pfkp           | 8       | 301     | 20.5       | metabolism                       |                                  |
| 1416178_a_at | pleckstrin homology domain containing, family B (evectins) member 1             | Pleckhb1###    | 9       | 3       | 16.5       |                                  |                                  |
| 1416203_at   | aquaporin 1                                                                     | Aqp1           | 10      | 4       | 20.5       | transport                        |                                  |
| 1416256_a_at | tubulin, beta 5                                                                 | Tubb5          | 11      | 91      | 20.5       | cell proliferation-cell cycle    | death                            |
| 1416332_at   | cold inducible RNA binding protein                                              | Cirbp          | 12      | 74      | 8.5        | stress response                  |                                  |
| 1416335_at   | macrophage migration inhibitory factor                                          | Mif            | 13      | 443     | 16.5       | cell proliferation-cell cycle    | stress response                  |
| 1416480_a_at | HIG1 domain family, member 1A                                                   | Hig1a          | 14      | 28707   | 16.5       |                                  |                                  |
| 1416921_x_at | aldolase 1, A isoform                                                           | Aldoa          | 15      | 1101    | 20.5       | metabolism                       |                                  |
| 1416953_at   | connective tissue growth factor                                                 | Ctg#           | 16      | 5       | 12.5       | cell adhesion                    | DNA metabolism                   |
| 1416956_at   | potassium voltage-gated channel, shaker-related subfamily, beta member 2        | Kcnab2         | 17      | 6639    | 20.5       | transport                        |                                  |
| 1416958_at   | nuclear receptor subfamily 1, group D, member 2                                 | Nr1d2#         | 18      | 49      | 8.5        | RNA metabolism-transcription     | metabolism                       |
| 1417161_at   | CDK2-associated protein 2                                                       | Cdk2ap2        | 19      | 7201    | 0.5        |                                  |                                  |
| 1417244_a_at | interferon regulatory factor 7                                                  | Irf7###        | 20      | 199     | 16.5       | RNA metabolism-transcription     | protein metabolism               |
| 1417308_at   | pyruvate kinase, muscle                                                         | Pkm2           | 21      | 718     | 20.5       | metabolism                       |                                  |
| 1417429_at   | flavin containing monooxygenase 1                                               | Fmo1###        | 22      | 73      | 12.5       | transport                        | metabolism                       |
| 1417602_at   | period homolog 2 (Drosophila)                                                   | Per2###        | 23      | 6       | 8.5        | RNA metabolism-transcription     | signal transduction              |
| 1417841_at   | peroxisomal membrane protein 2                                                  | Pxmp2          | 24      | 192     | 12.5       | cell organization and biogenesis |                                  |
| 1417864_at   | phosphoglycerate kinase 1                                                       | Pgk1           | 25      | 234     | 16.5       | metabolism                       |                                  |
| 1418174_at   | D site albumin promoter binding protein                                         | Dbp            | 26      | 7       | 8.5        | RNA metabolism-transcription     | metabolism                       |
| 1418250_at   | ADP-ribosylation factor 4-like                                                  | Arl4           | 27      | 4727    | 20.5       | transport                        | signal transduction              |
| 1418406_at   | phosphodiesterase 8A                                                            | Pde8a###       | 28      | 306     | 16.5       | RNA metabolism-transcription     | signal transduction              |
| 1418705_at   | cone-rod homeobox containing gene                                               | Crx            | 29      | 87      | 20.5       | RNA metabolism-transcription     | development                      |
| 1418752_at   | aldehyde dehydrogenase family 3, subfamily A1                                   | Aldh3a1        | 30      | 464     | 12.5       | metabolism                       |                                  |
| 1418829_a_at | enolase 2, gamma neuronal                                                       | Eno2           | 31      | 8       | 20.5       | metabolism                       |                                  |
| 1418839_at   | glomulin, FKBP associated protein                                               | Glmn###        | 32      | 9       | 12.5       | cell proliferation-cell cycle    | development                      |
| 1419025_at   | retinal S-antigen                                                               | Sag###         | 33      | 10      | 12.5       | signal transduction              |                                  |
| 1419231_s_at | RIKEN cDNA A830036E02 gene                                                      | A830036E02Rik  | 34      | 772     | 8.5        |                                  |                                  |
| 1419647_a_at | immediate early response 3                                                      | Ier3           | 35      | 2139    | 16.5       |                                  |                                  |
| 1419737_a_at | lactate dehydrogenase A                                                         | Ldha           | 36      | 885     | 16.5       | metabolism                       |                                  |
| 1419740_at   | phosphodiesterase 6B, cGMP, rod receptor, beta polypeptide                      | Pde6b          | 37      | 11      | 4.5        | signal transduction              |                                  |
| 1420147_at   | expressed sequence AA407331                                                     | AA407331       | 38      | 12      | 12.5       |                                  |                                  |
| 1420505_a_at | syntaxin binding protein 1                                                      | Stxbp1#        | 39      | 13      | 8.5        | transport                        | development                      |
| 1420623_x_at | heat shock protein 8                                                            | Hspa8          | 40      | 48      | 16.5       | cell proliferation-cell cycle    | stress response                  |
| 1420772_a_at | TSC22 domain family 3                                                           | Tsc2d3#        | 41      | 14      | 12.5       | death                            | RNA metabolism-transcription     |
| 1420997_a_at | glucose phosphate isomerase 1                                                   | Gpi1           | 42      | 4396    | 16.5       | metabolism                       |                                  |
| 1421061_at   | guanylate cyclase activator 1a (retina)                                         | Guca1a         | 43      | 15      | 12.5       |                                  |                                  |
| 1421087_at   | period homolog 3 (Drosophila)                                                   | Per3           | 44      | 165     | 8.5        | RNA metabolism-transcription     | signal transduction              |
| 1421096_at   | transient receptor potential cation channel, subfamily C, member 1              | Trpc1###       | 45      | 16      | 8.5        | transport                        |                                  |
| 1422521_at   | dynactin 1                                                                      | Dctn1          | 46      | 12945   | 20.5       | cell proliferation-cell cycle    | development                      |
| 1422612_at   | hexokinase 2                                                                    | Hk2            | 47      | 8058    | 16.5       | cell proliferation-cell cycle    | metabolism                       |
| 1422809_at   | regulating synaptic membrane exocytosis 2                                       | Rims2###       | 48      | 157     | 4.5        | cell-cell signaling              | transport                        |
| 1422829_at   | dopamine receptor 4                                                             | Drd4           | 49      | 1908    | 20.5       | signal transduction              |                                  |
| 1422830_s_at | dopamine receptor 4                                                             | Drd4###        | 50      | 136     | 20.5       | signal transduction              |                                  |
| 1423210_a_at | nucleolar protein family A, member 3                                            | Nola3          | 51      | 550     | 16.5       | RNA metabolism-transcription     | cell organization and biogenesis |
| 1423233_at   | CCAAT/enhancer binding protein (C/EBP), delta                                   | Cebpd          | 52      | 1415    | 12.5       | RNA metabolism-transcription     | metabolism                       |
| 1423437_at   | glutathione S-transferase, alpha 3                                              | Gsta3          | 53      | 518     | 16.5       | metabolism                       |                                  |
| 1423449_a_at | actinin alpha 4                                                                 | Actn4          | 54      | 530     | 4.5        | cell proliferation-cell cycle    | death                            |
| 1423631_at   | nuclear receptor subfamily 2, group E, member 3                                 | Nr2e3          | 55      | 122     | 4.5        | cell proliferation-cell cycle    | RNA metabolism-transcription     |
| 1423938_at   | lethal giant larvae homolog 2 (Drosophila)                                      | Lgl2           | 56      | 14878   | 0.5        | cell proliferation-cell cycle    |                                  |
| 1424118_a_at | spindle pole body component 25 homolog (S. cerevisiae)                          | Spbc25         | 57      | 277     | 20.5       | cell proliferation-cell cycle    |                                  |
| 1424175_at   | thyrotroph embryonic factor                                                     | Tef            | 58      | 17      | 12.5       | RNA metabolism-transcription     | metabolism                       |
| 1424305_at   | immunoglobulin joining chain                                                    | Igj            | 59      | 2614    | 8.5        |                                  |                                  |
| 1424977_at   | RIKEN cDNA 4930418G15 gene                                                      | 4930418G15Rik  | 60      | 10972   | 16.5       |                                  |                                  |
| 1425058_at   | zinc finger protein 472                                                         | Zfp472         | 61      | 2063    | 16.5       | RNA metabolism-transcription     | metabolism                       |
| 1425232_x_at | arrestin 3, retinal                                                             | Arr3           | 62      | 347     | 12.5       | transport                        | signal transduction              |
| 1425281_a_at | TSC22 domain family 3                                                           | Tsc2d3         | 63      | 18      | 12.5       | death                            | RNA metabolism-transcription     |
| 1425306_at   | cDNA sequence BC027072                                                          | BC027072       | 64      | 44      | 4.5        |                                  |                                  |
| 1425382_a_at | aquaporin 4                                                                     | Aqp4###        | 65      | 2648    | 0.5        | transport                        | development                      |
| 1425408_a_at | RIKEN cDNA 2610034M16 gene                                                      | 2610034M16Rik# | 66      | 83      | 4.5        | transport                        | cell organization and biogenesis |
| 1425557_x_at | TSC22 domain family 3                                                           | Tsc2d3         | 67      | 19      | 12.5       | death                            | RNA metabolism-transcription     |
| 1425678_a_at | SNF related kinase                                                              | Snrk           | 68      | 2189    | 16.5       | death                            | development                      |
| 1425757_a_at | interphotoreceptor matrix proteoglycan 1                                        | Impg1          | 69      | 1735    | 20.5       |                                  |                                  |
| 1426500_at   | isoprenylcysteine carboxyl methyltransferase                                    | Icmt           | 70      | 296     | 20.5       | transport                        | cell organization and biogenesis |
| 1426517_at   | guanine nucleotide binding protein, alpha z subunit                             | Gnaz           | 71      | 80      | 16.5       | signal transduction              |                                  |
| 1426554_a_at | phosphoglycerate mutase 1                                                       | Pgam1          | 72      | 307     | 16.5       | metabolism                       |                                  |
| 1426621_a_at | protein phosphatase 2 (formerly 2A), regulatory subunit B (PR 52), beta isoform | Ppp2r2b#       | 73      | 147     | 4.5        | signal transduction              |                                  |
| 1426645_at   | heat shock protein 90kDa alpha (cytosolic), class A member 1                    | Hsp90aa1       | 74      | 43      | 20.5       | stress response                  | development                      |
| 1426817_at   | antigen identified by monoclonal antibody Ki 67                                 | Mki67          | 75      | 779     | 0.5        | cell proliferation-cell cycle    |                                  |
| 1427075_s_at | protein-L-isoaspartate (D-aspartate) O-methyltransferase domain containing 2    | Pcmtd2         | 76      | 20      | 4.5        | protein metabolism               | metabolism                       |
| 1427229_at   | 3-hydroxy-3-methylglutaryl-Coenzyme A reductase                                 | Hmgcr          | 77      | 309     | 4.5        | development                      | metabolism                       |
| 1428306_at   | DNA-damage-inducible transcript 4                                               | Ddit4          | 78      | 1699    | 16.5       |                                  |                                  |
| 1430634_a_at | phosphofructokinase, platelet                                                   | Pfkp           | 79      | 957     | 20.5       | metabolism                       |                                  |
| 1433443_a_at | 3-hydroxy-3-methylglutaryl-Coenzyme A synthase 1                                | Hmgcs1         | 80      | 356     | 4.5        | metabolism                       |                                  |
| 1433445_x_at | 3-hydroxy-3-methylglutaryl-Coenzyme A synthase 1                                | Hmgcs1         | 81      | 232     | 4.5        | metabolism                       |                                  |
| 1433604_x_at | aldolase 1, A isoform                                                           | Aldoa          | 82      | 372     | 20.5       | metabolism                       |                                  |
| 1433691_at   | protein phosphatase 1, regulatory (inhibitor) subunit 3C                        | Ppp1r3c        | 83      | 457     | 0.5        | transport                        | cell organization and biogenesis |
| 1434799_x_at | aldolase 1, A isoform                                                           | Aldoa          | 84      | 96      | 20.5       | metabolism                       |                                  |
| 1434814_x_at | glucose phosphate isomerase 1                                                   | Gpi1           | 85      | 4887    | 16.5       | metabolism                       |                                  |
| 1434866_x_at | carnitine palmitoyltransferase 1a, liver                                        | Cpt1a          | 86      | 5100    | 8.5        | transport                        | metabolism                       |
| 1435659_a_at | triosephosphate isomerase 1                                                     | Tpi1           | 87      | 1287    | 16.5       | signal transduction              | metabolism                       |
| 1436402_at   | deoxyhypusine hydroxylase/monooxygenase                                         | Dohh           | 88      | 801     | 20.5       | protein metabolism               | metabolism                       |
| 1437497_a_at | heat shock protein 90kDa alpha (cytosolic), class A member 1                    | Hsp90aa1       | 89      | 1269    | 16.5       | stress response                  | development                      |
| 1437711_x_at | ornithine decarboxylase, structural 1                                           | Odc1#          | 90      | 59      | 4.5        | cell proliferation-cell cycle    | development                      |
| 1438009_at   | similar to histone 2a                                                           | MGC73635       | 91      | 21      | 20.5       | DNA metabolism                   | cell organization and biogenesis |
| 1438211_s_at | D site albumin promoter binding protein                                         | Dbp###         | 92      | 22      | 8.5        | RNA metabolism-transcription     | metabolism                       |
| 1438640_x_at | phosphoglycerate kinase 1                                                       | Pgk1           | 93      | 2154    | 16.5       | metabolism                       |                                  |
| 1439150_x_at | GH regulated TBC protein 1                                                      | Grtp1          | 94      | 164     | 0.5        |                                  |                                  |
| 1439375_x_at | aldolase 1, A isoform (1)                                                       | Aldoa          | 95      | 1207    | 20.5       | metabolism                       |                                  |
| 1439435_x_at | phosphoglycerate kinase 1                                                       | Pgk1           | 96      | 960     | 16.5       | metabolism                       |                                  |
| 1439959_at   | fibroblast growth factor 11                                                     | Fgf11          | 97      | 9539    | 20.5       |                                  |                                  |
| 1442025_a_at | ---                                                                             | ---            | 98      | 831     | 12.5       |                                  |                                  |
| 1448130_at   | farnesyl diphosphate farnesyl transferase 1                                     | Fdft1          | 99      | 3123    | 4.5        | metabolism                       |                                  |
| 1448278_at   | XPA binding protein 2                                                           | Xab2           | 100     | 4141    | 8.5        | DNA metabolism                   | RNA metabolism-transcription     |
| 1448390_a_at | dehydrogenase/reductase (SDR family) member 3                                   | Dhrs3          | 101     | 1275    | 16.5       | metabolism                       |                                  |
| 1448429_at   | glycogenin                                                                      | Gyg            | 102     | 302     | 0.5        | metabolism                       |                                  |
| 1449005_at   | solute carrier family 16 (monocarboxylic acid transporters), member 3           | Slc16a3        | 103     | 18359   | 16.5       | transport                        |                                  |
| 1449324_at   | ERO1-like (S. cerevisiae)                                                       | Ero1l          | 104     | 220     | 16.5       | stress response                  | transport                        |
| 1449340_at   | sclerostin domain containing 1                                                  | Sostdc1        | 105     | 627     | 20.5       | development                      | signal transduction              |
| 1449347_a_at | X-linked lymphocyte-regulated 4B                                                | Xlr4b          | 106     | 583     | 0.5        |                                  |                                  |
| 1449434_at   | carbonic anhydrase 3                                                            | Car3           | 107     | 78      | 8.5        | metabolism                       |                                  |

|              |                                                                                                    |               |     |       |      |                               |
|--------------|----------------------------------------------------------------------------------------------------|---------------|-----|-------|------|-------------------------------|
| 1449768_at   | ---                                                                                                | ---           | 108 | 27019 | 12.5 |                               |
| 1449974_at   | glyceraldehyde-3-phosphate dehydrogenase, spermatogenic                                            | Gapdhs        | 109 | 6591  | 20.5 | metabolism                    |
| 1450081_x_at | glucose phosphate isomerase 1                                                                      | Gpi1          | 110 | 1655  | 16.5 | metabolism                    |
| 1450215_at   | recoverin                                                                                          | Rcvrn         | 111 | 23    | 20.5 | transport                     |
| 1450329_a_at | arrestin 3, retinal                                                                                | Arr3###       | 112 | 117   | 8.5  | transport                     |
| 1450387_s_at | adenylate kinase 3 alpha-like 1                                                                    | Ak3l1         | 113 | 198   | 16.5 | metabolism                    |
| 1450761_s_at | regulating synaptic membrane exocytosis 2                                                          | Rims2         | 114 | 709   | 4.5  | cell-cell signaling           |
| 1450779_at   | fatty acid binding protein 7, brain                                                                | Fabp7         | 115 | 2122  | 0.5  | transport                     |
| 1451012_a_at | cold shock domain protein A                                                                        | Csda          | 116 | 319   | 20.5 | RNA metabolism-transcription  |
| 1451122_at   | isopentenyl-diphosphate delta isomerase                                                            | Idi1          | 117 | 322   | 4.5  | metabolism                    |
| 1451286_s_at | FUS, derived from t(12;16) malignant liposarcoma (human)                                           | Fus           | 118 | 386   | 4.5  | RNA metabolism-transcription  |
| 1451358_a_at | Rac GTPase-activating protein 1                                                                    | Racgap1       | 119 | 9591  | 0.5  | cell proliferation-cell cycle |
| 1451385_at   | RIKEN cDNA 2310056P07 gene                                                                         | 2310056P07Rik | 120 | 12662 | 16.5 |                               |
| 1451417_at   | breast cancer 1                                                                                    | Brc1          | 121 | 10657 | 20.5 | cell proliferation-cell cycle |
| 1451695_a_at | glutathione peroxidase 4                                                                           | Gpx4          | 122 | 10644 | 20.5 | DNA metabolism                |
| 1452499_a_at | kinesin family member 2A                                                                           | Kif2a         | 123 | 54    | 20.5 | transport                     |
| 1452773_at   | RIKEN cDNA 5730494N06 gene                                                                         | 5730494N06Rik | 124 | 8805  | 20.5 |                               |
| 1452927_x_at | triosephosphate isomerase 1                                                                        | Tpi1          | 125 | 106   | 16.5 | metabolism                    |
| 1452954_at   | ubiquitin-conjugating enzyme E2C                                                                   | Ube2c         | 126 | 937   | 0.5  | cell proliferation-cell cycle |
| 1455422_x_at | septin 4                                                                                           | Sep4          | 127 | 29780 | 20.5 | cell proliferation-cell cycle |
| 1460256_at   | carbonic anhydrase 3                                                                               | Car3          | 128 | 1147  | 12.5 | metabolism                    |
| 1428866_at   | RIKEN cDNA 2810037O22 gene                                                                         | 2810037O22Rik | 129 | 397   | 20.5 |                               |
| 1429778_at   | optineurin                                                                                         | Optrn         | 130 | 6064  | 20.5 |                               |
| 1431788_at   | RIKEN cDNA 1700008G05 gene                                                                         | 1700008G05Rik | 131 | 259   | 20.5 | transport                     |
| 1432885_at   | RIKEN cDNA 4632432E15 gene                                                                         | 4632432E15Rik | 132 | 660   | 16.5 |                               |
| 1433819_s_at | 1-acylglycerol-3-phosphate O-acyltransferase 3                                                     | Agpat3        | 133 | 144   | 20.5 | metabolism                    |
| 1434129_s_at | lipoma HMGIC fusion partner-like 2                                                                 | Lhfp12        | 134 | 2507  | 0.5  | metabolism                    |
| 1434504_at   | zinc finger, FYVE domain containing 28                                                             | Zfyve28       | 135 | 924   | 20.5 | transport                     |
| 1434572_at   | histone deacetylase 9                                                                              | Hdac9         | 136 | 53    | 4.5  | cell proliferation-cell cycle |
| 1434603_at   | thyroid hormone receptor associated protein 2                                                      | Thrap2###     | 137 | 24    | 4.5  | RNA metabolism-transcription  |
| 1435096_at   | resistance to inhibitors of cholinesterase 8 homolog B (C. elegans)                                | Ric8b         | 138 | 1664  | 16.5 |                               |
| 1435189_at   | FERM and PDZ domain containing 1                                                                   | Frmpl1        | 139 | 112   | 20.5 | signal transduction           |
| 1435268_at   | guanine nucleotide binding protein, alpha z subunit                                                | Gnaz###       | 140 | 300   | 20.5 | signal transduction           |
| 1435303_at   | TAF4B RNA polymerase II, TATA box binding protein (TBP)-associated factor                          | Taf4b         | 141 | 586   | 4.5  | RNA metabolism-transcription  |
| 1435392_at   | WD repeat domain 17                                                                                | Wdr17         | 142 | 228   | 8.5  |                               |
| 1435672_at   | hypothetical protein 3830612M24                                                                    | 3830612M24    | 143 | 12874 | 4.5  |                               |
| 1436215_at   | inositol polyphosphate multikinase                                                                 | Ipmk          | 144 | 31665 | 16.5 | development                   |
| 1436338_at   | ---                                                                                                | ---           | 145 | 114   | 16.5 |                               |
| 1436470_at   | regulating synaptic membrane exocytosis 2                                                          | Rims2         | 146 | 76    | 4.5  | cell-cell signaling           |
| 1436657_at   | hypothetical protein LOC629972                                                                     | LOC629972     | 147 | 956   | 20.5 |                               |
| 1437977_at   | Small glutamine-rich tetratricopeptide repeat (TPR)-containing, beta                               | Sgtb          | 148 | 3915  | 20.5 |                               |
| 1440838_at   | Expressed sequence AI852064                                                                        | AI852064      | 149 | 359   | 16.5 |                               |
| 1442326_at   | protocadherin 15                                                                                   | Pcdh15        | 150 | 408   | 16.5 | cell adhesion                 |
| 1443694_at   | Regulator of G-protein signaling 20                                                                | Rgs20#        | 151 | 88    | 8.5  | signal transduction           |
| 1444172_at   | Transcribed locus                                                                                  | ---           | 152 | 51    | 20.5 |                               |
| 1444317_at   | protocadherin 15                                                                                   | Pcdh15#       | 153 | 40    | 12.5 | cell adhesion                 |
| 1444472_at   | SNF1-like kinase 2                                                                                 | Snf1lk2       | 154 | 25    | 16.5 | signal transduction           |
| 1447607_at   | ---                                                                                                | ---           | 155 | 32388 | 12.5 |                               |
| 1453068_at   | PR domain containing 2, with ZNF domain                                                            | Prdm2         | 156 | 534   | 12.5 |                               |
| 1453782_at   | RIKEN cDNA 3021401C12 gene                                                                         | 3021401C12Rik | 157 | 111   | 4.5  |                               |
| 1454051_at   | RIKEN cDNA 2600011E07 gene                                                                         | 2600011E07Rik | 158 | 384   | 16.5 |                               |
| 1455033_at   | RIKEN cDNA B430201A12 gene                                                                         | B430201A12Rik | 159 | 131   | 8.5  |                               |
| 1455554_at   | RIKEN cDNA A830039N20 gene                                                                         | A830039N20Rik | 160 | 4648  | 4.5  |                               |
| 1455799_at   | RAR-related orphan receptor beta                                                                   | Rorb          | 161 | 2083  | 16.5 | RNA metabolism-transcription  |
| 1456487_at   | adenylate cyclase 1                                                                                | Adcy1#        | 162 | 26    | 4.5  | signal transduction           |
| 1456698_s_at | heterogeneous nuclear ribonucleoprotein D-like                                                     | Hnrpdl        | 163 | 297   | 8.5  | RNA metabolism-transcription  |
| 1456844_at   | calcium/calmodulin-dependent protein kinase II, delta                                              | Camk2d        | 164 | 1340  | 4.5  | cell proliferation-cell cycle |
| 1457983_s_at | RWD domain containing 4A                                                                           | Rwdd4a        | 165 | 609   | 16.5 | protein metabolism            |
| 1458174_at   | coiled-coil domain containing 52                                                                   | Ccdc52        | 166 | 11802 | 12.5 |                               |
| 1458506_at   | gene model 1582, (NCBI)                                                                            | Gm1582        | 167 | 238   | 16.5 |                               |
| 1459054_at   | cDNA sequence BC035954                                                                             | BC035954      | 168 | 412   | 16.5 |                               |
| 1457276_at   | SNF1-like kinase 2                                                                                 | Snf1lk2       | 169 | 887   | 20.5 | signal transduction           |
| 1455140_at   | PITPNM family member 3                                                                             | Pitpnm3       | 170 | 27    | 20.5 | transport                     |
| 1452814_at   | copine III                                                                                         | Cpne3         | 171 | 5164  | 0.5  | transport                     |
| 1452807_s_at | RIKEN cDNA 1500016O10 gene                                                                         | 1500016O10Rik | 172 | 2048  | 0.5  |                               |
| 1441727_s_at | zinc finger protein 467                                                                            | Zfp467        | 173 | 894   | 12.5 | RNA metabolism-transcription  |
| 1440605_at   | fascin homolog 2, actin-bundling protein, retinal (Strongylocentrotus purpuratus)                  | Fscn2         | 174 | 200   | 4.5  | development                   |
| 1439862_at   | Visual cortex cDNA, RIKEN full-length enriched library, clone:K530032J01 product:unclassifiable, f | ---           | 175 | 28    | 20.5 |                               |
| 1437759_at   | Phosphofructokinase, platelet                                                                      | Pfklp         | 176 | 6846  | 16.5 | metabolism                    |
| 1436918_at   | dual-specificity tyrosine-(Y)-phosphorylation regulated kinase 2                                   | Dyrk2         | 177 | 708   | 8.5  | protein metabolism            |
| 1435440_at   | PDZ domain containing 8                                                                            | Pdzd8         | 178 | 92    | 12.5 | signal transduction           |
| 1433996_at   | suppressor of variegation 3-9 homolog 2 (Drosophila)                                               | Suv39h2       | 179 | 10291 | 16.5 | cell proliferation-cell cycle |
| 1433812_at   | Lix1-like                                                                                          | Lix1l         | 180 | 3144  | 20.5 |                               |
| 1460741_x_at | DNA segment, Chr 17, Wayne State University 92, expressed                                          | D17Wsu92e     | 181 | 10086 | 20.5 |                               |
| 1460302_at   | thrombospondin 1                                                                                   | Thbs1         | 182 | 570   | 20.5 | cell adhesion                 |
| 1455725_a_at | H3 histone, family 3B                                                                              | H3f3b         | 183 | 77    | 8.5  | DNA metabolism                |
| 1451478_at   | angiotensin-like 7                                                                                 | Angptl7       | 184 | 134   | 12.5 | stress response               |
| 1451370_at   | hypothetical protein LOC622403                                                                     | LOC622403     | 185 | 11924 | 20.5 |                               |
| 1451110_at   | EGL nine homolog 1 (C. elegans)                                                                    | Egln1         | 186 | 1608  | 16.5 | protein metabolism            |
| 1450706_a_at | ADP-ribosylation factor-like 3                                                                     | Arl3          | 187 | 41    | 4.5  | signal transduction           |
| 1450376_at   | Max interacting protein 1                                                                          | Mxi1          | 188 | 194   | 16.5 | RNA metabolism-transcription  |
| 1450193_at   | hyperpolarization-activated, cyclic nucleotide-gated K+ 1                                          | Hcn1          | 189 | 127   | 8.5  | transport                     |
| 1449852_a_at | EH-domain containing 4                                                                             | Ehd4          | 190 | 7912  | 8.5  |                               |
| 1448883_at   | legumain                                                                                           | Lgmn          | 191 | 26469 | 16.5 | protein metabolism            |
| 1448864_at   | SNF related kinase                                                                                 | Snrk          | 192 | 1956  | 16.5 | death                         |
| 1448729_a_at | septin 4                                                                                           | Sep4          | 193 | 14601 | 20.5 | cell proliferation-cell cycle |
| 1448383_at   | matrix metalloproteinase 14 (membrane-inserted)                                                    | Mmp14#        | 194 | 29    | 0.5  | protein metabolism            |
| 1438578_a_at | BTB (POZ) domain containing 10                                                                     | Btdb10        | 195 | 738   | 20.5 | transport                     |
| 1437671_x_at | protease, serine, 23                                                                               | Prss23        | 196 | 1236  | 0.5  | protein metabolism            |
| 1437313_x_at | high mobility group box 2                                                                          | Hmgb2         | 197 | 268   | 4.5  | DNA metabolism                |
| 1435865_at   | histone cluster 3, H2a                                                                             | Hist3h2a      | 198 | 525   | 16.5 | DNA metabolism                |
| 1434410_at   | cDNA sequence BC043118                                                                             | BC043118      | 199 | 1131  | 4.5  |                               |
| 1432431_s_at | RIKEN cDNA 2900006F19 gene                                                                         | 2900006F19Rik | 200 | 27452 | 20.5 |                               |
| 1427074_at   | protein-L-isospartate (D-aspartate) O-methyltransferase domain containing 2                        | Pcmt2d        | 201 | 30    | 12.5 | protein metabolism            |
| 1426311_s_at | zinc finger, DHHC domain containing 5                                                              | Zdhhc5#       | 202 | 107   | 16.5 |                               |
| 1426195_a_at | cystatin C                                                                                         | Cst3          | 203 | 1436  | 4.5  |                               |
| 1425441_at   | ---                                                                                                | ---           | 204 | 82    | 8.5  |                               |
| 1425241_a_at | WD repeat and SOCS box-containing 1                                                                | Wsb1          | 205 | 10288 | 0.5  | signal transduction           |
| 1425138_at   | guanylate cyclase activator 1B                                                                     | Guca1b        | 206 | 31    | 4.5  | cell-cell signaling           |
| 1424312_at   | adiponectin receptor 1                                                                             | Adipor1       | 207 | 1127  | 16.5 | signal transduction           |
| 1424096_at   | keratin 5                                                                                          | Krt5          | 208 | 1994  | 4.5  | development                   |
| 1423785_at   | EGL nine homolog 1 (C. elegans)                                                                    | Egln1         | 209 | 2897  | 16.5 | protein metabolism            |
| 1423686_a_at | proline rich 13                                                                                    | Prr13         | 210 | 5475  | 20.5 |                               |
| 1423489_at   | monocyte to macrophage differentiation-associated                                                  | Mmd           | 211 | 9366  | 16.5 | death                         |
| 1423145_a_at | titin-cap                                                                                          | Tcap#         | 212 | 171   | 12.5 | development                   |
| 1421095_a_at | transient receptor potential cation channel, subfamily C, member 1                                 | Trpc1         | 213 | 143   | 12.5 | transport                     |
| 1421084_at   | retinoschisis (X-linked, juvenile) 1 (human)                                                       | Rs1           | 214 | 270   | 12.5 | cell adhesion                 |
| 1420376_a_at | H3 histone, family 3B                                                                              | H3f3b         | 215 | 63    | 8.5  | DNA metabolism                |

|               |                                                                         |               |     |       |      |                                  |                                  |
|---------------|-------------------------------------------------------------------------|---------------|-----|-------|------|----------------------------------|----------------------------------|
| 1419273_at    | expressed sequence C80913                                               | C80913        | 216 | 189   | 4.5  | protein metabolism               | metabolism                       |
| 1419085_at    | Purkinje cell protein 2 (L7)                                            | Pcp2          | 217 | 25938 | 20.5 | signal transduction              |                                  |
| 1419077_at    | membrane protein, palmitoylated 3 (MAGUK p55 subfamily member 3)        | Mpp3          | 218 | 733   | 4.5  | signal transduction              |                                  |
| 1419070_at    | cystin 1                                                                | Cys1##        | 219 | 71    | 16.5 |                                  |                                  |
| 1417860_a_at  | spondin 2, extracellular matrix protein                                 | Spon2         | 220 | 218   | 0.5  | cell adhesion                    | development                      |
| 1417324_at    | microtubule associated serine/threonine kinase 2                        | Mast2         | 221 | 186   | 4.5  | development                      | signal transduction              |
| 1415718_at    | SAP30-like                                                              | Sap30l        | 222 | 29739 | 0.5  | transport                        | cell organization and biogenesis |
| AFFX-GapdhM   | similar to glyceraldehyde-3-phosphate dehydrogenase                     | Gapd          | 223 | 794   | 20.5 |                                  | metabolism                       |
| AFFX-b-ActinM | actin, beta, cytoplasmic                                                | Actb          | 224 | 32    | 4.5  |                                  |                                  |
| 1457270_at    | RIKEN cDNA B230343A10 gene                                              | B230343A10Rik | 225 | 6076  | 20.5 |                                  |                                  |
| 1457254_x_at  | RIKEN cDNA 6330442E10 gene                                              | 6330442E10Rik | 226 | 223   | 0.5  |                                  |                                  |
| 1455537_at    | RIKEN cDNA 6430547I21 gene                                              | 6430547I21Rik | 227 | 129   | 20.5 |                                  |                                  |
| 1453008_at    | RIKEN cDNA 2300002D11 gene                                              | 2300002D11Rik | 228 | 30900 | 20.5 |                                  |                                  |
| 1446252_at    | Ceramide kinase-like                                                    | Cerkl         | 229 | 3502  | 4.5  |                                  |                                  |
| 1443680_at    | Otx2 opposite strand transcript 1                                       | Otx2os1       | 230 | 428   | 4.5  |                                  |                                  |
| 1440849_at    | RIKEN cDNA 6330417G04 gene                                              | 6330417G04Rik | 231 | 3975  | 4.5  |                                  |                                  |
| 1420199_at    | Solute carrier family 35, member A4                                     | Slc35a4       | 232 | 32389 | 8.5  | transport                        |                                  |
| 1460605_at    | Crx opposite strand transcript 1                                        | Crxos1        | 233 | 2781  | 20.5 | RNA metabolism-transcription     | metabolism                       |
| 1460208_at    | fibrillin 1                                                             | Fbn1          | 234 | 520   | 20.5 | metabolism                       |                                  |
| 1454620_x_at  | ribosomal protein S6                                                    | Rps6          | 235 | 9515  | 8.5  | cell organization and biogenesis | protein metabolism               |
| 1451826_at    | calcium binding protein 5                                               | Cabp5         | 236 | 4644  | 16.5 | signal transduction              |                                  |
| 1451722_s_at  | SET and MYND domain containing 5                                        | Smyd5         | 237 | 27145 | 8.5  |                                  |                                  |
| 1450659_at    | regulator of G protein signaling 7                                      | Rgs7          | 238 | 7893  | 8.5  | signal transduction              |                                  |
| 1448956_at    | START domain containing 10                                              | Stard10       | 239 | 10764 | 20.5 |                                  |                                  |
| 1447820_x_at  | carnitine palmitoyltransferase 2                                        | Cpt2          | 240 | 32111 | 20.5 | transport                        | metabolism                       |
| 1438761_a_at  | ornithine decarboxylase, structural 1                                   | Odc1          | 241 | 69    | 4.5  | cell proliferation-cell cycle    | development                      |
| 1438343_at    | RIKEN cDNA 0610037L13 gene                                              | 0610037L13Rik | 242 | 14437 | 16.5 |                                  |                                  |
| 1438156_x_at  | carnitine palmitoyltransferase 1a, liver                                | Cpt1a         | 243 | 2556  | 4.5  | transport                        | metabolism                       |
| 1434437_x_at  | ribonucleotide reductase M2                                             | Rrm2          | 244 | 4442  | 20.5 | DNA metabolism                   | metabolism                       |
| 1434034_at    | ceramide kinase                                                         | Cerk          | 245 | 174   | 20.5 | signal transduction              | metabolism                       |
| 1431421_x_at  | RIKEN cDNA 2610524G07 gene                                              | 2610524G07Rik | 246 | 24087 | 16.5 |                                  |                                  |
| 1428196_a_at  | RIKEN cDNA 1200015F23 gene                                              | 1200015F23Rik | 247 | 8011  | 16.5 |                                  |                                  |
| 1427612_at    | defensin beta 9                                                         | Defb9         | 248 | 160   | 8.5  |                                  |                                  |
| 1426785_s_at  | monoglyceride lipase                                                    | Mgl#          | 249 | 135   | 20.5 | stress response                  | protein metabolism               |
| 1426464_at    | nuclear receptor subfamily 1, group D, member 1                         | Nr1d1#_##     | 250 | 120   | 4.5  | RNA metabolism-transcription     | metabolism                       |
| 1424750_at    | zinc finger and BTB domain containing 1                                 | Zbtb1         | 251 | 8239  | 20.5 | RNA metabolism-transcription     | metabolism                       |
| 1423690_s_at  | G-protein signalling modulator 1 (AGS3-like, C. elegans)                | Gpsm1         | 252 | 26929 | 0.5  | development                      | signal transduction              |
| 1417162_at    | transmembrane BAX inhibitor motif containing 1                          | Tmbim1        | 253 | 4294  | 20.5 |                                  |                                  |
| 1416632_at    | malic enzyme, supernatant                                               | Mod1          | 254 | 316   | 8.5  | metabolism                       |                                  |
| 1415986_at    | chloride channel 4-2                                                    | Clcn4-2##     | 255 | 3288  | 20.5 | transport                        |                                  |
| 1415806_at    | plasminogen activator, tissue                                           | Plat          | 256 | 381   | 4.5  | stress response                  | signal transduction              |
| AFFX-GapdhM   | similar to glyceraldehyde-3-phosphate dehydrogenase                     | Gapd          | 257 | 374   | 20.5 | M32599_3_at                      | metabolism                       |
| 1460577_at    | Expressed sequence AA591059                                             | AA591059      | 258 | 6411  | 16.5 |                                  |                                  |
| 1459522_s_at  | glycogenin                                                              | Gyg           | 259 | 6768  | 0.5  | metabolism                       |                                  |
| 1458385_at    | heat shock protein 4 like                                               | Hspa4l        | 260 | 12370 | 20.5 | stress response                  | protein metabolism               |
| 1440130_at    | expressed sequence BB116930                                             | BB116930      | 261 | 6827  | 16.5 |                                  |                                  |
| 1437467_at    | activated leukocyte cell adhesion molecule                              | Alcam         | 262 | 12568 | 20.5 | cell adhesion                    | development                      |
| 1435453_at    | RIKEN cDNA A930011O12 gene                                              | A930011O12Rik | 263 | 33    | 16.5 |                                  |                                  |
| 1435319_at    | inositol hexaphosphate kinase 2                                         | Ihpk2         | 264 | 103   | 12.5 | death                            | development                      |
| 1433817_at    | 1-acylglycerol-3-phosphate O-acyltransferase 3                          | Agpat3        | 265 | 479   | 20.5 | metabolism                       |                                  |
| 1460240_a_at  | heterogeneous nuclear ribonucleoprotein C                               | Hnrpc         | 266 | 5343  | 16.5 | RNA metabolism-transcription     | metabolism                       |
| 1453836_a_at  | monoglyceride lipase                                                    | Mgl#          | 267 | 460   | 20.5 | stress response                  | protein metabolism               |
| 1453199_at    | acyl-Coenzyme A binding domain containing 6                             | Acbd6         | 268 | 22555 | 16.5 |                                  |                                  |
| 1452653_at    | solute carrier family 25 (mitochondrial carrier, glutamate), member 22  | Slc25a22      | 269 | 15437 | 16.5 | transport                        |                                  |
| 1451224_at    | secretory carrier membrane protein 5                                    | Scamp5        | 270 | 11891 | 12.5 | transport                        |                                  |
| 1450571_a_at  | beaded filament structural protein in lens-CP94                         | Bfsp1         | 271 | 503   | 0.5  | RNA metabolism-transcription     | metabolism                       |
| 1439148_a_at  | phosphofructokinase, liver, B-type                                      | Pfkl          | 272 | 1049  | 16.5 | metabolism                       |                                  |
| 1437302_at    | adrenergic receptor, beta 2                                             | Adrb2         | 273 | 248   | 16.5 | RNA metabolism-transcription     | stress response                  |
| 1433444_at    | 3-hydroxy-3-methylglutaryl-Coenzyme A synthase 1                        | Hmgcs1        | 274 | 70    | 4.5  | metabolism                       |                                  |
| 1426941_at    | ---                                                                     | ---           | 275 | 790   | 4.5  |                                  |                                  |
| 1425100_a_at  | phosphodiesterase 6G, cGMP-specific, rod, gamma                         | Pde6g         | 276 | 84    | 0.5  | signal transduction              |                                  |
| 1423933_a_at  | RIKEN cDNA 1600029D21 gene                                              | 1600029D21Rik | 277 | 60    | 20.5 |                                  |                                  |
| 1423418_at    | farnesyl diphosphate synthetase                                         | Fdps          | 278 | 1187  | 4.5  | metabolism                       |                                  |
| 1423150_at    | secretogranin V                                                         | Scg5          | 279 | 4715  | 20.5 | cell-cell signaling              | transport                        |
| 1423078_a_at  | sterol-C4-methyl oxidase-like                                           | Sc4mol        | 280 | 156   | 4.5  | metabolism                       |                                  |
| 1422660_at    | similar to Putative RNA-binding protein 3 (RNA-binding motif protein 3) | LOC671237     | 281 | 34    | 12.5 | RNA metabolism-transcription     | stress response                  |
| 1420484_a_at  | vitronectin                                                             | Vtn           | 282 | 577   | 8.5  | cell adhesion                    |                                  |
| 1419945_s_at  | RAB2, member RAS oncogene family                                        | Rab2          | 283 | 1681  | 4.5  | RNA metabolism-transcription     | transport                        |
| 1419706_a_at  | A kinase (PRKA) anchor protein (gravin) 12                              | Akap12        | 284 | 486   | 0.5  | transport                        | signal transduction              |
| 1417542_at    | ribosomal protein S6 kinase, polypeptide 2                              | Rps6ka2       | 285 | 28705 | 8.5  | cell proliferation-cell cycle    | development                      |
| 1417457_at    | CDC28 protein kinase regulatory subunit 2                               | Cks2          | 286 | 72    | 0.5  | cell proliferation-cell cycle    | signal transduction              |
| 1417169_at    | ubiquitin specific peptidase 2                                          | Usp2          | 287 | 201   | 12.5 | protein metabolism               | metabolism                       |
| 1417108_at    | kinesin light chain 4                                                   | Klc4          | 288 | 3820  | 0.5  |                                  |                                  |
| 1416713_at    | RIKEN cDNA 2700055K07 gene                                              | 2700055K07Rik | 289 | 8008  | 16.5 |                                  |                                  |
| 1441065_at    | ---                                                                     | ---           | 290 | 20226 | 8.5  |                                  |                                  |
| 1440131_at    | Poliovirus receptor-related 1                                           | Pvr1          | 291 | 2464  | 0.5  | cell adhesion                    |                                  |
| 1437989_at    | phosphodiesterase 8B                                                    | Pde8b         | 292 | 90    | 20.5 | RNA metabolism-transcription     | signal transduction              |
| 1436294_at    | ankyrin repeat domain 29                                                | Ankrd29       | 293 | 31349 | 20.5 |                                  |                                  |
| 1433592_at    | calmodulin 1                                                            | Calm1         | 294 | 4288  | 20.5 | cell proliferation-cell cycle    | signal transduction              |
| 1428637_at    | dual-specificity tyrosine-(Y)-phosphorylation regulated kinase 2        | Dyrk2         | 295 | 473   | 8.5  | protein metabolism               | metabolism                       |
| 1460409_at    | carnitine palmitoyltransferase 1a, liver                                | Cpt1a         | 296 | 290   | 4.5  | transport                        | metabolism                       |
| 1453287_at    | RIKEN cDNA 5730557B15 gene                                              | 5730557B15Rik | 297 | 173   | 4.5  |                                  |                                  |
| 1452534_a_at  | high mobility group box 2                                               | Hmgb2         | 298 | 126   | 4.5  | DNA metabolism                   | RNA metabolism-transcription     |
| 1452284_at    | protein tyrosine phosphatase, receptor type Z, polypeptide 1            | Ptprz1        | 299 | 595   | 16.5 | development                      | signal transduction              |
| 1451549_at    | cDNA sequence BC016201                                                  | BC016201      | 300 | 18736 | 4.5  |                                  |                                  |
| 1451285_at    | fusion, derived from t(12;16) malignant liposarcoma (human)             | Fus           | 301 | 68    | 8.5  | RNA metabolism-transcription     | metabolism                       |
| 1450970_at    | glutamate oxaloacetate transaminase 1, soluble                          | Got1          | 302 | 29809 | 16.5 | metabolism                       |                                  |
| 1450690_at    | ---                                                                     | ---           | 303 | 2218  | 4.5  |                                  |                                  |
| 1450184_s_at  | thyrotroph embryonic factor                                             | Tef           | 304 | 874   | 8.5  | RNA metabolism-transcription     | metabolism                       |
| 1449159_at    | guanine nucleotide binding protein, beta 3                              | Gnb3          | 305 | 1398  | 20.5 | signal transduction              |                                  |
| 1437981_x_at  | RIKEN cDNA 1110057K04 gene                                              | 1110057K04Rik | 306 | 1949  | 12.5 | metabolism                       |                                  |
| 1434449_at    | aquaporin 4                                                             | Aqp4          | 307 | 12136 | 20.5 | transport                        | development                      |
| 1434150_a_at  | methyltransferase like 7A                                               | Mettl7a#      | 308 | 35    | 12.5 |                                  |                                  |
| 1433668_at    | proline-rich nuclear receptor coactivator 1                             | Pnrc1         | 309 | 25387 | 0.5  |                                  |                                  |
| 1428942_at    | metallothionein 2                                                       | Mt2           | 310 | 2053  | 4.5  | signal transduction              |                                  |
| 1428029_a_at  | H2A histone family, member V                                            | H2afv         | 311 | 9560  | 20.5 | DNA metabolism                   | cell organization and biogenesis |
| 1425171_at    | rhodopsin                                                               | Rho           | 312 | 27843 | 0.5  | signal transduction              | protein metabolism               |
| 1422094_a_at  | zinc finger protein 329                                                 | Zfp329        | 313 | 7124  | 0.5  |                                  |                                  |
| 1418304_at    | protocadherin 21                                                        | Pcdh21        | 314 | 541   | 20.5 | cell adhesion                    |                                  |
| 1418083_at    | RIKEN cDNA 0610009B22 gene                                              | 0610009B22Rik | 315 | 407   | 8.5  | RNA metabolism-transcription     | transport                        |
| AFFX-b-ActinM | actin, beta, cytoplasmic                                                | Actb          | 316 | 1112  | 4.5  | M12481_M_at                      |                                  |
| 1452933_at    | ankyrin repeat domain 39                                                | Ankrd39       | 317 | 20275 | 0.5  |                                  |                                  |
| 1439093_at    | ---                                                                     | ---           | 318 | 1041  | 20.5 |                                  |                                  |
| 1434602_at    | thyroid hormone receptor associated protein 2                           | Thrap2        | 319 | 285   | 4.5  | RNA metabolism-transcription     | metabolism                       |
| 1460341_at    | pleckstrin homology domain containing, family B (evectins) member 2     | Plekhh2       | 320 | 1376  | 20.5 |                                  |                                  |
| 1451529_at    | small glutamine-rich tetratricopeptide repeat (TPR)-containing, beta    | Sgtb          | 321 | 3842  | 16.5 |                                  |                                  |
| 1450770_at    | RIKEN cDNA 3632451O06 gene                                              | 3632451O06Rik | 322 | 7324  | 20.5 |                                  |                                  |
| 1450269_a_at  | phosphofructokinase, liver, B-type                                      | Pfkl          | 323 | 2904  | 16.5 | metabolism                       |                                  |

|              |                                                                                                           |               |     |       |      |                               |                                  |
|--------------|-----------------------------------------------------------------------------------------------------------|---------------|-----|-------|------|-------------------------------|----------------------------------|
| 1449628_s_at | START domain containing 7                                                                                 | Stard7        | 324 | 224   | 8.5  |                               |                                  |
| 1448276_at   | tetraspanin 4                                                                                             | Tspan4        | 325 | 146   | 12.5 | protein metabolism            | metabolism                       |
| 1437463_x_at | transforming growth factor, beta induced                                                                  | Tgfb          | 326 | 12018 | 20.5 | cell adhesion                 | cell proliferation-cell cycle    |
| 1435639_at   | RIKEN cDNA 2610528A11 gene                                                                                | 2610528A11Rik | 327 | 8594  | 0.5  |                               |                                  |
| 1434487_at   | myocyte enhancer factor 2D                                                                                | Mef2d         | 328 | 155   | 16.5 | RNA metabolism-transcription  | development                      |
| 1433991_x_at | diazepam binding inhibitor                                                                                | Dbi           | 329 | 22986 | 0.5  | transport                     |                                  |
| 1431057_a_at | protease, serine, 23                                                                                      | Prss23        | 330 | 364   | 0.5  | protein metabolism            | metabolism                       |
| 1427872_at   | platelet-activating factor receptor                                                                       | Ptavr         | 331 | 4250  | 12.5 | stress response               | signal transduction              |
| 1427404_x_at | similar to enolase 1, alpha non-neuron                                                                    | LOC433182     | 332 | 22160 | 16.5 | metabolism                    |                                  |
| 1425983_x_at | homeodomain interacting protein kinase 2                                                                  | Hipk2         | 333 | 13708 | 20.5 | cell proliferation-cell cycle | death                            |
| 1422600_at   | RAS protein-specific guanine nucleotide-releasing factor 1                                                | Rasgrf1       | 334 | 17793 | 0.5  | cell-cell signaling           | cell proliferation-cell cycle    |
| 1422053_at   | inhibin beta-A                                                                                            | Inhba         | 335 | 2466  | 4.5  | cell-cell signaling           | cell proliferation-cell cycle    |
| 1420093_s_at | heterogeneous nuclear ribonucleoprotein D-like                                                            | Hnrpdl        | 336 | 109   | 8.5  | RNA metabolism-transcription  | metabolism                       |
| 1419022_a_at | enolase 1, alpha non-neuron                                                                               | Eno1          | 337 | 19501 | 20.5 | metabolism                    |                                  |
| 1456742_x_at | transmembrane 9 superfamily member 2                                                                      | Tm9sf2        | 338 | 20661 | 8.5  | transport                     |                                  |
| 1455460_at   | RIKEN cDNA 6430547121 gene                                                                                | 6430547121Rik | 339 | 332   | 20.5 |                               |                                  |
| 1455247_at   | angiotensin-like 1                                                                                        | Amotl1        | 340 | 1859  | 0.5  |                               |                                  |
| 1447870_x_at | RIKEN cDNA 1110002E22 gene                                                                                | 1110002E22Rik | 341 | 31437 | 20.5 |                               |                                  |
| 1435645_at   | monocyte to macrophage differentiation-associated                                                         | Mmd           | 342 | 7409  | 20.5 | death                         |                                  |
| 1428763_at   | single-strand selective monofunctional uracil DNA glycosylase                                             | Smug1         | 343 | 167   | 20.5 | DNA metabolism                | stress response                  |
| 1460203_at   | inositol 1,4,5-triphosphate receptor 1                                                                    | Itpr1         | 344 | 28484 | 16.5 | transport                     | signal transduction              |
| 1454694_a_at | topoisomerase (DNA) II alpha                                                                              | Top2a         | 345 | 1068  | 20.5 | DNA metabolism                | RNA metabolism-transcription     |
| 1448904_at   | DNA segment, Chr 6, Wayne State University 176, expressed                                                 | D6Wsu176e     | 346 | 170   | 4.5  |                               |                                  |
| 1448100_at   | RIKEN cDNA 4833439L19 gene                                                                                | 4833439L19Rik | 347 | 1566  | 20.5 |                               |                                  |
| 1438058_s_at | prostate tumor over expressed gene 1                                                                      | Ptov1         | 348 | 27088 | 20.5 | RNA metabolism-transcription  | protein metabolism               |
| 1437724_x_at | phosphatidylinositol membrane-associated 1                                                                | Pitpnm1       | 349 | 9966  | 0.5  | transport                     |                                  |
| 1436722_a_at | actin, beta, cytoplasmic                                                                                  | Actb          | 350 | 278   | 4.5  |                               |                                  |
| 1427195_at   | Mus musculus, clone IMAGE:3983419, mRNA                                                                   | ---           | 351 | 9632  | 16.5 |                               |                                  |
| 1425760_a_at | phosphatidylinositol membrane-associated 1                                                                | Pitpnm1       | 352 | 14436 | 0.5  | transport                     |                                  |
| 1423211_at   | nucleolar protein family A, member 3                                                                      | Nola3         | 353 | 389   | 16.5 | RNA metabolism-transcription  | cell organization and biogenesis |
| 1416468_at   | aldehyde dehydrogenase family 1, subfamily A1                                                             | Aldh1a1       | 354 | 203   | 20.5 | death                         | development                      |
| 1456909_at   | similar to Glucose-6-phosphate isomerase (GPI) (Phosphoglucose isomerase) (PGI) (Phosphohexose isomerase) | LOC676974     | 355 | 2414  | 16.5 |                               |                                  |
| 1447496_s_at | fibronectin type 3 and ankyrin repeat domains 1                                                           | Fank1         | 356 | 28559 | 12.5 | RNA metabolism-transcription  | metabolism                       |
| 1428889_at   | alkB, alkylation repair homolog 3 (E. coli)                                                               | Alkbh3        | 357 | 239   | 8.5  |                               |                                  |
| 1428799_at   | RIKEN cDNA 4930431B11 gene                                                                                | 4930431B11Rik | 358 | 6897  | 8.5  |                               |                                  |
| 1453412_a_at | SEC14-like 1 (S. cerevisiae)                                                                              | Sec14l1       | 359 | 596   | 16.5 | transport                     |                                  |
| 1450391_a_at | monoglyceride lipase                                                                                      | Mgl1          | 360 | 56    | 20.5 | stress response               | protein metabolism               |
| 1449379_at   | kinase insert domain protein receptor                                                                     | Kdr           | 361 | 855   | 0.5  | development                   | signal transduction              |
| 1448213_at   | annexin A1                                                                                                | Anxa1         | 362 | 574   | 12.5 | cell proliferation-cell cycle | signal transduction              |
| 1448026_at   | ---                                                                                                       | ---           | 363 | 1538  | 16.5 |                               |                                  |
| 1438654_x_at | monocyte to macrophage differentiation-associated 2                                                       | Mmd2          | 364 | 11993 | 16.5 | death                         |                                  |
| 1435390_at   | exonuclease domain containing 1                                                                           | Exod1         | 365 | 17658 | 0.5  |                               |                                  |
| 1431420_s_at | RIKEN cDNA 2610524G07 gene                                                                                | 2610524G07Rik | 366 | 29257 | 16.5 |                               |                                  |
| 1428071_at   | RIKEN cDNA 1110038D17 gene                                                                                | 1110038D17Rik | 367 | 5857  | 20.5 |                               |                                  |
| 1425665_a_at | signal recognition particle 54                                                                            | Srp54         | 368 | 16879 | 20.5 | transport                     | cell organization and biogenesis |
| 1423804_a_at | isopentenyl-diphosphate delta isomerase                                                                   | Idi1          | 369 | 208   | 4.5  | metabolism                    |                                  |
| 1421493_a_at | regulator of G-protein signaling 20                                                                       | Rgs20         | 370 | 303   | 4.5  | signal transduction           |                                  |
| 1419084_a_at | Purkinje cell protein 2 (L7)                                                                              | Pcp2          | 371 | 20829 | 0.5  | signal transduction           |                                  |
| 1417386_at   | aminopeptidase puromycin sensitive                                                                        | Nppeps        | 372 | 1423  | 20.5 | protein metabolism            | metabolism                       |
| 1457703_at   | expressed sequence BE686333                                                                               | BE686333      | 373 | 10266 | 20.5 |                               |                                  |
| 1453587_at   | gamma-glutamyltransferase 6                                                                               | Ggt6          | 374 | 29960 | 12.5 |                               |                                  |
| 1445024_at   | START domain containing 7                                                                                 | Stard7        | 375 | 2056  | 4.5  |                               |                                  |
| 1435188_at   | gene model 129, (NCBI)                                                                                    | Gm129         | 376 | 1383  | 8.5  |                               |                                  |
| 1434758_at   | cysteine-rich secretory protein LCCL domain containing 2                                                  | Crispld2      | 377 | 1384  | 4.5  |                               |                                  |
| 1433727_at   | cDNA sequence BC038479                                                                                    | BC038479      | 378 | 3093  | 8.5  | metabolism                    |                                  |
| 1430614_at   | RIKEN cDNA 4632415K11 gene                                                                                | 4632415K11Rik | 379 | 4919  | 20.5 |                               |                                  |
| 1460707_at   | protein tyrosine phosphatase 4a2                                                                          | Ptp4a2        | 380 | 26145 | 4.5  | protein metabolism            | metabolism                       |
| 1455106_a_at | creatine kinase, brain                                                                                    | Ckb           | 381 | 705   | 4.5  |                               |                                  |
| 1448659_at   | caspase 7                                                                                                 | Casp7         | 382 | 2012  | 4.5  | death                         | development                      |
| 1448529_at   | thrombomodulin                                                                                            | Thbd          | 383 | 6244  | 20.5 | stress response               | development                      |
| 1424034_at   | RAR-related orphan receptor alpha                                                                         | Rora          | 384 | 26263 | 20.5 | RNA metabolism-transcription  | signal transduction              |
| 1423729_a_at | RIKEN cDNA 2500002L14 gene                                                                                | 2500002L14Rik | 385 | 25888 | 20.5 |                               |                                  |
| 1423656_x_at | RIKEN cDNA 1500010J02 gene                                                                                | 1500010J02Rik | 386 | 21211 | 0.5  |                               |                                  |
| 1421698_a_at | procollagen, type XIX, alpha 1                                                                            | Col19a1       | 387 | 1078  | 8.5  | cell adhesion                 | transport                        |
| 1421346_a_at | solute carrier family 6 (neurotransmitter transporter, taurine), member 6                                 | Slc6a6        | 388 | 2796  | 16.5 | transport                     |                                  |
| 1418694_at   | potassium channel modulatory factor 1                                                                     | Kcmf1         | 389 | 29043 | 20.5 | protein metabolism            | metabolism                       |
| 1417455_at   | transforming growth factor, beta 3                                                                        | Tgfb3         | 390 | 2613  | 20.5 | cell-cell signaling           | cell proliferation-cell cycle    |
| 1416251_at   | minichromosome maintenance deficient 6 (MIS5 homolog, S. pombe) (S. cerevisiae)                           | Mcm6          | 391 | 2294  | 16.5 | cell proliferation-cell cycle | DNA metabolism                   |
| 1454819_at   | ---                                                                                                       | ---           | 392 | 294   | 16.5 |                               |                                  |
| 1454254_s_at | RIKEN cDNA 1600029D21 gene                                                                                | 1600029D21Rik | 393 | 850   | 20.5 |                               |                                  |
| 1452970_at   | zinc finger, MYM-type 2                                                                                   | Zmym2         | 394 | 20435 | 16.5 | RNA metabolism-transcription  | metabolism                       |
| 1447830_s_at | regulator of G-protein signaling 2                                                                        | Rgs2          | 395 | 16534 | 0.5  | cell proliferation-cell cycle | signal transduction              |
| 1446156_at   | Dystrophin, muscular dystrophy                                                                            | Dmd           | 396 | 19523 | 20.5 | development                   | metabolism                       |
| 1445169_at   | ---                                                                                                       | ---           | 397 | 15066 | 12.5 |                               |                                  |
| 1441259_s_at | intraflagellar transport 122 homolog (Chlamydomonas)                                                      | Ift122        | 398 | 30488 | 16.5 |                               |                                  |
| 1440250_at   | procollagen, type IV, alpha 4                                                                             | Col4a4        | 399 | 8228  | 0.5  | cell adhesion                 | transport                        |
| 1434701_at   | expressed sequence AW215868                                                                               | AW215868      | 400 | 3146  | 16.5 |                               |                                  |
| 1431892_a_at | phospholipase C, delta 3                                                                                  | Plcd3         | 401 | 4083  | 16.5 | development                   | signal transduction              |
| 1429097_at   | RIKEN cDNA C030044C12 gene                                                                                | C030044C12Rik | 402 | 4979  | 20.5 |                               |                                  |
| 1460390_at   | sortilin-related receptor, LDLR class A repeats-containing                                                | Sor1          | 403 | 8424  | 16.5 | transport                     | development                      |
| 1456117_at   | RIKEN cDNA 2600005C20 gene                                                                                | 2600005C20Rik | 404 | 1059  | 4.5  | RNA metabolism-transcription  | cell organization and biogenesis |
| 1451895_a_at | 24-dehydrocholesterol reductase                                                                           | Dhcr24        | 405 | 116   | 4.5  | cell proliferation-cell cycle | death                            |
| 1450848_at   | death associated protein 3                                                                                | Dap3          | 406 | 3061  | 12.5 | death                         |                                  |
| 1450377_at   | similar to thrombospondin 1                                                                               | LOC640441     | 407 | 57    | 20.5 | cell adhesion                 | stress response                  |
| 1436584_at   | sprouty homolog 2 (Drosophila)                                                                            | Spry2         | 408 | 5578  | 16.5 | cell-cell signaling           | development                      |
| 1434661_at   | synaptogyrin 1                                                                                            | Syng1         | 409 | 15493 | 0.5  | transport                     | cell organization and biogenesis |
| 1434500_at   | twety homolog 2 (Drosophila)                                                                              | Ttyh2         | 410 | 6981  | 20.5 |                               |                                  |
| 1426300_at   | activated leukocyte cell adhesion molecule                                                                | Alcam         | 411 | 9461  | 4.5  | cell adhesion                 | development                      |
| 1423192_at   | paraspeckle protein 1                                                                                     | Pspc1         | 412 | 637   | 4.5  | cell adhesion                 |                                  |
| 1419575_s_at | zinc finger protein 292                                                                                   | Zfp292        | 413 | 8255  | 0.5  | stress response               | protein metabolism               |
| 1419483_at   | complement component 3a receptor 1                                                                        | C3ar1         | 414 | 26808 | 12.5 | stress response               | signal transduction              |
| 1458341_x_at | ---                                                                                                       | ---           | 415 | 3079  | 20.5 |                               |                                  |
| 1455970_at   | Phosphodiesterase 5A, cGMP-specific                                                                       | Pde5a         | 416 | 10490 | 0.5  | signal transduction           | metabolism                       |
| 1437056_x_at | cysteine-rich secretory protein LCCL domain containing 2                                                  | Crispld2      | 417 | 4639  | 0.5  |                               |                                  |
| 1435741_at   | phosphodiesterase 8B                                                                                      | Pde8b         | 418 | 102   | 20.5 | RNA metabolism-transcription  | signal transduction              |
| 1435484_at   | expressed sequence BF642829                                                                               | BF642829      | 419 | 7149  | 20.5 |                               |                                  |
| 1433977_at   | heparan sulfate (glucosamine) 3-O-sulfotransferase 3B1                                                    | Hs3st3b1      | 420 | 5212  | 16.5 | protein metabolism            | metabolism                       |
| 1456542_s_at | glutamyl-tRNA synthase (glutamine-hydrolyzing)-like 1                                                     | Qrs1          | 421 | 205   | 4.5  | protein metabolism            | metabolism                       |
| 1454925_x_at | malate dehydrogenase 1, NAD (soluble)                                                                     | Mdh1          | 422 | 12637 | 16.5 | metabolism                    |                                  |
| 1452149_at   | ubiquitin protein ligase E3B                                                                              | Ube3b         | 423 | 15857 | 20.5 | protein metabolism            | metabolism                       |
| 1451617_at   | rhodopsin                                                                                                 | Rho           | 424 | 9583  | 20.5 | signal transduction           | protein metabolism               |
| 1450646_at   | cytochrome P450, family 51                                                                                | Cyp51         | 425 | 3971  | 4.5  | protein metabolism            | metabolism                       |
| 1448370_at   | Unc-51 like kinase 1 (C. elegans)                                                                         | Ulk1          | 426 | 1972  | 16.5 | development                   | signal transduction              |
| 1431591_s_at | hypothetical protein LOC677168                                                                            | LOC677168     | 427 | 16773 | 8.5  | protein metabolism            | metabolism                       |
| 1422784_at   | keratin 6A                                                                                                | Krt6a         | 428 | 5888  | 4.5  | development                   | cell organization and biogenesis |
| 1422208_a_at | guanine nucleotide binding protein, beta 5                                                                | Gnb5          | 429 | 4563  | 16.5 | signal transduction           |                                  |
| 1418300_a_at | MAP kinase-interacting serine/threonine kinase 2                                                          | Mknk2         | 430 | 202   | 16.5 | stress response               | signal transduction              |
| 1454901_at   | yippee-like 2 (Drosophila)                                                                                | Ypel2         | 431 | 15854 | 4.5  |                               |                                  |

|              |                                                                                                  |               |     |       |      |                                                                |
|--------------|--------------------------------------------------------------------------------------------------|---------------|-----|-------|------|----------------------------------------------------------------|
| 1442863_at   | calcium channel, voltage-dependent, alpha 2/delta subunit 4                                      | Ca2a2d4       | 432 | 812   | 20.5 |                                                                |
| 1440074_at   | hypothetical gene supported by AK082832                                                          | LOC432988     | 433 | 8109  | 0.5  |                                                                |
| 1436808_x_at | minichromosome maintenance deficient 5, cell division cycle 46 (S. cerevisiae)                   | Mcm5          | 434 | 1723  | 16.5 | cell proliferation-cell cycle DNA metabolism                   |
| 1429169_at   | RNA binding motif protein 3                                                                      | Rbm3          | 435 | 367   | 16.5 | RNA metabolism-transcription stress response                   |
| 1452158_at   | glutamyl-prolyl-tRNA synthetase                                                                  | Eprs          | 436 | 27111 | 4.5  | RNA metabolism-transcription protein metabolism                |
| 1451633_a_at | guanine nucleotide binding protein (G protein), gamma transducing activity polypeptide 1         | Gngt1         | 437 | 6268  | 12.5 | signal transduction                                            |
| 1450162_at   | D4, zinc and double PHD fingers, family 3                                                        | Dpf3          | 438 | 380   | 4.5  | RNA metabolism-transcription metabolism                        |
| 1438093_x_at | diazepam binding inhibitor                                                                       | Dbi           | 439 | 24732 | 4.5  | transport                                                      |
| 1424699_at   | RIKEN cDNA 4921511K06 gene                                                                       | 4921511K06Rik | 440 | 10516 | 16.5 |                                                                |
| 1422848_a_at | poly(A) binding protein, nuclear 1                                                               | Pabpn1        | 441 | 22952 | 4.5  | RNA metabolism-transcription metabolism                        |
| 1417420_at   | cyclin D1                                                                                        | Ccnd1         | 442 | 185   | 8.5  | cell proliferation-cell cycle stress response                  |
| 1416153_at   | signal recognition particle 54                                                                   | Srp54         | 443 | 13107 | 16.5 | transport cell organization and biogenesis                     |
| 1458107_at   | ---                                                                                              | ---           | 444 | 946   | 8.5  |                                                                |
| 1455143_at   | neurologin 2                                                                                     | Nlgn2         | 445 | 2321  | 20.5 | cell adhesion development                                      |
| 1422230_s_at | cytochrome P450, family 2, subfamily a, polypeptide 4                                            | Cyp2a4##      | 446 | 62    | 12.5 | metabolism                                                     |
| 1418509_at   | carbonyl reductase 2                                                                             | Cbr2          | 447 | 795   | 12.5 | metabolism                                                     |
| 1417458_s_at | CDC28 protein kinase regulatory subunit 2                                                        | Cks2          | 448 | 137   | 0.5  | cell proliferation-cell cycle signal transduction              |
| 1457736_at   | vacuolar protein sorting 37D (yeast)                                                             | Vps37d        | 449 | 25262 | 12.5 |                                                                |
| 1455324_at   | phosphatidylinositol-specific phospholipase C, X domain containing 2                             | Plcxd2        | 450 | 2615  | 20.5 |                                                                |
| 1439128_at   | zinc finger and BTB domain containing 20                                                         | Zbtb20        | 451 | 18510 | 0.5  | RNA metabolism-transcription metabolism                        |
| 1435155_at   | cingulin                                                                                         | Cgn           | 452 | 1985  | 0.5  |                                                                |
| 1429791_at   | RIKEN cDNA A930004D18 gene                                                                       | A930004D18Rik | 453 | 133   | 4.5  |                                                                |
| 1452035_at   | procollagen, type IV, alpha 1                                                                    | Col4a1        | 454 | 836   | 4.5  | cell adhesion transport                                        |
| 1451083_s_at | alanyl-tRNA synthetase                                                                           | Aars          | 455 | 2706  | 4.5  | RNA metabolism-transcription protein metabolism                |
| 1448775_at   | interferon activated gene 203                                                                    | Ifi203        | 456 | 2757  | 4.5  | RNA metabolism-transcription transport                         |
| 1428662_a_at | homeobox only domain                                                                             | Hod           | 457 | 2760  | 4.5  | RNA metabolism-transcription development                       |
| 1423861_at   | pleckstrin homology domain containing, family F (with FYVE domain) member 2                      | Plekfh2       | 458 | 85    | 4.5  |                                                                |
| 1419451_at   | fizzy/cell division cycle 20 related 1 (Drosophila)                                              | Fzr1          | 459 | 32333 | 20.5 | cell proliferation-cell cycle protein metabolism               |
| 1419450_at   | ORM1-like 3 (S. cerevisiae)                                                                      | Ormdl3        | 460 | 21736 | 20.5 |                                                                |
| 1457428_at   | hypothetical protein C230040D14                                                                  | C230040D14    | 461 | 32390 | 20.5 |                                                                |
| 1456413_at   | phosphodiesterase 4D interacting protein (myomegalin)                                            | Pde4dip       | 462 | 2146  | 16.5 |                                                                |
| 1454902_at   | protein kinase C, zeta                                                                           | Prkcz         | 463 | 18609 | 16.5 | death signal transduction                                      |
| 1449218_at   | cytochrome c oxidase, subunit VIIIb                                                              | Cox8b         | 464 | 13386 | 16.5 | metabolism                                                     |
| 1436994_a_at | histone cluster 1, H1c                                                                           | Hist1h1c      | 465 | 415   | 4.5  | DNA metabolism transport                                       |
| 1425530_a_at | syntaxin 3                                                                                       | Stx3          | 466 | 394   | 20.5 | transport cell organization and biogenesis                     |
| 1424646_at   | uridine-cytidine kinase 1-like 1                                                                 | Uck1          | 467 | 287   | 4.5  | metabolism                                                     |
| 1418528_a_at | defender against cell death 1                                                                    | Dad1          | 468 | 23196 | 0.5  | death protein metabolism                                       |
| 1418345_at   | tumor necrosis factor (ligand) superfamily, member 13                                            | Tnfrsf13      | 469 | 399   | 8.5  | cell proliferation-cell cycle DNA metabolism                   |
| 1416728_at   | casein kinase 2, beta polypeptide                                                                | Cskn2b        | 470 | 29946 | 0.5  | signal transduction                                            |
| 1460692_at   | euchromatic histone lysine N-methyltransferase 2                                                 | Ehmt2         | 471 | 5666  | 20.5 | DNA metabolism cell organization and biogenesis                |
| 1455286_at   | BTB (POZ) domain containing 1                                                                    | Btbd1         | 472 | 21029 | 16.5 |                                                                |
| 1451590_at   | complexin 4                                                                                      | Cplx4         | 473 | 354   | 0.5  | cell-cell signaling transport                                  |
| 1449197_at   | WD repeat domain 20a                                                                             | Wdr20a        | 474 | 26561 | 20.5 |                                                                |
| 1448657_a_at | DnaJ (Hsp40) homolog, subfamily B, member 10                                                     | Dnajb10       | 475 | 98    | 20.5 | protein metabolism metabolism                                  |
| 1425682_a_at | Tp53r binding protein                                                                            | Tprkb         | 476 | 24488 | 0.5  |                                                                |
| 1425162_at   | RAR-related orphan receptor beta                                                                 | Rorb          | 477 | 1129  | 20.5 | RNA metabolism-transcription development                       |
| 1423642_at   | tubulin, beta 2c                                                                                 | Tubb2c        | 478 | 20311 | 20.5 | transport cell organization and biogenesis                     |
| 1422752_at   | polymerase (RNA) III (DNA directed) polypeptide K                                                | Poi3k         | 479 | 3071  | 8.5  | RNA metabolism-transcription metabolism                        |
| 1458021_at   | Sorting nexin 15                                                                                 | Snx15         | 480 | 21891 | 12.5 | transport signal transduction                                  |
| 1455066_s_at | RIKEN cDNA 9130229H14 gene                                                                       | 9130229H14Rik | 481 | 22324 | 20.5 |                                                                |
| 1452341_at   | enoyl Coenzyme A hydratase, short chain, 1, mitochondrial                                        | Echs1         | 482 | 13560 | 20.5 | metabolism                                                     |
| 1451570_a_at | RIKEN cDNA 6720467C03 gene                                                                       | 6720467C03Rik | 483 | 11107 | 8.5  |                                                                |
| 1450436_s_at | DnaJ (Hsp40) homolog, subfamily B, member 5                                                      | Dnajb5        | 484 | 13347 | 12.5 | protein metabolism metabolism                                  |
| 1449132_at   | opsin 1 (cone pigments), short-wave-sensitive (color blindness, tritan)                          | Opn1sw        | 485 | 536   | 0.5  | signal transduction protein metabolism                         |
| 1449117_at   | Jun proto-oncogene related gene d1                                                               | Jund1         | 486 | 28302 | 16.5 | cell proliferation-cell cycle RNA metabolism-transcription     |
| 1426708_at   | anthrax toxin receptor 2                                                                         | Antrx2        | 487 | 6325  | 8.5  |                                                                |
| 1426310_at   | zinc finger, DHHC domain containing 5                                                            | Zdhhc5        | 488 | 36    | 20.5 |                                                                |
| 1423893_x_at | amyloid beta (A4) precursor protein-binding, family B, member 1                                  | Apb1b         | 489 | 6905  | 20.5 | cell proliferation-cell cycle RNA metabolism-transcription     |
| 1421812_at   | TAP binding protein                                                                              | Tapbp         | 490 | 30121 | 0.5  | transport cell organization and biogenesis                     |
| 1420655_at   | patatin-like phospholipase domain containing 3                                                   | Pnpla3        | 491 | 209   | 16.5 | metabolism                                                     |
| 1420562_at   | secreted Ly6/Plaur domain containing 1                                                           | Slurp1        | 492 | 229   | 8.5  | cell adhesion                                                  |
| 1457636_x_at | ---                                                                                              | ---           | 493 | 10859 | 16.5 |                                                                |
| 1457010_at   | RIKEN cDNA 3010001F23 gene                                                                       | 3010001F23Rik | 494 | 869   | 20.5 |                                                                |
| 1437974_a_at | hexokinase 1                                                                                     | Hk1           | 495 | 14136 | 16.5 | metabolism                                                     |
| 1428081_at   | kelch-like 21 (Drosophila)                                                                       | Klh21         | 496 | 21081 | 16.5 |                                                                |
| 1426404_a_at | ring finger protein 11                                                                           | Rnf11         | 497 | 19335 | 20.5 | protein metabolism metabolism                                  |
| 1425784_a_at | olfactomedin 1                                                                                   | Olfm1         | 498 | 3994  | 0.5  | development protein metabolism                                 |
| 1425099_a_at | aryl hydrocarbon receptor nuclear translocator-like                                              | Arntl         | 499 | 2134  | 20.5 | RNA metabolism-transcription transport                         |
| 1423636_at   | WD repeat domain 31                                                                              | Wdr31         | 500 | 602   | 20.5 | transport protein metabolism                                   |
| 1421811_at   | thrombospondin 1                                                                                 | Thbs1         | 501 | 265   | 20.5 | cell adhesion stress response                                  |
| 1421780_a_at | calcium binding protein 5                                                                        | Cabp5         | 502 | 28857 | 20.5 | signal transduction                                            |
| 1420056_s_at | phosphatidylserine receptor                                                                      | Ptdsr         | 503 | 9403  | 16.5 | death development                                              |
| 1418615_at   | astrotactin 1                                                                                    | Astn1         | 504 | 13741 | 20.5 | cell adhesion                                                  |
| 1418442_at   | exportin 1, CRM1 homolog (yeast)                                                                 | Xpo1          | 505 | 5817  | 4.5  | transport cell organization and biogenesis                     |
| 1417168_a_at | ubiquitin specific peptidase 2                                                                   | Usp2          | 506 | 172   | 12.5 | protein metabolism metabolism                                  |
| 1457048_at   | G protein-coupled receptor 103                                                                   | Gpr103        | 507 | 20649 | 0.5  | signal transduction                                            |
| 1434430_s_at | adenosine A2b receptor                                                                           | Adora2b       | 508 | 3633  | 16.5 | signal transduction                                            |
| 1433754_at   | muscleblind-like 2                                                                               | Mbnl2         | 509 | 665   | 4.5  |                                                                |
| 1433728_at   | cDNA sequence BC038479                                                                           | BC038479      | 510 | 115   | 8.5  | metabolism                                                     |
| 1455494_at   | procollagen, type I, alpha 1                                                                     | Col1a1        | 511 | 25343 | 8.5  | cell adhesion transport                                        |
| 1454632_at   | RIKEN cDNA 6330442E10 gene                                                                       | 6330442E10Rik | 512 | 507   | 20.5 |                                                                |
| 1453881_x_at | centrin 1                                                                                        | Cetn1         | 513 | 3161  | 4.5  | cell proliferation-cell cycle cell organization and biogenesis |
| 1433543_at   | anillin, actin binding protein (scraps homolog, Drosophila)                                      | Anln          | 514 | 1624  | 0.5  | cell proliferation-cell cycle                                  |
| 1426004_a_at | transglutaminase 2, C polypeptide                                                                | Tgm2          | 515 | 1586  | 0.5  | cell adhesion signal transduction                              |
| 1423101_at   | progesterin and adipoQ receptor family member IV                                                 | Pagr4         | 516 | 787   | 20.5 |                                                                |
| 1422720_at   | ISL1 transcription factor, LIM/homeodomain                                                       | Isl1          | 517 | 25906 | 20.5 | RNA metabolism-transcription development                       |
| 1417794_at   | zinc finger, MYM-type 3                                                                          | Zmym3         | 518 | 12274 | 0.5  |                                                                |
| 1416419_s_at | gamma-aminobutyric acid (GABA(A)) receptor-associated protein-like 1                             | Gabarapl1     | 519 | 4745  | 16.5 |                                                                |
| 1460479_at   | RIKEN cDNA A330094K24 gene                                                                       | A330094K24Rik | 520 | 30726 | 4.5  |                                                                |
| 1455437_at   | cDNA sequence BC033915                                                                           | BC033915      | 521 | 515   | 16.5 | protein metabolism metabolism                                  |
| 1455160_at   | RIKEN cDNA 2610203C20 gene                                                                       | 2610203C20Rik | 522 | 19742 | 0.5  |                                                                |
| 1453011_at   | 3-hydroxybutyrate dehydrogenase, type 2                                                          | Bdh2          | 523 | 16021 | 8.5  | metabolism                                                     |
| 1430985_at   | RIKEN cDNA 1810027O10 gene                                                                       | 1810027O10Rik | 524 | 16374 | 0.5  |                                                                |
| 1428384_at   | DNA segment, Chr 4, Brigham & Women's Genetics 0951 expressed                                    | D4Bwg0951e    | 525 | 21639 | 16.5 |                                                                |
| 1428325_at   | RIKEN cDNA 2610019P18 gene                                                                       | 2610019P18Rik | 526 | 26126 | 20.5 |                                                                |
| 1450688_at   | ral guanine nucleotide dissociation stimulator-like 2                                            | Rgl2          | 527 | 14376 | 0.5  | signal transduction                                            |
| 1438416_at   | thyroid hormone receptor associated protein 5                                                    | Thrap5        | 528 | 10777 | 4.5  | RNA metabolism-transcription signal transduction               |
| 1431226_a_at | fibronectin type III domain containing 4                                                         | Fndc4         | 529 | 656   | 20.5 |                                                                |
| 1425582_a_at | endomucin                                                                                        | Emcn          | 530 | 24493 | 20.5 | cell adhesion development                                      |
| 1416923_a_at | BCL2/adenovirus E1B interacting protein 3-like                                                   | Bnip3l        | 531 | 31121 | 16.5 | death                                                          |
| 1438921_at   | Ataxia telangiectasia and Rad3 related                                                           | Atr           | 532 | 12372 | 0.5  | cell proliferation-cell cycle DNA metabolism                   |
| 1435302_at   | TAF4B RNA polymerase II, TATA box binding protein (TBP)-associated factor                        | Taf4b         | 533 | 929   | 4.5  | RNA metabolism-transcription metabolism                        |
| 1435265_at   | Adult male cecum cDNA, RIKEN full-length enriched library, clone:9130204C03 product:unclassified | ---           | 534 | 4181  | 16.5 |                                                                |
| 1435179_at   | RIKEN cDNA C130071C03 gene                                                                       | C130071C03Rik | 535 | 6453  | 16.5 |                                                                |
| 1449853_at   | sideroflexin 2                                                                                   | Sfxn2         | 536 | 749   | 4.5  | transport                                                      |
| 1439253_x_at | RIKEN cDNA 2610524G07 gene                                                                       | 2610524G07Rik | 537 | 19466 | 16.5 |                                                                |
| 1435627_x_at | MARCKS-like 1 F52                                                                                | Marcks1       | 538 | 620   | 4.5  |                                                                |
| 1434325_x_at | protein kinase, cAMP dependent regulatory, type I beta                                           | Prkar1b       | 539 | 5974  | 20.5 | cell proliferation-cell cycle development                      |

|              |                                                                                                 |               |     |       |      |                               |                                  |
|--------------|-------------------------------------------------------------------------------------------------|---------------|-----|-------|------|-------------------------------|----------------------------------|
| 1427482_a_at | carbonic anhydrase 8                                                                            | Car8          | 540 | 195   | 8.5  | signal transduction           | metabolism                       |
| 1423912_at   | alveolar soft part sarcoma chromosome region, candidate 1 (human)                               | Aspsc1        | 541 | 2870  | 4.5  | transport                     | cell organization and biogenesis |
| 1423488_at   | monocyte to macrophage differentiation-associated                                               | Mmd           | 542 | 2585  | 20.5 | death                         |                                  |
| 1418288_at   | lipin 1                                                                                         | Lpin1         | 543 | 30308 | 20.5 | development                   | metabolism                       |
| 1417378_at   | immunoglobulin superfamily, member 4A                                                           | Igsl4a        | 544 | 1728  | 0.5  | cell adhesion                 | death                            |
| 1440305_at   | ---                                                                                             | ---           | 545 | 25308 | 16.5 |                               |                                  |
| 1435529_at   | similar to interferon-induced protein with tetratricopeptide repeats 1                          | LOC667373     | 546 | 12588 | 4.5  |                               |                                  |
| 1434373_at   | RIKEN cDNA B930006L02 gene                                                                      | B930006L02Rik | 547 | 3921  | 20.5 |                               |                                  |
| 1431988_at   | RIKEN cDNA 1700112E06 gene                                                                      | 1700112E06Rik | 548 | 31808 | 8.5  |                               |                                  |
| 1451115_at   | protein inhibitor of activated STAT 3                                                           | Pias3         | 549 | 13924 | 0.5  | RNA metabolism-transcription  | protein metabolism               |
| 1450830_a_at | phosphodiesterase 6C, cGMP specific, cone, alpha prime                                          | Pde6c         | 550 | 878   | 16.5 | signal transduction           |                                  |
| 1448172_at   | malate dehydrogenase 1, NAD (soluble)                                                           | Mdh1          | 551 | 8827  | 20.5 | metabolism                    |                                  |
| 1433924_at   | paternally expressed 3                                                                          | Peg3          | 552 | 6365  | 20.5 | death                         |                                  |
| 1425286_at   | crystallin, gamma N                                                                             | Crygn         | 553 | 11889 | 0.5  |                               |                                  |
| 1421873_s_at | RAB24, member RAS oncogene family                                                               | Rab24         | 554 | 14201 | 0.5  | transport                     | signal transduction              |
| 1421824_at   | beta-site APP cleaving enzyme 1                                                                 | Bace1         | 555 | 14068 | 0.5  | protein metabolism            | metabolism                       |
| 1418648_at   | EGL nine homolog 3 (C. elegans)                                                                 | Egln3         | 556 | 330   | 0.5  | death                         | protein metabolism               |
| 1416581_at   | WD repeat domain 5                                                                              | Wdr5          | 557 | 289   | 12.5 | development                   | signal transduction              |
| 1416551_at   | ATPase, Ca++ transporting, cardiac muscle, slow twitch 2                                        | Atp2a2        | 558 | 12347 | 16.5 | transport                     | signal transduction              |
| 1456418_at   | Trinucleotide repeat containing 15                                                              | Tnrc15        | 559 | 334   | 4.5  |                               |                                  |
| 1454965_at   | RIKEN cDNA D430039N05 gene                                                                      | D430039N05Rik | 560 | 21185 | 0.5  | signal transduction           |                                  |
| 1432494_a_at | RIKEN cDNA 1700019E19 gene                                                                      | 1700019E19Rik | 561 | 11790 | 20.5 |                               |                                  |
| 1449821_a_at | RIKEN cDNA O610016J10 gene                                                                      | O610016J10Rik | 562 | 94    | 4.5  |                               |                                  |
| 1438902_a_at | heat shock protein 90kDa alpha (cytosolic), class A member 1                                    | Hsp90aa1      | 563 | 58    | 20.5 | stress response               | development                      |
| 1435371_x_at | carboxylesterase 3                                                                              | Ces3          | 564 | 2127  | 16.5 | metabolism                    |                                  |
| 1426906_at   | interferon activated gene 203                                                                   | Ifi203        | 565 | 15345 | 4.5  | RNA metabolism-transcription  | transport                        |
| 1425878_at   | calcium binding protein 4                                                                       | Cabp4         | 566 | 10279 | 20.5 | signal transduction           |                                  |
| 1421425_a_at | Down syndrome critical region gene 1-like 1                                                     | Dscr111       | 567 | 31462 | 20.5 | signal transduction           |                                  |
| 1418892_at   | ras homolog gene family, member J                                                               | Rhoj          | 568 | 124   | 0.5  | development                   | signal transduction              |
| 1439618_at   | phosphodiesterase 10A                                                                           | Pde10a        | 569 | 1111  | 4.5  | signal transduction           |                                  |
| 1437265_at   | RIKEN cDNA 5330438D12 gene                                                                      | 5330438D12Rik | 570 | 27700 | 0.5  |                               |                                  |
| 1428473_at   | protein phosphatase 3, catalytic subunit, beta isoform                                          | Ppp3cb        | 571 | 18147 | 20.5 | cell proliferation-cell cycle | RNA metabolism-transcription     |
| 1454690_at   | inhibitor of kappaB kinase gamma                                                                | Ikbkg         | 572 | 4490  | 0.5  | death                         | RNA metabolism-transcription     |
| 1448123_s_at | transforming growth factor, beta induced                                                        | Tgfb1         | 573 | 13740 | 20.5 | cell adhesion                 | cell proliferation-cell cycle    |
| 1426689_s_at | succinate dehydrogenase complex, subunit A, flavoprotein (Fp)                                   | Sdha          | 574 | 9244  | 0.5  | transport                     | metabolism                       |
| 1425536_at   | syntaxin 3                                                                                      | Sbx3          | 575 | 3614  | 0.5  | transport                     | cell organization and biogenesis |
| 1454961_at   | synaptotagmin 1                                                                                 | Synj1         | 576 | 11545 | 16.5 | transport                     | signal transduction              |
| 1444441_at   | Rap guanine nucleotide exchange factor (GEF)-like 1                                             | Rapgef1       | 577 | 23288 | 8.5  | signal transduction           |                                  |
| 1443232_at   | Vax2 opposite strand transcript 1                                                               | Vax2os1       | 578 | 3572  | 20.5 |                               |                                  |
| 1435848_at   | RIKEN cDNA D430041D05 gene                                                                      | D430041D05Rik | 579 | 32391 | 8.5  |                               |                                  |
| 1433761_at   | phosphodiesterase 4D interacting protein (myomegalin)                                           | Pde4dip       | 580 | 187   | 16.5 |                               |                                  |
| 1452259_at   | PHD finger protein 20                                                                           | Phf20         | 581 | 30077 | 0.5  | RNA metabolism-transcription  | metabolism                       |
| 1451200_at   | kinesin family member 1B                                                                        | Kif1b         | 582 | 4438  | 8.5  | cell-cell signaling           | transport                        |
| 1424092_at   | erythrocyte protein band 4.1                                                                    | Epb4.1        | 583 | 2429  | 4.5  | development                   | cell organization and biogenesis |
| 1419225_at   | calcium channel, voltage-dependent, alpha2/delta subunit 3                                      | Cacna2d3      | 584 | 2004  | 8.5  |                               |                                  |
| 1457825_x_at | transcobalamin 2                                                                                | Tcn2          | 585 | 10988 | 0.5  | transport                     |                                  |
| 1445179_at   | DNA segment, Chr 10, ERATO Doi 494, expressed                                                   | D10Ert494e    | 586 | 24538 | 12.5 |                               |                                  |
| 1442019_at   | Recoverin                                                                                       | Rcvrn         | 587 | 2390  | 20.5 | transport                     | signal transduction              |
| 1454606_at   | RIKEN cDNA 4933426M11 gene                                                                      | 4933426M11Rik | 588 | 4075  | 20.5 |                               |                                  |
| 1427952_at   | aryl hydrocarbon receptor-interacting protein-like 1                                            | Aip1          | 589 | 582   | 20.5 | death                         | protein metabolism               |
| 1425532_a_at | bridging integrator 1                                                                           | Bin1          | 590 | 6548  | 20.5 | cell proliferation-cell cycle | transport                        |
| 1424944_at   | Purkinje cell protein 2 (L7)                                                                    | Pcp2          | 591 | 20279 | 20.5 | signal transduction           |                                  |
| 1421821_at   | low density lipoprotein receptor                                                                | Ldlr          | 592 | 5892  | 4.5  | transport                     | protein metabolism               |
| 1418311_at   | fructosamine 3 kinase                                                                           | Fn3k          | 593 | 15896 | 0.5  | metabolism                    |                                  |
| 1416939_at   | pyrophosphatase (inorganic) 1                                                                   | Ppa1          | 594 | 9751  | 16.5 | metabolism                    |                                  |
| 1459043_at   | Transcribed locus                                                                               | ---           | 595 | 2946  | 16.5 |                               |                                  |
| 1455097_at   | WD repeat domain 70                                                                             | Wdr70         | 596 | 31027 | 4.5  |                               |                                  |
| 1444487_at   | lecithin-retinol acyltransferase (phosphatidylcholine-retinol-O-acyltransferase)                | Lrat#         | 597 | 162   | 12.5 | metabolism                    |                                  |
| 1435004_at   | pantothenate kinase 4                                                                           | Pank4         | 598 | 21126 | 20.5 | metabolism                    |                                  |
| 1428785_at   | angiominin-like 1                                                                               | Amotl1        | 599 | 8329  | 20.5 |                               |                                  |
| 1452769_at   | RIKEN cDNA 3732413111 gene                                                                      | 3732413111Rik | 600 | 1909  | 16.5 |                               |                                  |
| 1452669_at   | RIKEN cDNA 2810012G03 gene                                                                      | 2810012G03Rik | 601 | 4867  | 16.5 |                               |                                  |
| 1426604_at   | ribonuclease L (2', 5'-oligoadenylate synthetase-dependent)                                     | Rnasel        | 602 | 9062  | 4.5  | RNA metabolism-transcription  | protein metabolism               |
| 1424478_at   | Bardet-Biedl syndrome 2 homolog (human)                                                         | Bbs2          | 603 | 4688  | 0.5  | development                   | cell organization and biogenesis |
| 1458306_at   | phosphatidylinositol glycan anchor biosynthesis, class Z                                        | Pigz          | 604 | 15118 | 0.5  | protein metabolism            | metabolism                       |
| 1457342_at   | IKAROS family zinc finger 4                                                                     | Ikfz4         | 605 | 8632  | 0.5  | RNA metabolism-transcription  | metabolism                       |
| 1441706_at   | Down syndrome cell adhesion molecule-like 1                                                     | Dscaml1       | 606 | 2988  | 4.5  | cell adhesion                 | transport                        |
| 1440683_at   | RIKEN cDNA A930004D18 gene                                                                      | A930004D18Rik | 607 | 138   | 8.5  |                               |                                  |
| 1452654_at   | ---                                                                                             | ---           | 608 | 1544  | 20.5 |                               |                                  |
| 1449179_at   | phosducin                                                                                       | Pdc           | 609 | 3774  | 8.5  | signal transduction           |                                  |
| 1449081_at   | carboxylesterase 3                                                                              | Ces3          | 610 | 3992  | 16.5 | metabolism                    |                                  |
| 1438320_s_at | minichromosome maintenance deficient 7 (S. cerevisiae)                                          | Mcm7          | 611 | 3017  | 20.5 | cell proliferation-cell cycle | DNA metabolism                   |
| 1419023_x_at | enolase 1, alpha non-neuron                                                                     | Eno1          | 612 | 28938 | 16.5 | metabolism                    |                                  |
| 1460033_at   | RIKEN cDNA C030002C11 gene                                                                      | C030002C11Rik | 613 | 14123 | 0.5  |                               |                                  |
| 1428680_at   | CDP-diacylglycerol synthase 1                                                                   | Cds1          | 614 | 5348  | 20.5 | signal transduction           | metabolism                       |
| 1452514_a_at | kit oncogene                                                                                    | Kit           | 615 | 3519  | 20.5 | cell proliferation-cell cycle | development                      |
| 1451615_at   | cDNA sequence BC026374                                                                          | BC026374      | 616 | 4004  | 8.5  |                               |                                  |
| 1435857_s_at | amyloid beta (A4) precursor-like protein 1                                                      | Alpl1         | 617 | 25665 | 0.5  | cell adhesion                 | death                            |
| 1434190_at   | spermine synthase                                                                               | Sms           | 618 | 27904 | 8.5  | metabolism                    |                                  |
| 1433658_x_at | poly(rC) binding protein 4                                                                      | Pcbp4         | 619 | 601   | 20.5 | cell proliferation-cell cycle | death                            |
| 1428224_at   | heterogeneous nuclear ribonucleoprotein D-like                                                  | Hnrpd         | 620 | 9834  | 8.5  | RNA metabolism-transcription  | metabolism                       |
| 1426780_at   | DNA segment, Chr 14, ERATO Doi 436, expressed                                                   | D14Ert436e    | 621 | 6535  | 20.5 |                               |                                  |
| 1424211_at   | solute carrier family 25, member 33                                                             | Slc25a33      | 622 | 24579 | 20.5 | transport                     |                                  |
| 1421865_at   | diazepam binding inhibitor-like 5                                                               | Dbil5         | 623 | 18206 | 0.5  | transport                     |                                  |
| 1417839_at   | claudin 5                                                                                       | Cldn5         | 624 | 724   | 16.5 | cell adhesion                 |                                  |
| 1417385_at   | aminopeptidase puromycin sensitive                                                              | Npepps        | 625 | 5855  | 16.5 | protein metabolism            | metabolism                       |
| 1435836_at   | pyruvate dehydrogenase kinase, isoenzyme 1                                                      | Pdk1          | 626 | 3085  | 20.5 | signal transduction           | protein metabolism               |
| 1451978_at   | lysyl oxidase-like 1                                                                            | Lox1          | 627 | 1196  | 4.5  | protein metabolism            | metabolism                       |
| 1448323_a_at | biglycan                                                                                        | Bgn           | 628 | 17911 | 20.5 |                               |                                  |
| 1426805_at   | SWI/SNF related, matrix associated, actin dependent regulator of chromatin, subfamily a, member | Smarca4       | 629 | 17827 | 4.5  | DNA metabolism                | RNA metabolism-transcription     |
| 1425732_a_at | Max interacting protein 1                                                                       | Mxi1          | 630 | 3904  | 16.5 | RNA metabolism-transcription  | metabolism                       |
| 1418349_at   | heparin-binding EGF-like growth factor                                                          | Hbegf         | 631 | 32392 | 0.5  | cell proliferation-cell cycle | stress response                  |
| 1417500_a_at | transglutaminase 2, C polypeptide                                                               | Tgm2          | 632 | 393   | 0.5  | cell adhesion                 | signal transduction              |
| 1416407_at   | phosphoprotein enriched in astrocytes 15                                                        | Pea15         | 633 | 231   | 0.5  | death                         | transport                        |
| 1424437_s_at | ATP-binding cassette, sub-family G (WHITE), member 4                                            | Abcg4         | 634 | 1362  | 20.5 | transport                     |                                  |
| 1416746_at   | H2A histone family, member X                                                                    | H2afx         | 635 | 3034  | 20.5 | cell proliferation-cell cycle | DNA metabolism                   |
| 1430700_a_at | phospholipase A2, group VII (platelet-activating factor acetylhydrolase, plasma)                | Pla2g7        | 636 | 28981 | 20.5 | stress response               | metabolism                       |
| 1417471_s_at | DNA segment, Chr 1, ERATO Doi 622, expressed                                                    | D1Ert622e     | 637 | 2852  | 16.5 |                               |                                  |
| 1437210_a_at | bromodomain containing 2                                                                        | Brd2          | 638 | 21827 | 0.5  |                               |                                  |
| 1431754_at   | RIKEN cDNA 4930578N16 gene                                                                      | 4930578N16Rik | 639 | 13921 | 20.5 |                               |                                  |
| 1449407_at   | intraflagellar transport 81 homolog (Chlamydomonas)                                             | Ifi81         | 640 | 14398 | 8.5  | development                   |                                  |
| 1450149_a_at | protein phosphatase 1, catalytic subunit, gamma isoform                                         | Ppp1cc        | 641 | 1827  | 16.5 | cell proliferation-cell cycle | protein metabolism               |
| 1434235_at   | solute carrier family 20, member 2                                                              | Slc20a2       | 642 | 804   | 0.5  | transport                     |                                  |
| 1416104_at   | mannose-P-dolichol utilization defect 1                                                         | Mpdu1         | 643 | 7027  | 8.5  |                               |                                  |
| 1417409_at   | Jun oncogene                                                                                    | Jun           | 644 | 2828  | 16.5 | cell proliferation-cell cycle | RNA metabolism-transcription     |
| 1436520_at   | expressed sequence AI450948                                                                     | AI450948      | 645 | 27201 | 8.5  |                               |                                  |
| 1438160_x_at | solute carrier organic anion transporter family, member 4a1                                     | Sloc4a1       | 646 | 14507 | 16.5 | transport                     |                                  |
| 1418735_at   | keratin 4                                                                                       | Krt4          | 647 | 1184  | 20.5 | cell proliferation-cell cycle | development                      |

|              |                                                                                                 |               |     |       |      |                                  |                                  |
|--------------|-------------------------------------------------------------------------------------------------|---------------|-----|-------|------|----------------------------------|----------------------------------|
| 1449297_at   | caspace 12                                                                                      | Casp12        | 648 | 17305 | 4.5  | death                            | stress response                  |
| 1432195_s_at | cyclin L2                                                                                       | Ccn2          | 649 | 7643  | 16.5 | cell proliferation-cell cycle    | RNA metabolism-transcription     |
| 1450144_at   | phospholipase A2 receptor 1                                                                     | Pla2r1        | 650 | 2340  | 8.5  |                                  |                                  |
| 1428834_at   | dual specificity phosphatase 4                                                                  | Dusp4         | 651 | 304   | 4.5  | cell proliferation-cell cycle    | signal transduction              |
| 1426151_a_at | syntaxin 3                                                                                      | Stx3          | 652 | 1354  | 20.5 | transport                        | cell organization and biogenesis |
| 1436477_x_at | RAB2, member RAS oncogene family                                                                | Rab2          | 653 | 22223 | 20.5 | RNA metabolism-transcription     | transport                        |
| 1426915_at   | death associated protein kinase 1                                                               | Dapk1         | 654 | 419   | 20.5 | death                            | signal transduction              |
| 1415889_a_at | heat shock protein 90kDa beta (Grp94), member 1                                                 | Hsp90b1       | 655 | 230   | 20.5 | DNA metabolism                   | stress response                  |
| 1430158_at   | RIKEN cDNA 3110021A11 gene                                                                      | 3110021A11Rik | 656 | 1258  | 12.5 |                                  |                                  |
| 1422432_at   | diazepam binding inhibitor                                                                      | Dbi           | 657 | 10137 | 0.5  | transport                        |                                  |
| 1417156_at   | keratin 19                                                                                      | Krt19         | 658 | 2436  | 20.5 | development                      | cell organization and biogenesis |
| 1432848_a_at | RIKEN cDNA 120004M23 gene                                                                       | 120004M23Rik  | 659 | 7560  | 4.5  |                                  |                                  |
| 1433682_at   | Rho guanine nucleotide exchange factor (GEF) 17                                                 | Arhgef17      | 660 | 7100  | 0.5  | signal transduction              | cell organization and biogenesis |
| 1448594_at   | WNT1 inducible signaling pathway protein 1                                                      | Wisp1         | 661 | 6784  | 8.5  | cell adhesion                    | cell-cell signaling              |
| 1450634_at   | ATPase, H+ transporting, lysosomal V1 subunit A                                                 | Atp6v1a       | 662 | 30830 | 0.5  | transport                        | metabolism                       |
| 1449185_at   | cone-rod homeobox containing gene                                                               | Crx           | 663 | 358   | 20.5 | RNA metabolism-transcription     | development                      |
| 1425891_a_at | GH regulated TBC protein 1                                                                      | Grtp1         | 664 | 219   | 0.5  |                                  |                                  |
| 1417637_a_at | high mobility group 20 B                                                                        | Hmg20b        | 665 | 23818 | 0.5  | cell proliferation-cell cycle    | DNA metabolism                   |
| 1421027_a_at | myocyte enhancer factor 2C                                                                      | Mef2c         | 666 | 7431  | 4.5  | RNA metabolism-transcription     | development                      |
| 1427266_at   | polybromo 1                                                                                     | Pb1           | 667 | 13889 | 0.5  | RNA metabolism-transcription     | development                      |
| 1415945_at   | minichromosome maintenance deficient 5, cell division cycle 46 (S. cerevisiae)                  | Mcm5          | 668 | 9241  | 16.5 | cell proliferation-cell cycle    | DNA metabolism                   |
| 1426752_at   | PHD finger protein 17                                                                           | Pfih7         | 669 | 9004  | 20.5 | death                            | RNA metabolism-transcription     |
| 1451210_at   | phosphatidic acid phosphatase type 2c                                                           | Ppap2c        | 670 | 20759 | 20.5 |                                  |                                  |
| 1436383_at   | complexin 2                                                                                     | Cplx2         | 671 | 16230 | 20.5 | transport                        | cell organization and biogenesis |
| 1423784_at   | glycyl-tRNA synthetase                                                                          | Gars          | 672 | 108   | 4.5  | RNA metabolism-transcription     | transport                        |
| 1426519_at   | procollagen-proline, 2-oxoglutarate 4-dioxygenase (proline 4-hydroxylase), alpha 1 polypeptide  | P4ha1         | 673 | 29286 | 16.5 | protein metabolism               | metabolism                       |
| 1422495_a_at | high mobility group nucleosomal binding domain 1                                                | Hmgn1         | 674 | 2667  | 20.5 | DNA metabolism                   | stress response                  |
| 1418649_at   | EGL nine homolog 3 (C. elegans)                                                                 | Egl3          | 675 | 89    | 4.5  | death                            | protein metabolism               |
| 1428572_at   | brain abundant, membrane attached signal protein 1                                              | Basp1         | 676 | 23611 | 0.5  | RNA metabolism-transcription     | metabolism                       |
| 1452345_at   | leiomodulin 2 (cardiac)                                                                         | Lmod2         | 677 | 461   | 12.5 |                                  |                                  |
| 1451703_s_at | ---                                                                                             | ---           | 678 | 1406  | 4.5  |                                  |                                  |
| 1426160_a_at | serine/threonine kinase 16                                                                      | Stk16         | 679 | 11877 | 0.5  | protein metabolism               | metabolism                       |
| 1428285_at   | RIKEN cDNA 8430427H17 gene                                                                      | 8430427H17Rik | 680 | 7153  | 0.5  |                                  |                                  |
| 1417077_at   | B-cell receptor-associated protein 29                                                           | Bcap29        | 681 | 1392  | 8.5  | death                            | transport                        |
| 1425974_a_at | tripartite motif protein 25                                                                     | Trim25#       | 682 | 141   | 0.5  |                                  |                                  |
| 1420986_s_at | ---                                                                                             | ---           | 683 | 4323  | 0.5  |                                  |                                  |
| 1416406_at   | phosphoprotein enriched in astrocytes 15                                                        | Pea15         | 684 | 8928  | 0.5  | death                            | transport                        |
| 1431337_a_at | RIKEN cDNA 1810055E12 gene                                                                      | 1810055E12Rik | 685 | 679   | 4.5  |                                  |                                  |
| 1419874_x_at | zinc finger and BTB domain containing 16                                                        | Zbtb16        | 686 | 430   | 12.5 | cell proliferation-cell cycle    | death                            |
| 1416748_a_at | meiotic recombination 11 homolog A (S. cerevisiae)                                              | Mre11a        | 687 | 7641  | 8.5  | cell proliferation-cell cycle    | DNA metabolism                   |
| 1446242_at   | RIKEN cDNA 4930535B03 gene                                                                      | 4930535B03Rik | 688 | 30244 | 12.5 |                                  |                                  |
| 1425256_a_at | DIX domain containing 1                                                                         | Dixdc1        | 689 | 630   | 20.5 | development                      | signal transduction              |
| 1437214_at   | leucine rich repeat transmembrane neuronal 4                                                    | Lrrtm4        | 690 | 4433  | 16.5 |                                  |                                  |
| 1418625_s_at | similar to glyceraldehyde-3-phosphate dehydrogenase                                             | LOC144433     | 691 | 11036 | 0.5  | metabolism                       |                                  |
| 1423810_at   | protein phosphatase methyltransferase 1                                                         | Ppme1         | 692 | 6877  | 20.5 | protein metabolism               | metabolism                       |
| 1459347_at   | ---                                                                                             | ---           | 693 | 32393 | 16.5 |                                  |                                  |
| 1452661_at   | transferrin receptor                                                                            | Tfrc          | 694 | 4175  | 16.5 | transport                        | protein metabolism               |
| 1431901_a_at | 6-phosphofructo-2-kinase/fructose-2,6-bisphosphatase 2                                          | Pfkfb2        | 695 | 4340  | 16.5 | metabolism                       |                                  |
| 1420339_at   | RIKEN cDNA 0610016J10 gene                                                                      | 0610016J10Rik | 696 | 24159 | 4.5  |                                  |                                  |
| 1415871_at   | transforming growth factor, beta induced                                                        | Tgfb1         | 697 | 1189  | 20.5 | cell adhesion                    | cell proliferation-cell cycle    |
| 1455098_a_at | vitronectin                                                                                     | Vtn           | 698 | 31269 | 12.5 | cell adhesion                    |                                  |
| 1422907_at   | guanine nucleotide binding protein, alpha transducing 2                                         | Gnat2         | 699 | 1618  | 0.5  | signal transduction              |                                  |
| 1452895_at   | F-box protein 45                                                                                | Fbxo45        | 700 | 15436 | 0.5  | protein metabolism               | metabolism                       |
| 1460617_s_at | RAB6B, member RAS oncogene family                                                               | Rab6b         | 701 | 25170 | 20.5 | transport                        | signal transduction              |
| 1455205_a_at | ubiquitin specific peptidase 19                                                                 | Usp19         | 702 | 9996  | 0.5  | protein metabolism               | metabolism                       |
| 1429861_at   | protocadherin 9                                                                                 | Pcdh9         | 703 | 27930 | 20.5 | cell adhesion                    |                                  |
| 1450453_a_at | phosphodiesterase 6G, cGMP-specific, rod, gamma                                                 | Pde6g         | 704 | 361   | 20.5 | signal transduction              |                                  |
| 1455972_x_at | hydroxyacyl-Coenzyme A dehydrogenase                                                            | Hadh          | 705 | 8332  | 20.5 | metabolism                       |                                  |
| 1453721_a_at | solute carrier family 31, member 2                                                              | Slc31a2       | 706 | 6482  | 12.5 | transport                        |                                  |
| 1416135_at   | apurinic/apyrimidinic endonuclease 1                                                            | Ape1          | 707 | 1153  | 8.5  | DNA metabolism                   | RNA metabolism-transcription     |
| 1450522_a_at | H1 histone family, member 0                                                                     | H1f0          | 708 | 222   | 8.5  | DNA metabolism                   | cell organization and biogenesis |
| 1424650_at   | protein disulfide isomerase associated 5                                                        | Pdia5         | 709 | 15754 | 4.5  | stress response                  | protein metabolism               |
| 1433446_at   | 3-hydroxy-3-methylglutaryl-Coenzyme A synthase 1                                                | Hmgcs1        | 710 | 311   | 4.5  | metabolism                       |                                  |
| 1450945_at   | protein kinase C, alpha                                                                         | Prkca         | 711 | 11916 | 16.5 | cell proliferation-cell cycle    | death                            |
| 1455031_at   | ---                                                                                             | ---           | 712 | 313   | 20.5 |                                  |                                  |
| 1441233_at   | Signal recognition particle 54                                                                  | Srp54         | 713 | 3497  | 20.5 | transport                        | cell organization and biogenesis |
| 1435148_at   | ATPase, Na+/K+ transporting, beta 2 polypeptide                                                 | Atp1b2        | 714 | 6800  | 16.5 | cell adhesion                    | transport                        |
| 1435869_s_at | adaptor protein complex AP-2, alpha 2 subunit                                                   | Ap2a2         | 715 | 7735  | 8.5  | transport                        | cell organization and biogenesis |
| 1435407_at   | Adult male medulla oblongata cDNA, RIKEN full-length enriched library, clone:6332404K23 product | ---           | 716 | 10281 | 12.5 |                                  |                                  |
| 1423180_at   | potassium voltage gated channel, Shab-related subfamily, member 1                               | Kcnb1         | 717 | 26661 | 16.5 | transport                        |                                  |
| 1452213_at   | testis expressed gene 2                                                                         | Tex2          | 718 | 4086  | 20.5 |                                  |                                  |
| 1415998_at   | voltage-dependent anion channel 1                                                               | Vdac1         | 719 | 27315 | 20.5 | cell-cell signaling              | death                            |
| 1452440_at   | tumor necrosis factor (ligand) superfamily, member 12                                           | Tnfsf12       | 720 | 559   | 12.5 | cell proliferation-cell cycle    | death                            |
| 1417664_a_at | N-myc downstream regulated gene 3                                                               | Ndr3          | 721 | 110   | 20.5 | development                      | cell organization and biogenesis |
| 1423643_at   | DEAD (Asp-Glu-Ala-Asp) box polypeptide 39                                                       | Ddx39         | 722 | 2433  | 4.5  | RNA metabolism-transcription     | transport                        |
| 1439107_a_at | myeloid/lymphoid or mixed-lineage leukemia 5                                                    | Mll5          | 723 | 15207 | 0.5  | RNA metabolism-transcription     | metabolism                       |
| 1459617_at   | Mitogen activated protein kinase 14                                                             | Mapk14        | 724 | 7133  | 0.5  | cell proliferation-cell cycle    | RNA metabolism-transcription     |
| 1451128_s_at | kinesin family member 22                                                                        | Kif22         | 725 | 21930 | 20.5 | transport                        | cell organization and biogenesis |
| 1436334_at   | synaptotagmin 1                                                                                 | Synj1         | 726 | 5027  | 20.5 | transport                        | signal transduction              |
| 1437378_x_at | scavenger receptor class B, member 1                                                            | Scarb1        | 727 | 22886 | 20.5 | cell adhesion                    | death                            |
| 1420622_a_at | heat shock protein 8                                                                            | Hspa8         | 728 | 86    | 16.5 | cell proliferation-cell cycle    | stress response                  |
| 1456953_at   | procollagen, type XIX, alpha 1                                                                  | Col19a1       | 729 | 11218 | 4.5  | cell adhesion                    | transport                        |
| 1424458_at   | jumonji domain containing 2C                                                                    | Jmjd2c        | 730 | 1316  | 4.5  | DNA metabolism                   | RNA metabolism-transcription     |
| 1441850_x_at | transcobalamin 2                                                                                | Tcn2          | 731 | 13964 | 20.5 | transport                        |                                  |
| 1448414_at   | RAD1 homolog (S. pombe)                                                                         | Rad1          | 732 | 29802 | 0.5  | cell proliferation-cell cycle    | DNA metabolism                   |
| 1429240_at   | STAR-related lipid transfer (START) domain containing 4                                         | Star4         | 733 | 1066  | 4.5  | transport                        | metabolism                       |
| 1438562_a_at | protein tyrosine phosphatase, non-receptor type 2                                               | Ptpn2         | 734 | 8459  | 16.5 | signal transduction              | protein metabolism               |
| 1448416_at   | matrix Gla protein                                                                              | Mgp           | 735 | 1031  | 20.5 | development                      |                                  |
| 1448382_at   | enoyl-Coenzyme A, hydratase/3-hydroxyacyl Coenzyme A dehydrogenase                              | Ehhadh        | 736 | 10512 | 20.5 | metabolism                       |                                  |
| 1434290_at   | glycosyltransferase-like domain containing 1                                                    | Gtdc1         | 737 | 8303  | 0.5  | metabolism                       |                                  |
| 1441091_at   | Transcribed locus                                                                               | ---           | 738 | 1363  | 4.5  |                                  |                                  |
| 1448496_a_at | inhibitor of growth family, member 1                                                            | Ing1          | 739 | 28969 | 20.5 | cell proliferation-cell cycle    | RNA metabolism-transcription     |
| 1431300_at   | SH3-domain GRB2-like (endophilin) interacting protein 1                                         | Sgip1         | 740 | 4140  | 8.5  | DNA metabolism                   | metabolism                       |
| 1438418_at   | RIKEN cDNA 4932432K03 gene                                                                      | 4932432K03Rik | 741 | 16266 | 0.5  | transport                        | cell organization and biogenesis |
| 1426473_at   | DnaJ (Hsp40) homolog, subfamily C, member 9                                                     | Dnajc9        | 742 | 21134 | 16.5 | protein metabolism               | metabolism                       |
| 1437280_s_at | Serpine 1 mRNA binding protein 1                                                                | Serp1         | 743 | 2824  | 12.5 | RNA metabolism-transcription     | metabolism                       |
| 1436059_at   | regulatory factor X, 1 (influences HLA class II expression)                                     | Rfx1          | 744 | 20353 | 0.5  | RNA metabolism-transcription     | metabolism                       |
| 1425810_a_at | cysteine and glycine-rich protein 1                                                             | Csrp1         | 745 | 20245 | 20.5 | cell organization and biogenesis |                                  |
| 1433733_a_at | cryptochrome 1 (photolyase-like)                                                                | Cry1          | 746 | 16488 | 12.5 | DNA metabolism                   | RNA metabolism-transcription     |
| 1442819_at   | rhomboid, veinlet-like 2 (Drosophila)                                                           | Rhbdl2        | 747 | 7546  | 12.5 |                                  |                                  |
| 1427042_at   | mal, T-cell differentiation protein 2                                                           | Mal2          | 748 | 649   | 4.5  |                                  |                                  |
| 1416395_at   | guanylate kinase 1                                                                              | Guk1          | 749 | 5739  | 0.5  | transport                        |                                  |
| 1419127_at   | neuropeptide Y                                                                                  | Npy           | 750 | 1727  | 4.5  | cell-cell signaling              | cell proliferation-cell cycle    |
| 1454692_x_at | Heterogeneous nuclear ribonucleoprotein K                                                       | Hnrpk         | 751 | 687   | 8.5  | RNA metabolism-transcription     | metabolism                       |
| 1433888_at   | ATPase, Ca++ transporting, plasma membrane 2                                                    | Atp2b2        | 752 | 13195 | 0.5  | cell-cell signaling              | transport                        |
| 1415677_at   | dehydrogenase/reductase (SDR family) member 1                                                   | Dhrs1         | 753 | 3688  | 20.5 | metabolism                       |                                  |
| 1448960_at   | CXXC finger 5                                                                                   | Cxxc5         | 754 | 12813 | 16.5 |                                  |                                  |
| 1431919_at   | rotatin                                                                                         | Rttn          | 755 | 20133 | 8.5  | development                      |                                  |

|               |                                                                                             |               |     |       |      |                                  |                                  |
|---------------|---------------------------------------------------------------------------------------------|---------------|-----|-------|------|----------------------------------|----------------------------------|
| 1452968_at    | collagen triple helix repeat containing 1                                                   | Cthrc1        | 756 | 8746  | 12.5 | transport                        |                                  |
| 1417932_at    | interleukin 18                                                                              | Ifi8          | 757 | 152   | 0.5  | cell adhesion                    | cell-cell signaling              |
| 1434793_at    | WD repeat domain 78                                                                         | Wdr78         | 758 | 15481 | 0.5  |                                  |                                  |
| 1434515_at    | nuclear receptor coactivator 1                                                              | Ncoa1         | 759 | 5466  | 20.5 | RNA metabolism-transcription     | signal transduction              |
| 1428914_at    | RIKEN cDNA 2310014D11 gene                                                                  | 2310014D11Rik | 760 | 14313 | 20.5 |                                  |                                  |
| 1457290_at    | mab-21-like 1 (C. elegans)                                                                  | Mab21l1       | 761 | 1953  | 8.5  | cell proliferation-cell cycle    | transport                        |
| 1448161_a_at  | chloride channel 4-2                                                                        | Clcn4-2       | 762 | 23198 | 20.5 | transport                        |                                  |
| 1451236_at    | RAS-like, estrogen-regulated, growth-inhibitor                                              | Rerg          | 763 | 4377  | 0.5  | cell proliferation-cell cycle    | development                      |
| 1417376_a_at  | immunoglobulin superfamily, member 4A                                                       | Igsf4a        | 764 | 279   | 4.5  | cell adhesion                    | death                            |
| 1423994_at    | kinesin family member 1B                                                                    | Kif1b         | 765 | 9152  | 4.5  | cell-cell signaling              | transport                        |
| 1424015_at    | Rab6 interacting protein 1                                                                  | Rab6ip1       | 766 | 11930 | 20.5 |                                  |                                  |
| 1448830_at    | dual specificity phosphatase 1                                                              | Dusp1         | 767 | 264   | 12.5 | cell proliferation-cell cycle    | stress response                  |
| 1448867_at    | TMEM9 domain family, member B                                                               | Tmem9b        | 768 | 29855 | 0.5  | signal transduction              |                                  |
| AFFX-b-ActinM | actin, beta, cytoplasmic                                                                    | Actb          | 769 | 1179  | 4.5  | M12481_5_at                      |                                  |
| 1445091_at    | ataxia telangiectasia and Rad3 related                                                      | Atr           | 770 | 30478 | 4.5  | cell proliferation-cell cycle    | DNA metabolism                   |
| 1423892_at    | amyloid beta (A4) precursor protein-binding, family B, member 1                             | Apbb1         | 771 | 21933 | 20.5 | cell proliferation-cell cycle    | RNA metabolism-transcription     |
| 1417579_x_at  | GDP-mannose pyrophosphorylase A                                                             | Gmppa         | 772 | 22110 | 20.5 | metabolism                       |                                  |
| 1416326_at    | cysteine-rich protein 1 (intestinal)                                                        | Crip1         | 773 | 5438  | 20.5 |                                  |                                  |
| 1425590_s_at  | aryl hydrocarbon receptor-interacting protein-like 1                                        | Aip1          | 774 | 15375 | 20.5 | death                            | protein metabolism               |
| 1449054_a_at  | poly(R) binding protein 4                                                                   | Pcbp4         | 775 | 10063 | 20.5 | cell proliferation-cell cycle    | death                            |
| 1457264_at    | PHD finger protein 20-like 1                                                                | Phf20l1       | 776 | 1936  | 8.5  | RNA metabolism-transcription     | metabolism                       |
| 1416914_s_at  | mammary tumor virus receptor 2                                                              | Mtvr2         | 777 | 8264  | 0.5  | cell proliferation-cell cycle    |                                  |
| 1424250_a_at  | Rho guanine nucleotide exchange factor (GEF) 3                                              | Arhgef3       | 778 | 5091  | 20.5 | signal transduction              |                                  |
| 1423179_at    | potassium voltage gated channel, Shab-related subfamily, member 1                           | Kcnb1         | 779 | 28822 | 20.5 | transport                        |                                  |
| 1436656_at    | cDNA sequence BC062109                                                                      | BC062109      | 780 | 13207 | 20.5 |                                  |                                  |
| 1421142_s_at  | forkhead box P1                                                                             | Foxp1         | 781 | 24887 | 20.5 | RNA metabolism-transcription     | development                      |
| 1451151_s_at  | zinc finger protein 410                                                                     | Zfp410        | 782 | 348   | 16.5 | RNA metabolism-transcription     | metabolism                       |
| 1453143_at    | galactosidase, beta 1 like 3                                                                | Glb1l3        | 783 | 3854  | 20.5 | metabolism                       |                                  |
| 1434130_at    | lipoma HMGIC fusion partner-like 2                                                          | Lhfp12        | 784 | 13007 | 20.5 | metabolism                       |                                  |
| 1428915_at    | sirtuin 5 (silent mating type information regulation 2 homolog) 5 (S. cerevisiae)           | Sirt5         | 785 | 4779  | 4.5  | DNA metabolism                   | RNA metabolism-transcription     |
| 1449626_s_at  | acyl-Coenzyme A binding domain containing 4                                                 | Acbd4         | 786 | 23974 | 0.5  |                                  |                                  |
| 1419449_a_at  | guanine nucleotide binding protein, alpha inhibiting 2                                      | Gnai2         | 787 | 935   | 4.5  | cell proliferation-cell cycle    | signal transduction              |
| 1434800_at    | synaptic vesicle glycoprotein 2 b                                                           | Sv2b          | 788 | 67    | 8.5  | cell-cell signaling              | transport                        |
| 1452444_at    | N-ethylmaleimide sensitive fusion protein attachment protein beta                           | Napb          | 789 | 27071 | 20.5 | transport                        | cell organization and biogenesis |
| 1434676_at    | myotubularin related protein 9                                                              | Mltnr9        | 790 | 6822  | 4.5  | protein metabolism               | metabolism                       |
| 1428095_a_at  | transmembrane protein 24                                                                    | Tmem24        | 791 | 246   | 20.5 |                                  |                                  |
| 1437223_s_at  | X-box binding protein 1                                                                     | Xbp1          | 792 | 1030  | 16.5 | RNA metabolism-transcription     | metabolism                       |
| 1447901_x_at  | Sfi1 homolog, spindle assembly associated (yeast)                                           | Sfi1          | 793 | 24541 | 0.5  |                                  |                                  |
| 1427894_at    | vasorin                                                                                     | Vasn          | 794 | 28322 | 16.5 |                                  |                                  |
| 1460672_at    | RIKEN cDNA 2410002F23 gene                                                                  | 2410002F23Rik | 795 | 2366  | 8.5  |                                  |                                  |
| 1450700_at    | CDC42 effector protein (Rho GTPase binding) 3                                               | Cdc42ep3      | 796 | 16347 | 0.5  | development                      | cell organization and biogenesis |
| 1449348_at    | membrane protein, palmitoylated 6 (MAGUK p55 subfamily member 6)                            | Mmp6          | 797 | 31832 | 16.5 | protein metabolism               | metabolism                       |
| 1457666_s_at  | interferon activated gene 202B                                                              | Ifi202b       | 798 | 21117 | 4.5  |                                  |                                  |
| 1422470_at    | BCL2/adenovirus E1B interacting protein 1, NIP3                                             | Bnip3         | 799 | 16877 | 20.5 | death                            | DNA metabolism                   |
| 1460601_at    | myosin VIIA and Rab interacting protein                                                     | Myrip         | 800 | 4378  | 20.5 | transport                        | cell organization and biogenesis |
| 1426696_at    | low density lipoprotein receptor-related protein associated protein 1                       | Lrpap1        | 801 | 23446 | 20.5 | cell proliferation-cell cycle    | transport                        |
| 1427878_at    | RIKEN cDNA 0610010O12 gene                                                                  | 0610010O12Rik | 802 | 5807  | 16.5 |                                  |                                  |
| 1457842_at    | Zinc finger protein 292                                                                     | Zfp292        | 803 | 2006  | 20.5 | stress response                  | protein metabolism               |
| 1430244_at    | RIKEN cDNA 4921509J17 gene                                                                  | 4921509J17Rik | 804 | 701   | 20.5 |                                  |                                  |
| 1449556_at    | histocompatibility 2, T region locus 23                                                     | H2-T23        | 805 | 2604  | 0.5  |                                  |                                  |
| 1451124_at    | superoxide dismutase 1, soluble                                                             | Sod1          | 806 | 29572 | 20.5 | death                            | DNA metabolism                   |
| 1445359_at    | adenylate cyclase 1                                                                         | Adcy1         | 807 | 21374 | 4.5  | signal transduction              | metabolism                       |
| 1425629_a_at  | nucleolar protein family 6 (RNA-associated)                                                 | Nol6          | 808 | 22234 | 12.5 | RNA metabolism-transcription     | cell organization and biogenesis |
| 1434179_at    | myeloid/lymphoid or mixed-lineage leukemia 3                                                | Mil3          | 809 | 19162 | 16.5 | DNA metabolism                   | RNA metabolism-transcription     |
| 1419414_at    | guanine nucleotide binding protein 13, gamma                                                | Gng13         | 810 | 32336 | 20.5 | signal transduction              |                                  |
| 1449897_a_at  | mature T-cell proliferation 1                                                               | Mtcp1         | 811 | 28576 | 16.5 | cell proliferation-cell cycle    |                                  |
| 1451335_at    | placenta-specific 8                                                                         | Plac8         | 812 | 1420  | 8.5  |                                  |                                  |
| 1456081_a_at  | acetoacetyl-CoA synthetase                                                                  | Aacs          | 813 | 2622  | 4.5  | metabolism                       |                                  |
| 1439168_at    | calcium/calmodulin-dependent protein kinase II, delta                                       | Camk2d        | 814 | 521   | 4.5  | cell proliferation-cell cycle    | transport                        |
| 1427943_at    | acylphosphatase 2, muscle type                                                              | Acp2          | 815 | 1214  | 12.5 | metabolism                       |                                  |
| 1417946_at    | abhydrolase domain containing 3                                                             | Abhd3         | 816 | 1313  | 16.5 |                                  |                                  |
| 1455562_at    | SRY-box containing gene 12                                                                  | Sox12         | 817 | 9043  | 8.5  | RNA metabolism-transcription     | metabolism                       |
| 1456250_x_at  | transforming growth factor, beta induced                                                    | Tgfb          | 818 | 16644 | 20.5 | cell adhesion                    | cell proliferation-cell cycle    |
| 1460367_at    | high mobility group box transcription factor 1                                              | Hbp1          | 819 | 25538 | 16.5 | cell proliferation-cell cycle    | RNA metabolism-transcription     |
| 1447734_x_at  | aldolase 1, A isoform                                                                       | Aldoa         | 820 | 1525  | 20.5 | metabolism                       |                                  |
| 1460498_a_at  | DnaJ (Hsp40) homolog, subfamily C, member 5                                                 | Dnajc5        | 821 | 23917 | 20.5 | protein metabolism               | metabolism                       |
| 1419247_at    | regulator of G-protein signaling 2                                                          | Rgs2          | 822 | 28935 | 0.5  | cell proliferation-cell cycle    | signal transduction              |
| 1440861_a_at  | ---                                                                                         | ---           | 823 | 27039 | 8.5  |                                  |                                  |
| 1451461_a_at  | aldolase 3, C isoform                                                                       | Aldoc         | 824 | 12780 | 0.5  | metabolism                       |                                  |
| 1418626_a_at  | clusterin                                                                                   | Clu           | 825 | 378   | 0.5  | death                            | metabolism                       |
| 1435199_at    | Adenomatous polyposis coli 2                                                                | Apc2          | 826 | 15653 | 12.5 | cell proliferation-cell cycle    | signal transduction              |
| 1417938_at    | RAD51 associated protein 1                                                                  | Rad51ap1      | 827 | 12856 | 12.5 | DNA metabolism                   | stress response                  |
| 1455013_at    | ariadne homolog 2 (Drosophila)                                                              | Arih2         | 828 | 16238 | 0.5  | development                      | protein metabolism               |
| 1452058_a_at  | ring finger protein 11                                                                      | Rnf11         | 829 | 4698  | 20.5 | protein metabolism               | metabolism                       |
| 1450052_at    | kinesin family member 2A                                                                    | Kif2a         | 830 | 641   | 20.5 | transport                        | cell organization and biogenesis |
| 1430082_at    | WD repeat domain 64                                                                         | Wdr64         | 831 | 18043 | 12.5 |                                  |                                  |
| 1435816_at    | ribosomal protein S6                                                                        | Rps6          | 832 | 28434 | 12.5 | cell organization and biogenesis | protein metabolism               |
| 1422159_at    | protein phosphatase, EF hand calcium-binding domain 2                                       | Ppef2         | 833 | 1283  | 20.5 |                                  |                                  |
| 1440817_x_at  | zinc finger protein 771                                                                     | Zfp771        | 834 | 12509 | 0.5  |                                  |                                  |
| 1448226_at    | ribonucleotide reductase M2                                                                 | Rrm2          | 835 | 338   | 20.5 | DNA metabolism                   | metabolism                       |
| 1452428_a_at  | beta-2 microglobulin                                                                        | B2m           | 836 | 27077 | 8.5  |                                  |                                  |
| 1450541_at    | plasmacytoma variant translocation 1                                                        | Pvt1          | 837 | 25306 | 8.5  | DNA metabolism                   | cell organization and biogenesis |
| 1446376_at    | ribosomal protein S6 kinase, polypeptide 1                                                  | Rps6kb1       | 838 | 8094  | 16.5 | development                      | signal transduction              |
| 1416041_at    | serum/glucocorticoid regulated kinase                                                       | Sgk           | 839 | 371   | 12.5 | death                            | stress response                  |
| 1434141_at    | guanylate cyclase 1, soluble, alpha 3                                                       | Gucy1a3       | 840 | 28625 | 20.5 | signal transduction              | metabolism                       |
| 1427623_at    | hect (homologous to the E6-AP (UBE3A) carboxyl terminus) domain and RCC1 (CHC1)-like domain | Herc2         | 841 | 25310 | 8.5  | transport                        | cell organization and biogenesis |
| 1438754_at    | ---                                                                                         | ---           | 842 | 28416 | 12.5 |                                  |                                  |
| 1434822_at    | periplin 1                                                                                  | Pphl1         | 843 | 31039 | 4.5  | development                      |                                  |
| 1435872_at    | Proviral integration site 1                                                                 | Pim1          | 844 | 4139  | 20.5 | cell proliferation-cell cycle    | death                            |
| 1436870_s_at  | expressed sequence AU041783                                                                 | AU041783      | 845 | 9075  | 0.5  |                                  |                                  |
| 1443953_at    | testis expressed gene 2                                                                     | Tex2          | 846 | 16059 | 8.5  |                                  |                                  |
| 1417810_a_at  | potassium voltage gated channel, Shab-related subfamily, member 1                           | Kcnb1         | 847 | 1794  | 4.5  | transport                        | signal transduction              |
| 1422768_at    | synaptotagmin binding, cytoplasmic RNA interacting protein                                  | Syncrip       | 848 | 26458 | 4.5  | RNA metabolism-transcription     | metabolism                       |
| 1427050_at    | RIKEN cDNA 5730420B22 gene                                                                  | 5730420B22Rik | 849 | 3523  | 16.5 | metabolism                       |                                  |
| 1423935_x_at  | keratin 14                                                                                  | Krt14         | 850 | 6652  | 12.5 | development                      | cell organization and biogenesis |
| 1440851_at    | RIKEN cDNA 4933407N01 gene                                                                  | 4933407N01Rik | 851 | 19279 | 16.5 |                                  |                                  |
| 1454645_at    | mahogunin, ring finger 1                                                                    | Mgn1          | 852 | 28284 | 20.5 | protein metabolism               | metabolism                       |
| 1447816_x_at  | oxidoreductase NAD-binding domain containing 1                                              | Oxdn1         | 853 | 29718 | 12.5 | metabolism                       |                                  |
| 1417140_a_at  | protein tyrosine phosphatase, non-receptor type 2                                           | Ptpn2         | 854 | 22123 | 0.5  | signal transduction              | protein metabolism               |
| 1439049_at    | DPH5 homolog (S. cerevisiae)                                                                | Dph5          | 855 | 18571 | 12.5 | protein metabolism               | metabolism                       |
| 1425674_a_at  | Ssu72 RNA polymerase II CTD phosphatase homolog (yeast)                                     | Ssu72         | 856 | 23285 | 20.5 |                                  |                                  |
| 1428284_at    | RIKEN cDNA 8430427H17 gene                                                                  | 8430427H17Rik | 857 | 9987  | 0.5  |                                  |                                  |
| 1432144_a_at  | ring finger and CHY zinc finger domain containing 1                                         | Rchy1         | 858 | 13747 | 0.5  |                                  |                                  |
| 1456445_at    | RIKEN cDNA 4930563D23 gene                                                                  | 4930563D23Rik | 859 | 17124 | 8.5  |                                  |                                  |
| 1428055_at    | RNA imprinted and accumulated in nucleus                                                    | Rian          | 860 | 14008 | 4.5  |                                  |                                  |
| 1437875_at    | bicaudal D homolog 2 (Drosophila)                                                           | Bicd2         | 861 | 15594 | 0.5  | transport                        | cell organization and biogenesis |
| 1433847_at    | RIKEN cDNA D330017J20 gene                                                                  | D330017J20Rik | 862 | 283   | 4.5  |                                  |                                  |
| 1416127_a_at  | aspartyl aminopeptidase                                                                     | Dnpep         | 863 | 18266 | 20.5 | protein metabolism               | metabolism                       |



|              |                                                                                          |               |     |       |      |                                  |                                  |
|--------------|------------------------------------------------------------------------------------------|---------------|-----|-------|------|----------------------------------|----------------------------------|
| 1429415_at   | protein kinase C binding protein 1                                                       | Prkcbp1       | 864 | 445   | 20.5 | RNA metabolism-transcription     | metabolism                       |
| 1434702_at   | RIKEN cDNA 2600009E05 gene                                                               | 2600009E05Rik | 865 | 22713 | 0.5  |                                  |                                  |
| 1418932_at   | nuclear factor, interleukin 3, regulated                                                 | Nflf3         | 866 | 247   | 20.5 | RNA metabolism-transcription     | metabolism                       |
| 1420397_a_at | SPEN homolog, transcriptional regulator (Drosophila)                                     | Spn           | 867 | 810   | 0.5  | RNA metabolism-transcription     | transport                        |
| 1441945_s_at | abhydrolase domain containing 14A                                                        | Abhd14a       | 868 | 20391 | 20.5 | metabolism                       |                                  |
| 1454975_at   | coiled-coil domain containing 131                                                        | Ccdc131       | 869 | 1901  | 16.5 | RNA metabolism-transcription     | metabolism                       |
| 1423224_at   | RIKEN cDNA 4432405B04 gene                                                               | 4432405B04Rik | 870 | 11297 | 16.5 |                                  |                                  |
| 1426997_at   | thyroid hormone receptor alpha                                                           | Thra          | 871 | 31352 | 16.5 | RNA metabolism-transcription     | development                      |
| 1453569_s_at | ---                                                                                      | ---           | 872 | 14242 | 16.5 | death                            | development                      |
| 1433628_at   | coenzyme Q10 homolog A (yeast)                                                           | Coq10a        | 873 | 1004  | 20.5 |                                  |                                  |
| 1447892_at   | ---                                                                                      | ---           | 874 | 4117  | 20.5 | metabolism                       |                                  |
| 1458612_at   | RIKEN cDNA A930006A01 gene                                                               | A930006A01Rik | 875 | 22115 | 12.5 |                                  |                                  |
| 1434867_at   | solute carrier family 4, sodium bicarbonate transporter-like, member 11                  | Sic4a11       | 876 | 66    | 0.5  | transport                        |                                  |
| 1422050_at   | NK1 transcription factor related, locus 2 (Drosophila)                                   | Nkx1-2        | 877 | 5962  | 16.5 | RNA metabolism-transcription     | development                      |
| 1417233_at   | coiled-coil-helix-coiled-coil-helix domain containing 4                                  | Chchd4        | 878 | 12334 | 8.5  | transport                        | cell organization and biogenesis |
| 1431119_at   | DnaJ (Hsp40) related, subfamily B, member 13                                             | Dnajb13       | 879 | 1352  | 8.5  | protein metabolism               | metabolism                       |
| 1449152_at   | cyclin-dependent kinase inhibitor 2B (p15, inhibits CDK4)                                | Cdkn2b        | 880 | 800   | 20.5 | cell proliferation-cell cycle    | RNA metabolism-transcription     |
| 1434133_s_at | WD repeat domain 42A                                                                     | Wdr42a        | 881 | 11166 | 20.5 |                                  |                                  |
| 1429133_at   | RIKEN cDNA 4930519N16 gene                                                               | 4930519N16Rik | 882 | 19581 | 20.5 | metabolism                       |                                  |
| 1428074_at   | transmembrane protein 158                                                                | Tmem158       | 883 | 1930  | 16.5 |                                  |                                  |
| 1451342_at   | spondin 1, (f-spondin) extracellular matrix protein                                      | Spon1         | 884 | 1637  | 8.5  | cell adhesion                    | development                      |
| 1440587_at   | ---                                                                                      | ---           | 885 | 30263 | 16.5 |                                  |                                  |
| 1448202_x_at | RIKEN cDNA 2610524G07 gene                                                               | 2610524G07Rik | 886 | 17363 | 0.5  |                                  |                                  |
| 1416481_s_at | HIG1 domain family, member 1A                                                            | Higd1a        | 887 | 21461 | 20.5 |                                  |                                  |
| 1450197_at   | retinal pigment epithelium 65                                                            | Rpe65         | 888 | 757   | 16.5 | development                      | cell organization and biogenesis |
| 1423505_at   | transgelin                                                                               | Tagln         | 889 | 7881  | 20.5 | development                      | cell organization and biogenesis |
| 1420953_at   | adducin 1 (alpha)                                                                        | Add1          | 890 | 3876  | 20.5 |                                  |                                  |
| 1426680_at   | selenoprotein N, 1                                                                       | Sepn1         | 891 | 14140 | 0.5  |                                  |                                  |
| 1427892_at   | myosin IG                                                                                | Myo1g         | 892 | 32394 | 12.5 |                                  |                                  |
| 1430951_at   | RIKEN cDNA 2810011L19 gene                                                               | 2810011L19Rik | 893 | 32395 | 4.5  |                                  |                                  |
| 1452219_at   | transmembrane protein 63b                                                                | Tmem63b       | 894 | 8854  | 20.5 |                                  |                                  |
| 1435896_at   | sideroflexin 2                                                                           | Sfxn2         | 895 | 197   | 4.5  | transport                        |                                  |
| 1415852_at   | inosine 5'-phosphate dehydrogenase 2                                                     | Impdh2        | 896 | 23761 | 0.5  | cell proliferation-cell cycle    | metabolism                       |
| 1437148_at   | actin related protein 2/3 complex, subunit 2                                             | Arpc2         | 897 | 3658  | 4.5  | cell organization and biogenesis | protein metabolism               |
| 1427939_s_at | c-myc binding protein                                                                    | Mycbp         | 898 | 16778 | 4.5  | RNA metabolism-transcription     | metabolism                       |
| 1416452_at   | ornithine aminotransferase                                                               | Oat           | 899 | 31440 | 20.5 | metabolism                       |                                  |
| 1428621_a_at | vacuolar protein sorting 25 (yeast)                                                      | Vps25         | 900 | 3333  | 4.5  | RNA metabolism-transcription     | transport                        |
| 1452572_at   | calcium/calmodulin-dependent protein kinase IV                                           | Camk4         | 901 | 17540 | 8.5  | cell-cell signaling              | transport                        |
| 1456193_x_at | glutathione peroxidase 4                                                                 | Gpx4          | 902 | 14219 | 16.5 | DNA metabolism                   | stress response                  |
| 1452648_at   | transforming growth factor beta regulated gene 1                                         | Tbrg1         | 903 | 5651  | 4.5  |                                  |                                  |
| 1424534_at   | monocyte to macrophage differentiation-associated 2                                      | Mmd2          | 904 | 13661 | 20.5 | death                            |                                  |
| 1439347_at   | tensin 4                                                                                 | Tns4          | 905 | 2293  | 16.5 | death                            | signal transduction              |
| 1418953_at   | F-box protein 16                                                                         | Fbxo16#       | 906 | 32343 | 16.5 | protein metabolism               | metabolism                       |
| 1460326_at   | phosphatidylinositol 3-kinase, catalytic, alpha polypeptide                              | Pik3ca        | 907 | 27971 | 20.5 | death                            | signal transduction              |
| 1435772_at   | kinesin family member 21B                                                                | Kif21b        | 908 | 20596 | 0.5  | transport                        | cell organization and biogenesis |
| 1425992_at   | solute carrier family 6 (neurotransmitter transporter, glycine), member 5                | Slc6a5        | 909 | 18107 | 8.5  | cell-cell signaling              | transport                        |
| 1435370_a_at | carboxylesterase 3                                                                       | Ces3          | 910 | 3675  | 16.5 | metabolism                       |                                  |
| 1429067_at   | calpain, small subunit 2                                                                 | Capns2        | 911 | 1556  | 8.5  |                                  |                                  |
| 1451647_at   | solute carrier family 24 (sodium/potassium/calcium exchanger), member 1                  | Sic24a1       | 912 | 752   | 16.5 | transport                        |                                  |
| 1426602_at   | v-raf murine sarcoma 3611 viral oncogene homolog                                         | Araf          | 913 | 10216 | 20.5 | cell proliferation-cell cycle    | signal transduction              |
| 1459389_at   | Centaurin, gamma 2                                                                       | Centg2        | 914 | 27091 | 8.5  | transport                        | signal transduction              |
| 1456538_at   | serologically defined colon cancer antigen 8                                             | Sdccag8       | 915 | 2711  | 16.5 |                                  |                                  |
| 1453537_a_at | WD repeat domain 17                                                                      | Wdr17         | 916 | 634   | 12.5 |                                  |                                  |
| 1446754_a_at | Vax2 opposite strand transcript 1                                                        | Vax2os1       | 917 | 1095  | 20.5 |                                  |                                  |
| 1423317_at   | RIKEN cDNA 3110001D03 gene                                                               | 3110001D03Rik | 918 | 1562  | 4.5  |                                  |                                  |
| 1440447_at   | abhydrolase domain containing 2                                                          | Abhd2         | 919 | 19668 | 12.5 | stress response                  |                                  |
| 1435536_at   | regulatory solute carrier protein, family 1, member 1                                    | Rsc1a1        | 920 | 21459 | 16.5 | transport                        |                                  |
| 1426955_at   | procollagen, type XVIII, alpha 1                                                         | Col18a1       | 921 | 3662  | 0.5  | cell adhesion                    | cell proliferation-cell cycle    |
| 1459672_at   | Topoisomerase (DNA) I                                                                    | Top1          | 922 | 4897  | 8.5  | DNA metabolism                   | development                      |
| 1452825_at   | RIKEN cDNA 5330410G16 gene                                                               | 5330410G16Rik | 923 | 22323 | 20.5 |                                  |                                  |
| 1424243_at   | RWD domain containing 4A                                                                 | Rwdd4a        | 924 | 329   | 20.5 | protein metabolism               | metabolism                       |
| 1434690_at   | lysocardiolipin acyltransferase                                                          | Lycat         | 925 | 1796  | 20.5 | metabolism                       |                                  |
| 1434876_at   | glycosyltransferase 8 domain containing 3                                                | Glt8d3        | 926 | 22255 | 4.5  | metabolism                       |                                  |
| 1437679_a_at | glutaredoxin 2 (thioltransferase)                                                        | Glxr2         | 927 | 3804  | 20.5 | death                            | DNA metabolism                   |
| 1415702_a_at | C-terminal binding protein 1                                                             | Ctbp1         | 928 | 12642 | 20.5 | cell proliferation-cell cycle    | protein metabolism               |
| 1452879_at   | synaptodin 2                                                                             | Synpo2        | 929 | 2244  | 20.5 |                                  |                                  |
| 1418123_at   | unc-119 homolog (C. elegans)                                                             | Unc119        | 930 | 291   | 4.5  | cell-cell signaling              | transport                        |
| 1429185_at   | RIKEN cDNA 4631416L12 gene                                                               | 4631416L12Rik | 931 | 524   | 12.5 | signal transduction              |                                  |
| 1420124_s_at | T-cell leukemia translocation altered gene                                               | Tcta          | 932 | 14997 | 8.5  |                                  |                                  |
| 1433806_x_at | calreticulin                                                                             | Calr          | 933 | 1161  | 20.5 | cell proliferation-cell cycle    | death                            |
| 1421917_at   | platelet derived growth factor receptor, alpha polypeptide                               | Pdgfra        | 934 | 6566  | 20.5 | cell proliferation-cell cycle    | development                      |
| 1428444_at   | ankyrin repeat and SOCS box-containing protein 2                                         | Asb2          | 935 | 2201  | 16.5 | RNA metabolism-transcription     | signal transduction              |
| 1437277_x_at | transglutaminase 2, C polypeptide                                                        | Tgm2          | 936 | 95    | 0.5  | cell adhesion                    | signal transduction              |
| 1437621_x_at | 3-phosphoglycerate dehydrogenase                                                         | Pghdh         | 937 | 782   | 4.5  | metabolism                       |                                  |
| 1435318_at   | RIKEN cDNA E130218I03 gene                                                               | E130218I03Rik | 938 | 7038  | 0.5  |                                  |                                  |
| 1424119_at   | protein kinase, AMP-activated, beta 1 non-catalytic subunit                              | Prkab1        | 939 | 5936  | 0.5  | stress response                  | signal transduction              |
| 1453512_at   | RIKEN cDNA 5830407P18 gene                                                               | 5830407P18Rik | 940 | 11611 | 4.5  |                                  |                                  |
| 1455550_x_at | serine incorporator 3                                                                    | Serinc3       | 941 | 15397 | 16.5 | death                            |                                  |
| 1434546_at   | Smg-5 homolog, nonsense mediated mRNA decay factor (C. elegans)                          | Smg5          | 942 | 6523  | 0.5  | RNA metabolism-transcription     | transport                        |
| 1420834_at   | vesicle-associated membrane protein 2                                                    | Vamp2         | 943 | 24920 | 20.5 | cell-cell signaling              | transport                        |
| 1452069_a_at | THAP domain containing 7                                                                 | Thap7         | 944 | 21064 | 20.5 | RNA metabolism-transcription     | metabolism                       |
| 1418945_at   | matrix metalloproteinase 3                                                               | Mmp3          | 945 | 326   | 4.5  | protein metabolism               | metabolism                       |
| 1449126_at   | zinc finger protein 90                                                                   | Zfp90         | 946 | 4022  | 0.5  | RNA metabolism-transcription     | metabolism                       |
| 1434853_x_at | makorin, ring finger protein, 1                                                          | Mkrm1         | 947 | 29924 | 20.5 |                                  |                                  |
| 1436292_a_at | ornithine decarboxylase antizyme                                                         | Oaz1          | 948 | 7075  | 0.5  | metabolism                       |                                  |
| 1424104_at   | Syf2 homolog, RNA splicing factor (S. cerevisiae)                                        | Syf2          | 949 | 5338  | 0.5  | RNA metabolism-transcription     | metabolism                       |
| 1428484_at   | oxysterol binding protein-like 3                                                         | Oxsbpl3       | 950 | 20609 | 4.5  | transport                        | metabolism                       |
| 1452457_a_at | protein kinase, AMP-activated, beta 1 non-catalytic subunit                              | Prkab1        | 951 | 10038 | 20.5 | stress response                  | signal transduction              |
| 1433507_a_at | high mobility group nucleosomal binding domain 2                                         | Hmgnd2        | 952 | 5022  | 8.5  | DNA metabolism                   | metabolism                       |
| 1423689_a_at | G-protein signalling modulator 1 (AGS3-like, C. elegans)                                 | Gpsm1         | 953 | 7121  | 20.5 | development                      | signal transduction              |
| 1434755_at   | coronin, actin binding protein, 2B                                                       | Coro2b        | 954 | 8938  | 0.5  | cell organization and biogenesis |                                  |
| 1434082_at   | ---                                                                                      | ---           | 955 | 19741 | 16.5 |                                  |                                  |
| 1441712_at   | Trf (TATA binding protein-related factor)-proximal protein homolog (Drosophila)          | Trfp          | 956 | 32396 | 8.5  | RNA metabolism-transcription     | protein metabolism               |
| 1432705_at   | RIKEN cDNA 5330428N10 gene                                                               | 5330428N10Rik | 957 | 4646  | 4.5  |                                  |                                  |
| 1422979_at   | suppressor of variegation 3-9 homolog 2 (Drosophila)                                     | Suv39h2       | 958 | 741   | 0.5  | cell proliferation-cell cycle    | DNA metabolism                   |
| 1419665_a_at | nuclear protein 1                                                                        | Nupr1         | 959 | 22258 | 4.5  | death                            | development                      |
| 1418151_at   | myotubularin related protein 4                                                           | Mtmr4         | 960 | 11918 | 16.5 | protein metabolism               | metabolism                       |
| 1445895_at   | T-cell receptor beta, variable 8.2                                                       | Tcrb-V8.2     | 961 | 20606 | 16.5 |                                  |                                  |
| 1448376_at   | Werner helicase interacting protein 1                                                    | Wrip1         | 962 | 26495 | 0.5  | DNA metabolism                   | stress response                  |
| 1451501_a_at | growth hormone receptor                                                                  | Ghr           | 963 | 10851 | 16.5 | transport                        | development                      |
| 1448850_a_at | DnaJ (Hsp40) homolog, subfamily C, member 5                                              | Dnajc5        | 964 | 19434 | 16.5 | protein metabolism               | metabolism                       |
| 1424308_at   | solute carrier family 24 (sodium/potassium/calcium exchanger), member 3                  | Sic24a3       | 965 | 24429 | 0.5  | transport                        |                                  |
| 1434909_at   | Ras-related GTP binding D                                                                | Rragd         | 966 | 17171 | 20.5 |                                  |                                  |
| 1454886_x_at | ---                                                                                      | ---           | 967 | 13550 | 0.5  |                                  |                                  |
| 1424952_at   | OCIA domain containing 1                                                                 | Ociad1        | 968 | 18751 | 20.5 |                                  |                                  |
| 1416984_at   | mitochondrial ribosomal protein S18A                                                     | Mrps18a       | 969 | 2791  | 20.5 | protein metabolism               | metabolism                       |
| 1425219_x_at | guanine nucleotide binding protein (G protein), gamma transducing activity polypeptide 1 | Gngt1         | 970 | 30073 | 4.5  | signal transduction              |                                  |
| 1426235_a_at | glutamate-ammonia ligase (glutamine synthetase)                                          | Glul          | 971 | 16874 | 16.5 | metabolism                       |                                  |

|              |                                                                                                               |               |      |       |      |                                  |                                  |
|--------------|---------------------------------------------------------------------------------------------------------------|---------------|------|-------|------|----------------------------------|----------------------------------|
| 1438299_at   | RIKEN cDNA 3100002L24 gene                                                                                    | 3100002L24Rik | 972  | 31621 | 0.5  | RNA metabolism-transcription     | metabolism                       |
| 1456610_at   | jumonji domain containing 3                                                                                   | Jmjd3         | 973  | 3676  | 16.5 |                                  |                                  |
| 1417716_at   | glutamate oxaloacetate transaminase 2, mitochondrial                                                          | Got2          | 974  | 23032 | 0.5  | metabolism                       |                                  |
| 1426913_at   | lanosterol synthase                                                                                           | Lss           | 975  | 715   | 4.5  | metabolism                       |                                  |
| 1416130_at   | prion protein                                                                                                 | Prnp          | 976  | 8369  | 16.5 | stress response                  | metabolism                       |
| 1434574_at   | RIKEN cDNA 9430008C03 gene                                                                                    | 9430008C03Rik | 977  | 9601  | 20.5 |                                  |                                  |
| 1434606_at   | v-erb-b2 erythroblastic leukemia viral oncogene homolog 3 (avian)                                             | ErbB3         | 978  | 24281 | 20.5 | cell proliferation-cell cycle    | development                      |
| 1419062_at   | erythrocyte protein band 4.1-like 3                                                                           | Epb4.1/3      | 979  | 15853 | 16.5 | cell organization and biogenesis |                                  |
| 1428254_at   | Purine rich element binding protein B                                                                         | Purb          | 980  | 20181 | 20.5 | cell proliferation-cell cycle    | death                            |
| 1438358_x_at | prefoldin 5                                                                                                   | Pfdn5         | 981  | 10719 | 0.5  | RNA metabolism-transcription     | protein metabolism               |
| 1415860_at   | karyopherin (importin) alpha 2                                                                                | Kpna2         | 982  | 2130  | 0.5  | transport                        | cell organization and biogenesis |
| 1451165_at   | limb region 1 like                                                                                            | Lmbr1         | 983  | 3642  | 0.5  | transport                        |                                  |
| 1415978_at   | tubulin, beta 3                                                                                               | Tubb3#        | 984  | 32384 | 16.5 | transport                        | development                      |
| 1424143_a_at | chromatin licensing and DNA replication factor 1                                                              | Cdt1          | 985  | 2605  | 8.5  | cell proliferation-cell cycle    | DNA metabolism                   |
| 1436731_at   | zinc finger protein 533                                                                                       | Zfp533        | 986  | 8200  | 20.5 |                                  |                                  |
| 1436662_at   | VPS10 domain receptor protein SORCS 1                                                                         | Sorcs1        | 987  | 5203  | 8.5  |                                  |                                  |
| 1434264_at   | ankyrin 2, brain                                                                                              | Ank2          | 988  | 10398 | 20.5 | death                            | signal transduction              |
| 1448145_at   | WW domain containing E3 ubiquitin protein ligase 2                                                            | Wwp2          | 989  | 24222 | 20.5 | protein metabolism               | metabolism                       |
| 1417470_at   | apolipoprotein B editing complex 3                                                                            | Apobec3       | 990  | 13048 | 4.5  |                                  |                                  |
| 1443618_at   | PDZ domain containing 2                                                                                       | Pdzd2         | 991  | 19594 | 4.5  | protein metabolism               | metabolism                       |
| 1444232_at   | protein kinase, cGMP-dependent, type I                                                                        | Prkg1         | 992  | 22844 | 0.5  | development                      | signal transduction              |
| 1434673_at   | G protein-coupled receptor 22                                                                                 | Gpr22         | 993  | 8281  | 8.5  | signal transduction              |                                  |
| 1453317_a_at | KH domain containing, RNA binding, signal transduction associated 3                                           | Khdrbs3       | 994  | 217   | 20.5 | RNA metabolism-transcription     | metabolism                       |
| 1449528_at   | c-fos induced growth factor                                                                                   | Figf          | 995  | 32397 | 16.5 | cell proliferation-cell cycle    | development                      |
| 1425752_at   | cDNA sequence BC014805                                                                                        | BC014805      | 996  | 18112 | 4.5  | transport                        |                                  |
| 1417419_at   | cyclin D1                                                                                                     | Ccnd1         | 997  | 317   | 12.5 | cell proliferation-cell cycle    | stress response                  |
| 1435800_a_at | cold shock domain protein A                                                                                   | Csda          | 998  | 860   | 20.5 | RNA metabolism-transcription     | stress response                  |
| 1457027_at   | dehydrogenase E1 and transketolase domain containing 1                                                        | Dhtkd1        | 999  | 30038 | 4.5  | metabolism                       |                                  |
| 1422725_at   | male germ cell-associated kinase                                                                              | Mak           | 1000 | 7985  | 16.5 | protein metabolism               | metabolism                       |
| 1416892_s_at | RIKEN cDNA 3110001A13 gene                                                                                    | 3110001A13Rik | 1001 | 23856 | 20.5 |                                  |                                  |
| 1441018_at   | ubiquitin specific peptidase 24                                                                               | Usp24         | 1002 | 31620 | 12.5 | transport                        | protein metabolism               |
| 1425163_at   | expressed sequence AI661453                                                                                   | AI661453      | 1003 | 2632  | 4.5  |                                  |                                  |
| 1443416_at   | expressed sequence C79741                                                                                     | C79741        | 1004 | 18814 | 8.5  |                                  |                                  |
| 1428843_at   | membrane-associated ring finger (C3HC4) 5                                                                     | March5        | 1005 | 7528  | 20.5 |                                  |                                  |
| 1416773_at   | wee 1 homolog (S. pombe)                                                                                      | Wee1          | 1006 | 10944 | 12.5 | cell proliferation-cell cycle    | protein metabolism               |
| 1423721_at   | tropomyosin 1, alpha                                                                                          | Tpm1          | 1007 | 23581 | 4.5  |                                  |                                  |
| 1437031_at   | Acyl-CoA synthetase long-chain family member 6                                                                | Acsf6         | 1008 | 27694 | 20.5 | cell proliferation-cell cycle    | development                      |
| 1436223_at   | integrin beta 8                                                                                               | ItgB8         | 1009 | 3342  | 20.5 | cell adhesion                    | development                      |
| 1433582_at   | RIKEN cDNA 1190002N15 gene                                                                                    | 1190002N15Rik | 1010 | 26664 | 12.5 |                                  |                                  |
| 1417377_at   | immunoglobulin superfamily, member 4A                                                                         | IgSF4a        | 1011 | 1601  | 8.5  | cell adhesion                    | death                            |
| 1457375_at   | ---                                                                                                           | ---           | 1012 | 18179 | 12.5 |                                  |                                  |
| 1459336_at   | Guanylate cyclase 1, soluble, alpha 2                                                                         | Gucy1a2       | 1013 | 6224  | 4.5  | signal transduction              | metabolism                       |
| 1456722_at   | chordin-like 1                                                                                                | Chrd1         | 1014 | 7135  | 0.5  | development                      |                                  |
| 1448359_a_at | HIG1 domain family, member 1A                                                                                 | Higd1a        | 1015 | 12826 | 16.5 |                                  |                                  |
| 1417865_at   | tumor necrosis factor, alpha-induced protein 1 (endothelial)                                                  | Tnfaip1       | 1016 | 28723 | 16.5 | DNA metabolism                   | RNA metabolism-transcription     |
| 1429153_at   | RIKEN cDNA 6530406A20 gene                                                                                    | 6530406A20Rik | 1017 | 22876 | 20.5 |                                  |                                  |
| 1423978_at   | SH3-binding kinase 1                                                                                          | Sbk1          | 1018 | 17775 | 20.5 | protein metabolism               | metabolism                       |
| 1452466_a_at | RNA binding motif protein 6                                                                                   | Rbm6          | 1019 | 15446 | 0.5  | metabolism                       |                                  |
| 1456137_at   | neurexin III                                                                                                  | Nrxn3         | 1020 | 1315  | 8.5  | cell adhesion                    | cell-cell signaling              |
| 1434510_at   | 3'-phosphoadenosine 5'-phosphosulfate synthase 2                                                              | Papss2        | 1021 | 5763  | 20.5 | development                      | metabolism                       |
| 1438133_a_at | cysteine rich protein 61                                                                                      | Cyr61         | 1022 | 1487  | 12.5 | cell adhesion                    | cell proliferation-cell cycle    |
| 1426342_at   | STT3, subunit of the oligosaccharyltransferase complex, homolog B (S. cerevisiae)                             | Stt3b         | 1023 | 8826  | 20.5 | protein metabolism               | metabolism                       |
| 1455203_at   | RIKEN cDNA A930003A15 gene                                                                                    | A930003A15Rik | 1024 | 30170 | 20.5 |                                  |                                  |
| 1444178_at   | hypothetical gene supported by AK028012                                                                       | LOC433237     | 1025 | 11988 | 16.5 |                                  |                                  |
| 1448305_at   | RAB6, member RAS oncogene family                                                                              | Rab6          | 1026 | 32103 | 20.5 | transport                        | signal transduction              |
| 1450031_at   | AF4/FMR2 family, member 4                                                                                     | Aff4          | 1027 | 1946  | 20.5 | RNA metabolism-transcription     | development                      |
| 1436841_at   | RIKEN cDNA B230380D07 gene                                                                                    | B230380D07Rik | 1028 | 2313  | 20.5 | transport                        |                                  |
| 1450658_at   | a disintegrin-like and metalloproteinase (reprolysin type) with thrombospondin type 1 motif, 5 (aagrc Adams5) | Adams5        | 1029 | 10492 | 8.5  | signal transduction              | protein metabolism               |
| 1417955_at   | coiled-coil domain containing 71                                                                              | Ccdc71        | 1030 | 25379 | 4.5  |                                  |                                  |
| 1422561_at   | a disintegrin-like and metalloproteinase (reprolysin type) with thrombospondin type 1 motif, 5 (aggrc Adams5) | Adams5        | 1031 | 17831 | 20.5 | signal transduction              | protein metabolism               |
| 1425019_at   | UBX domain containing 4                                                                                       | Ubx4          | 1032 | 32246 | 20.5 |                                  |                                  |
